# Supplementary material for: Epitope vaccine design for Toxoplasma gondii based on a genome-wide database of membrane proteins
Source: Parasit Vectors. 2022 Oct 12;15:364. doi: 10.1186/s13071-022-05497-z (PMC9555269; doi:10.1186/s13071-022-05497-z)
Supplement: Supplementary file 1 — Additional file 1. Information on membrane proteins of Toxoplasma gondii obtained from the UniProt database. [file 13071_2022_5497_MOESM1_ESM.xlsx]

## Sheet: Sheet 1
Entry	Entry name	Status	Protein names	Gene names	Organism	Length	Subcellular location [CC]
A0A086JKC7	A0A086JKC7_TOXGO	unreviewed	SAG-related sequence protein SRS15A	TGDOM2_364450	Toxoplasma gondii GAB2-2007-GAL-DOM2	392	membrane
A0A086KU07	A0A086KU07_TOXGO	unreviewed	Putative mature parasite infected erythrocyte surface antigen (Fragment)	TGDOM2_397810	Toxoplasma gondii GAB2-2007-GAL-DOM2	118	Putative mature parasite infected erythrocyte surface antigen
A0A086PU85	A0A086PU85_TOXGO	unreviewed	SAG-related sequence protein SRS16E	TGVAND_437450	Toxoplasma gondii VAND	403	membrane
A0A086QA53	A0A086QA53_TOXGO	unreviewed	Variable surface lipoprotein (Fragment)	TGMAS_415390	Toxoplasma gondii MAS	204	Variable surface lipoprotein
A0A086QAY6	A0A086QAY6_TOXGO	unreviewed	Putative transmembrane protein	TGMAS_415320	Toxoplasma gondii MAS	167	SUBCELLULAR LOCATION: Cell membrane {ECO:0000256|ARBA:ARBA00004651}; Multi-pass membrane protein {ECO:0000256|ARBA:ARBA00004651}. Membrane {ECO:0000256|ARBA:ARBA00004141}; Multi-pass membrane protein {ECO:0000256|ARBA:ARBA00004141}.
A0A0B5L9J2	A0A0B5L9J2_TOXGO	unreviewed	Rhoptry protein 8	ROP8	Toxoplasma gondii	575	membrane
A0A0F7UUP0	A0A0F7UUP0_TOXGV	unreviewed	SRS12D	BN1205_059060	Toxoplasma gondii (strain ATCC 50861 / VEG)	373	membrane
A0A0F7UVZ8	A0A0F7UVZ8_TOXGV	unreviewed	Uncharacterized protein	BN1205_009390	Toxoplasma gondii (strain ATCC 50861 / VEG)	2871	SUBCELLULAR LOCATION: Cell membrane {ECO:0000256|ARBA:ARBA00004651}; Multi-pass membrane protein {ECO:0000256|ARBA:ARBA00004651}. Membrane {ECO:0000256|ARBA:ARBA00004141}; Multi-pass membrane protein {ECO:0000256|ARBA:ARBA00004141}.
A0A0F7UWI1	A0A0F7UWI1_TOXGV	unreviewed	Uncharacterized protein	BN1205_011263	Toxoplasma gondii (strain ATCC 50861 / VEG)	369	membrane
A0A0F7UXU4	A0A0F7UXU4_TOXGV	unreviewed	EH protein, putative	BN1205_024350	Toxoplasma gondii (strain ATCC 50861 / VEG)	594	SUBCELLULAR LOCATION: Cell membrane {ECO:0000256|ARBA:ARBA00004413}; Peripheral membrane protein {ECO:0000256|ARBA:ARBA00004413}; Cytoplasmic side {ECO:0000256|ARBA:ARBA00004413}.
A0A0F7V193	A0A0F7V193_TOXGV	unreviewed	Variable surface lipoprotein	BN1205_107830	Toxoplasma gondii (strain ATCC 50861 / VEG)	870	Variable surface lipoprotein
A0A0F7V1N0	A0A0F7V1N0_TOXGV	unreviewed	Surface antigen, putative	BN1205_088700	Toxoplasma gondii (strain ATCC 50861 / VEG)	340	membrane
A0A0F7V3W0	A0A0F7V3W0_TOXGV	unreviewed	Rhoptry kinase family protein ROP2B (Incomplete catalytic triad)	BN1205_030040	Toxoplasma gondii (strain ATCC 50861 / VEG)	561	membrane
A0A0F7VBP5	A0A0F7VBP5_TOXGV	unreviewed	Rhoptry kinase family protein ROP5 (Incomplete catalytic triad)	BN1205_069980	Toxoplasma gondii (strain ATCC 50861 / VEG)	549	membrane
A0A125YFW4	A0A125YFW4_TOXGM	unreviewed	Membrane protein, putative	TGME49_218740	Toxoplasma gondii (strain ATCC 50611 / Me49)	184	integral component of membrane
A0A125YFX8	A0A125YFX8_TOXGM	unreviewed	Adaptor complexes medium subunit family protein	TGME49_230920	Toxoplasma gondii (strain ATCC 50611 / Me49)	619	SUBCELLULAR LOCATION: Cell membrane {ECO:0000256|ARBA:ARBA00004236}. Membrane, coated pit {ECO:0000256|ARBA:ARBA00004277}; Peripheral membrane protein {ECO:0000256|ARBA:ARBA00004277}; Cytoplasmic side {ECO:0000256|ARBA:ARBA00004277}.
A0A125YG69	A0A125YG69_TOXGM	unreviewed	RHOMBOID-like protein	ROM5 TGME49_294690	Toxoplasma gondii (strain ATCC 50611 / Me49)	841	SUBCELLULAR LOCATION: Membrane {ECO:0000256|ARBA:ARBA00004141, ECO:0000256|RuleBase:RU362115}; Multi-pass membrane protein {ECO:0000256|ARBA:ARBA00004141, ECO:0000256|RuleBase:RU362115}.
A0A125YG98	A0A125YG98_TOXGM	unreviewed	Transmembrane protein 163	TGME49_313680	Toxoplasma gondii (strain ATCC 50611 / Me49)	497	SUBCELLULAR LOCATION: Cytoplasmic vesicle, secretory vesicle, synaptic vesicle membrane {ECO:0000256|ARBA:ARBA00004644}; Multi-pass membrane protein {ECO:0000256|ARBA:ARBA00004644}. Early endosome membrane {ECO:0000256|ARBA:ARBA00004146}. Endosome membrane {ECO:0000256|ARBA:ARBA00004608}. Membrane {ECO:0000256|ARBA:ARBA00004141}; Multi-pass membrane protein {ECO:0000256|ARBA:ARBA00004141}.
A0A125YGA5	A0A125YGA5_TOXGM	unreviewed	Metal cation transporter, ZIP family protein	TGME49_261720	Toxoplasma gondii (strain ATCC 50611 / Me49)	448	SUBCELLULAR LOCATION: Membrane {ECO:0000256|ARBA:ARBA00004141}; Multi-pass membrane protein {ECO:0000256|ARBA:ARBA00004141}.
A0A125YGL8	A0A125YGL8_TOXGM	unreviewed	Uncharacterized protein	TGME49_212200	Toxoplasma gondii (strain ATCC 50611 / Me49)	413	SUBCELLULAR LOCATION: Membrane {ECO:0000256|ARBA:ARBA00004141}; Multi-pass membrane protein {ECO:0000256|ARBA:ARBA00004141}.
A0A125YGT9	A0A125YGT9_TOXGM	unreviewed	Vesicle-fusing ATPase (EC 3.6.4.6)	TGME49_315680	Toxoplasma gondii (strain ATCC 50611 / Me49)	493	SUBCELLULAR LOCATION: Membrane {ECO:0000256|ARBA:ARBA00004170}; Peripheral membrane protein {ECO:0000256|ARBA:ARBA00004170}.
A0A125YHN5	A0A125YHN5_TOXGM	unreviewed	Hemolysin-III related subfamily protein	TGME49_241160	Toxoplasma gondii (strain ATCC 50611 / Me49)	300	SUBCELLULAR LOCATION: Membrane {ECO:0000256|ARBA:ARBA00004141}; Multi-pass membrane protein {ECO:0000256|ARBA:ARBA00004141}.
A0A125YHR6	A0A125YHR6_TOXGM	unreviewed	Membrane protein	TGME49_205760	Toxoplasma gondii (strain ATCC 50611 / Me49)	347	Membrane protein
A0A125YHS8	A0A125YHS8_TOXGM	unreviewed	Ion channel protein	TGME49_273380	Toxoplasma gondii (strain ATCC 50611 / Me49)	2972	SUBCELLULAR LOCATION: Cell membrane {ECO:0000256|ARBA:ARBA00004651}; Multi-pass membrane protein {ECO:0000256|ARBA:ARBA00004651}. Membrane {ECO:0000256|ARBA:ARBA00004141}; Multi-pass membrane protein {ECO:0000256|ARBA:ARBA00004141}.
A0A125YI62	A0A125YI62_TOXGM	unreviewed	SAG-related sequence SRS31B	SRS31B TGME49_272560	Toxoplasma gondii (strain ATCC 50611 / Me49)	125	membrane
A0A125YIB5	A0A125YIB5_TOXGM	unreviewed	Membrane protein, putative	TGME49_259590	Toxoplasma gondii (strain ATCC 50611 / Me49)	162	integral component of membrane
A0A125YIJ3	A0A125YIJ3_TOXGM	unreviewed	SAG-related sequence SRS34A	SRS34A TGME49_271050	Toxoplasma gondii (strain ATCC 50611 / Me49)	187	membrane
A0A125YIN1	A0A125YIN1_TOXGM	unreviewed	Uncharacterized protein	TGME49_216070	Toxoplasma gondii (strain ATCC 50611 / Me49)	2314	SUBCELLULAR LOCATION: Membrane {ECO:0000256|ARBA:ARBA00004141}; Multi-pass membrane protein {ECO:0000256|ARBA:ARBA00004141}.
A0A125YIR2	A0A125YIR2_TOXGM	unreviewed	Transmembrane protein 65, putative	TGME49_293800	Toxoplasma gondii (strain ATCC 50611 / Me49)	191	SUBCELLULAR LOCATION: Membrane {ECO:0000256|ARBA:ARBA00004141}; Multi-pass membrane protein {ECO:0000256|ARBA:ARBA00004141}.
A0A125YJ70	A0A125YJ70_TOXGM	unreviewed	PAP2 superfamily protein (EC 3.1.3.4)	TGME49_247360	Toxoplasma gondii (strain ATCC 50611 / Me49)	320	SUBCELLULAR LOCATION: Membrane {ECO:0000256|ARBA:ARBA00004141}; Multi-pass membrane protein {ECO:0000256|ARBA:ARBA00004141}.
A0A125YJE3	A0A125YJE3_TOXGM	unreviewed	ATP-binding cassette G family transporter ABCG87 (EC 3.6.3.30)	ABCG87 TGME49_244270	Toxoplasma gondii (strain ATCC 50611 / Me49)	794	SUBCELLULAR LOCATION: Membrane {ECO:0000256|ARBA:ARBA00004141}; Multi-pass membrane protein {ECO:0000256|ARBA:ARBA00004141}.
A0A125YJV3	A0A125YJV3_TOXGM	unreviewed	ATP synthase F0 subunit 9, putative	TGME49_249720	Toxoplasma gondii (strain ATCC 50611 / Me49)	166	SUBCELLULAR LOCATION: Membrane {ECO:0000256|ARBA:ARBA00004141}; Multi-pass membrane protein {ECO:0000256|ARBA:ARBA00004141}.
A0A125YK02	A0A125YK02_TOXGM	unreviewed	Folate/biopterin transporter, putative	TGME49_231420	Toxoplasma gondii (strain ATCC 50611 / Me49)	469	SUBCELLULAR LOCATION: Membrane {ECO:0000256|ARBA:ARBA00004141}; Multi-pass membrane protein {ECO:0000256|ARBA:ARBA00004141}.
A0A125YKS3	A0A125YKS3_TOXGM	unreviewed	Uncharacterized protein	TGME49_210820	Toxoplasma gondii (strain ATCC 50611 / Me49)	1062	SUBCELLULAR LOCATION: Membrane {ECO:0000256|ARBA:ARBA00004141}; Multi-pass membrane protein {ECO:0000256|ARBA:ARBA00004141}.
A0A125YKW6	A0A125YKW6_TOXGM	unreviewed	Uncharacterized protein	TGME49_278460	Toxoplasma gondii (strain ATCC 50611 / Me49)	161	SUBCELLULAR LOCATION: Membrane {ECO:0000256|ARBA:ARBA00004141}; Multi-pass membrane protein {ECO:0000256|ARBA:ARBA00004141}.
A0A125YL26	A0A125YL26_TOXGM	unreviewed	Cytochrome C oxidase assembly factor COX15, putative	TGME49_228180	Toxoplasma gondii (strain ATCC 50611 / Me49)	327	SUBCELLULAR LOCATION: Membrane {ECO:0000256|ARBA:ARBA00004141}; Multi-pass membrane protein {ECO:0000256|ARBA:ARBA00004141}.
A0A125YL33	A0A125YL33_TOXGM	unreviewed	Uncharacterized protein	TGME49_231110	Toxoplasma gondii (strain ATCC 50611 / Me49)	194	SUBCELLULAR LOCATION: Membrane {ECO:0000256|ARBA:ARBA00004141}; Multi-pass membrane protein {ECO:0000256|ARBA:ARBA00004141}.
A0A125YL81	A0A125YL81_TOXGM	unreviewed	Integral membrane protein, putative	TGME49_266800	Toxoplasma gondii (strain ATCC 50611 / Me49)	302	SUBCELLULAR LOCATION: Membrane {ECO:0000256|ARBA:ARBA00004141}; Multi-pass membrane protein {ECO:0000256|ARBA:ARBA00004141}.
A0A125YLC3	A0A125YLC3_TOXGM	unreviewed	Bax inhibitor-1, putative	TGME49_255900	Toxoplasma gondii (strain ATCC 50611 / Me49)	248	SUBCELLULAR LOCATION: Membrane {ECO:0000256|ARBA:ARBA00004141}; Multi-pass membrane protein {ECO:0000256|ARBA:ARBA00004141}.
A0A125YLH1	A0A125YLH1_TOXGM	unreviewed	t-SNARE coiled-coil homology domain-containing protein	TGME49_205030	Toxoplasma gondii (strain ATCC 50611 / Me49)	113	SUBCELLULAR LOCATION: Membrane {ECO:0000256|ARBA:ARBA00004211}; Single-pass type IV membrane protein {ECO:0000256|ARBA:ARBA00004211}.
A0A125YLL5	A0A125YLL5_TOXGM	unreviewed	SAG-related sequence SRS54	SRS54 TGME49_315740	Toxoplasma gondii (strain ATCC 50611 / Me49)	389	membrane
A0A125YLL7	A0A125YLL7_TOXGM	unreviewed	Vesicle-associated membrane protein, putative	TGME49_230430	Toxoplasma gondii (strain ATCC 50611 / Me49)	221	integral component of membrane
A0A125YLN5	A0A125YLN5_TOXGM	unreviewed	Membrane protein, putative	TGME49_225730	Toxoplasma gondii (strain ATCC 50611 / Me49)	128	Membrane protein, putative
A0A125YM28	A0A125YM28_TOXGM	unreviewed	Phosphatidylinositol n-acetylglucosaminyltransferase (EC 2.4.1.198)	TGME49_299040	Toxoplasma gondii (strain ATCC 50611 / Me49)	348	SUBCELLULAR LOCATION: Membrane {ECO:0000256|ARBA:ARBA00004141}; Multi-pass membrane protein {ECO:0000256|ARBA:ARBA00004141}.
A0A125YM56	A0A125YM56_TOXGM	unreviewed	Membrane protein, putative	TGME49_310000	Toxoplasma gondii (strain ATCC 50611 / Me49)	719	SUBCELLULAR LOCATION: Membrane {ECO:0000256|ARBA:ARBA00004141}; Multi-pass membrane protein {ECO:0000256|ARBA:ARBA00004141}.
A0A125YMH5	A0A125YMH5_TOXGM	unreviewed	Integral membrane protein, putative	TGME49_310870	Toxoplasma gondii (strain ATCC 50611 / Me49)	201	SUBCELLULAR LOCATION: Membrane {ECO:0000256|ARBA:ARBA00004141}; Multi-pass membrane protein {ECO:0000256|ARBA:ARBA00004141}.
A0A125YMI5	A0A125YMI5_TOXGM	unreviewed	Carrier superfamily protein	TGME49_277090	Toxoplasma gondii (strain ATCC 50611 / Me49)	885	SUBCELLULAR LOCATION: Membrane {ECO:0000256|ARBA:ARBA00004141}; Multi-pass membrane protein {ECO:0000256|ARBA:ARBA00004141}.
A0A125YML5	A0A125YML5_TOXGM	unreviewed	Membrane protein, putative	TGME49_241820	Toxoplasma gondii (strain ATCC 50611 / Me49)	291	integral component of membrane
A0A125YMR6	A0A125YMR6_TOXGM	unreviewed	Dolichyl-diphosphooligosaccharide--protein glycotransferase (EC 2.4.99.18)	TGME49_231430	Toxoplasma gondii (strain ATCC 50611 / Me49)	753	SUBCELLULAR LOCATION: Membrane {ECO:0000256|ARBA:ARBA00004141}; Multi-pass membrane protein {ECO:0000256|ARBA:ARBA00004141}.
A0A125YMZ8	A0A125YMZ8_TOXGM	unreviewed	Glycosyl transferase (EC 2.4.1.41)	TGME49_318730	Toxoplasma gondii (strain ATCC 50611 / Me49)	635	SUBCELLULAR LOCATION: Membrane {ECO:0000256|ARBA:ARBA00004606}; Single-pass type II membrane protein {ECO:0000256|ARBA:ARBA00004606}.
A0A125YNC4	A0A125YNC4_TOXGM	unreviewed	2-oxoglutarate/malate translocase OMT	OMT TGME49_274060	Toxoplasma gondii (strain ATCC 50611 / Me49)	323	SUBCELLULAR LOCATION: Membrane {ECO:0000256|ARBA:ARBA00004141}; Multi-pass membrane protein {ECO:0000256|ARBA:ARBA00004141}.
A0A125YND1	A0A125YND1_TOXGM	unreviewed	SAG-related sequence SRS12A	SRS12A TGME49_321490	Toxoplasma gondii (strain ATCC 50611 / Me49)	386	membrane
A0A125YNN9	A0A125YNN9_TOXGM	unreviewed	Membrane protein	TGME49_242840	Toxoplasma gondii (strain ATCC 50611 / Me49)	119	integral component of membrane
A0A125YP19	A0A125YP19_TOXGM	unreviewed	SAG-related sequence SRS30C	SRS30C TGME49_273120	Toxoplasma gondii (strain ATCC 50611 / Me49)	374	membrane
A0A125YP96	A0A125YP96_TOXGM	unreviewed	Uncharacterized protein	TGME49_214810	Toxoplasma gondii (strain ATCC 50611 / Me49)	322	SUBCELLULAR LOCATION: Membrane {ECO:0000256|ARBA:ARBA00004141}; Multi-pass membrane protein {ECO:0000256|ARBA:ARBA00004141}.
A0A125YPI0	A0A125YPI0_TOXGM	unreviewed	Sarcalumenin/eps15 family protein	TGME49_231210	Toxoplasma gondii (strain ATCC 50611 / Me49)	594	SUBCELLULAR LOCATION: Cell membrane {ECO:0000256|ARBA:ARBA00004413}; Peripheral membrane protein {ECO:0000256|ARBA:ARBA00004413}; Cytoplasmic side {ECO:0000256|ARBA:ARBA00004413}.
A0A125YPJ3	A0A125YPJ3_TOXGM	unreviewed	Membrane protein, putative	TGME49_281950	Toxoplasma gondii (strain ATCC 50611 / Me49)	355	Membrane protein, putative
A0A125YPQ2	A0A125YPQ2_TOXGM	unreviewed	Uncharacterized protein	TGME49_248660	Toxoplasma gondii (strain ATCC 50611 / Me49)	122	SUBCELLULAR LOCATION: Membrane {ECO:0000256|ARBA:ARBA00004167}; Single-pass membrane protein {ECO:0000256|ARBA:ARBA00004167}.
A0A125YQ14	A0A125YQ14_TOXGM	unreviewed	Microsomal prostaglandin E synthase 2 (EC 5.3.99.3) (Prostaglandin E synthase 2)	TGME49_304660	Toxoplasma gondii (strain ATCC 50611 / Me49)	532	SUBCELLULAR LOCATION: Membrane {ECO:0000256|ARBA:ARBA00004167}; Single-pass membrane protein {ECO:0000256|ARBA:ARBA00004167}.
A0A125YQ93	A0A125YQ93_TOXGM	unreviewed	V-type proton ATPase subunit a	TGME49_232830	Toxoplasma gondii (strain ATCC 50611 / Me49)	909	SUBCELLULAR LOCATION: Membrane {ECO:0000256|ARBA:ARBA00004141}; Multi-pass membrane protein {ECO:0000256|ARBA:ARBA00004141}.
A0A125YQI6	A0A125YQI6_TOXGM	unreviewed	Uncharacterized protein	TGME49_210380	Toxoplasma gondii (strain ATCC 50611 / Me49)	657	SUBCELLULAR LOCATION: Membrane {ECO:0000256|ARBA:ARBA00004141}; Multi-pass membrane protein {ECO:0000256|ARBA:ARBA00004141}.
A0A125YQK6	A0A125YQK6_TOXGM	unreviewed	Uncharacterized protein	TGME49_320270	Toxoplasma gondii (strain ATCC 50611 / Me49)	711	SUBCELLULAR LOCATION: Membrane {ECO:0000256|ARBA:ARBA00004141}; Multi-pass membrane protein {ECO:0000256|ARBA:ARBA00004141}.
A0A125YR42	A0A125YR42_TOXGM	unreviewed	SAG-related sequence SRS10	SRS10 TGME49_295600	Toxoplasma gondii (strain ATCC 50611 / Me49)	173	membrane
A0A125YR49	A0A125YR49_TOXGM	unreviewed	H(+)-exporting diphosphatase (EC 7.1.3.1)	TGME49_248670	Toxoplasma gondii (strain ATCC 50611 / Me49)	816	SUBCELLULAR LOCATION: Membrane {ECO:0000256|ARBA:ARBA00004141}; Multi-pass membrane protein {ECO:0000256|ARBA:ARBA00004141}.
A0A125YS45	A0A125YS45_TOXGM	unreviewed	Carrier superfamily protein	TGME49_239080	Toxoplasma gondii (strain ATCC 50611 / Me49)	850	SUBCELLULAR LOCATION: Membrane {ECO:0000256|ARBA:ARBA00004141}; Multi-pass membrane protein {ECO:0000256|ARBA:ARBA00004141}.
A0A125YSC7	A0A125YSC7_TOXGM	unreviewed	Formate/nitrite transporter protein	TGME49_209800	Toxoplasma gondii (strain ATCC 50611 / Me49)	412	SUBCELLULAR LOCATION: Membrane {ECO:0000256|ARBA:ARBA00004141}; Multi-pass membrane protein {ECO:0000256|ARBA:ARBA00004141}.
A0A125YSM4	A0A125YSM4_TOXGM	unreviewed	DUF4149 domain-containing protein	TGME49_209720	Toxoplasma gondii (strain ATCC 50611 / Me49)	218	integral component of membrane
A0A125YSP7	A0A125YSP7_TOXGM	unreviewed	Uncharacterized protein	TGME49_280400	Toxoplasma gondii (strain ATCC 50611 / Me49)	1157	SUBCELLULAR LOCATION: Membrane {ECO:0000256|ARBA:ARBA00004141}; Multi-pass membrane protein {ECO:0000256|ARBA:ARBA00004141}.
A0A125YSW4	A0A125YSW4_TOXGM	unreviewed	Preprotein translocase Sec61, putative	TGME49_269980	Toxoplasma gondii (strain ATCC 50611 / Me49)	473	SUBCELLULAR LOCATION: Membrane {ECO:0000256|ARBA:ARBA00004141, ECO:0000256|RuleBase:RU003484}; Multi-pass membrane protein {ECO:0000256|ARBA:ARBA00004141, ECO:0000256|RuleBase:RU003484}.
A0A125YT51	A0A125YT51_TOXGM	unreviewed	TB2/DP1, HVA22 family protein	TGME49_257040	Toxoplasma gondii (strain ATCC 50611 / Me49)	217	SUBCELLULAR LOCATION: Membrane {ECO:0000256|RuleBase:RU362006}; Multi-pass membrane protein {ECO:0000256|RuleBase:RU362006}.
A0A125YTH3	A0A125YTH3_TOXGM	unreviewed	Uncharacterized protein	TGME49_255270	Toxoplasma gondii (strain ATCC 50611 / Me49)	317	SUBCELLULAR LOCATION: Membrane {ECO:0000256|ARBA:ARBA00004141}; Multi-pass membrane protein {ECO:0000256|ARBA:ARBA00004141}.
A0A125YTQ7	A0A125YTQ7_TOXGM	unreviewed	Uncharacterized protein	TGME49_287200	Toxoplasma gondii (strain ATCC 50611 / Me49)	211	SUBCELLULAR LOCATION: Membrane {ECO:0000256|ARBA:ARBA00004141}; Multi-pass membrane protein {ECO:0000256|ARBA:ARBA00004141}.
A0A125YTU2	A0A125YTU2_TOXGM	unreviewed	Cytochrome c1, heme protein	TGME49_246540	Toxoplasma gondii (strain ATCC 50611 / Me49)	398	SUBCELLULAR LOCATION: Membrane {ECO:0000256|ARBA:ARBA00004167}; Single-pass membrane protein {ECO:0000256|ARBA:ARBA00004167}. Mitochondrion inner membrane {ECO:0000256|ARBA:ARBA00004434}; Single-pass membrane protein {ECO:0000256|ARBA:ARBA00004434}.
A0A125YU36	A0A125YU36_TOXGM	unreviewed	Nmda receptor glutamate-binding chain	TGME49_309560	Toxoplasma gondii (strain ATCC 50611 / Me49)	265	SUBCELLULAR LOCATION: Membrane {ECO:0000256|ARBA:ARBA00004141}; Multi-pass membrane protein {ECO:0000256|ARBA:ARBA00004141}.
A0A125YUF8	A0A125YUF8_TOXGM	unreviewed	CDP-diacylglycerol--inositol 3-phosphatidyltransferase (EC 2.7.8.11)	TGME49_207710	Toxoplasma gondii (strain ATCC 50611 / Me49)	258	SUBCELLULAR LOCATION: Membrane {ECO:0000256|ARBA:ARBA00004141}; Multi-pass membrane protein {ECO:0000256|ARBA:ARBA00004141}.
A0A125YUL0	A0A125YUL0_TOXGM	unreviewed	Transmembrane protein	TGME49_238100	Toxoplasma gondii (strain ATCC 50611 / Me49)	240	SUBCELLULAR LOCATION: Membrane {ECO:0000256|ARBA:ARBA00004479, ECO:0000256|RuleBase:RU003827}; Single-pass type I membrane protein {ECO:0000256|ARBA:ARBA00004479, ECO:0000256|RuleBase:RU003827}.
A0A125YUN7	A0A125YUN7_TOXGM	unreviewed	Membrane protein, putative	TGME49_247630	Toxoplasma gondii (strain ATCC 50611 / Me49)	187	integral component of membrane
A0A125YUR2	A0A125YUR2_TOXGM	unreviewed	Membrane protein, putative	TGME49_202290	Toxoplasma gondii (strain ATCC 50611 / Me49)	349	integral component of membrane
A0A125YV30	A0A125YV30_TOXGM	unreviewed	Integral membrane protein, DUF56 family protein, putative	TGME49_315930	Toxoplasma gondii (strain ATCC 50611 / Me49)	157	Integral membrane protein, DUF56 family protein, putative
A0A125YV75	A0A125YV75_TOXGM	unreviewed	Uncharacterized protein	TGME49_319620	Toxoplasma gondii (strain ATCC 50611 / Me49)	878	SUBCELLULAR LOCATION: Membrane {ECO:0000256|ARBA:ARBA00004141}; Multi-pass membrane protein {ECO:0000256|ARBA:ARBA00004141}.
A0A125YVW4	A0A125YVW4_TOXGM	unreviewed	MC family transporter, putative	TGME49_249702	Toxoplasma gondii (strain ATCC 50611 / Me49)	287	SUBCELLULAR LOCATION: Membrane {ECO:0000256|ARBA:ARBA00004141}; Multi-pass membrane protein {ECO:0000256|ARBA:ARBA00004141}.
A0A125YW44	A0A125YW44_TOXGM	unreviewed	V-ATPase subunit c' proteolipid, putative	TGME49_291310	Toxoplasma gondii (strain ATCC 50611 / Me49)	205	SUBCELLULAR LOCATION: Membrane {ECO:0000256|ARBA:ARBA00004141}; Multi-pass membrane protein {ECO:0000256|ARBA:ARBA00004141}.
A0A125YW98	A0A125YW98_TOXGM	unreviewed	UDP-galactose transporter family protein	TGME49_254580	Toxoplasma gondii (strain ATCC 50611 / Me49)	413	SUBCELLULAR LOCATION: Membrane {ECO:0000256|ARBA:ARBA00004141}; Multi-pass membrane protein {ECO:0000256|ARBA:ARBA00004141}.
A0A125YWQ9	A0A125YWQ9_TOXGM	unreviewed	Uncharacterized protein	TGME49_222090	Toxoplasma gondii (strain ATCC 50611 / Me49)	133	SUBCELLULAR LOCATION: Membrane {ECO:0000256|ARBA:ARBA00004141}; Multi-pass membrane protein {ECO:0000256|ARBA:ARBA00004141}.
A0A125YWU7	A0A125YWU7_TOXGM	unreviewed	CBS domain-containing protein	TGME49_211350	Toxoplasma gondii (strain ATCC 50611 / Me49)	1720	SUBCELLULAR LOCATION: Membrane {ECO:0000256|ARBA:ARBA00004141}; Multi-pass membrane protein {ECO:0000256|ARBA:ARBA00004141}.
A0A125YXB7	A0A125YXB7_TOXGM	unreviewed	Uncharacterized protein	TGME49_267300	Toxoplasma gondii (strain ATCC 50611 / Me49)	265	SUBCELLULAR LOCATION: Membrane {ECO:0000256|ARBA:ARBA00004141}; Multi-pass membrane protein {ECO:0000256|ARBA:ARBA00004141}.
A0A125YXC4	A0A125YXC4_TOXGM	unreviewed	Uncharacterized protein	TGME49_295090	Toxoplasma gondii (strain ATCC 50611 / Me49)	735	SUBCELLULAR LOCATION: Membrane {ECO:0000256|ARBA:ARBA00004141}; Multi-pass membrane protein {ECO:0000256|ARBA:ARBA00004141}.
A0A125YXQ0	A0A125YXQ0_TOXGM	unreviewed	GalNac (EC 2.4.1.41)	TGME49_259530	Toxoplasma gondii (strain ATCC 50611 / Me49)	751	SUBCELLULAR LOCATION: Membrane {ECO:0000256|ARBA:ARBA00004606}; Single-pass type II membrane protein {ECO:0000256|ARBA:ARBA00004606}.
A0A125YXW3	A0A125YXW3_TOXGM	unreviewed	SNARE associated protein	TGME49_301350	Toxoplasma gondii (strain ATCC 50611 / Me49)	414	SUBCELLULAR LOCATION: Membrane {ECO:0000256|ARBA:ARBA00004141}; Multi-pass membrane protein {ECO:0000256|ARBA:ARBA00004141}.
A0A125YXW9	A0A125YXW9_TOXGM	unreviewed	Uncharacterized protein	TGME49_230840	Toxoplasma gondii (strain ATCC 50611 / Me49)	732	SUBCELLULAR LOCATION: Membrane {ECO:0000256|ARBA:ARBA00004141}; Multi-pass membrane protein {ECO:0000256|ARBA:ARBA00004141}.
A0A125YXX7	A0A125YXX7_TOXGM	unreviewed	Nmda1 protein	TGME49_249770	Toxoplasma gondii (strain ATCC 50611 / Me49)	339	SUBCELLULAR LOCATION: Membrane {ECO:0000256|ARBA:ARBA00004141}; Multi-pass membrane protein {ECO:0000256|ARBA:ARBA00004141}.
A0A125YY16	A0A125YY16_TOXGM	unreviewed	Autophagy protein 5	TGME49_230860	Toxoplasma gondii (strain ATCC 50611 / Me49)	903	SUBCELLULAR LOCATION: Preautophagosomal structure membrane {ECO:0000256|RuleBase:RU361202}; Peripheral membrane protein {ECO:0000256|RuleBase:RU361202}.
A0A125YY85	A0A125YY85_TOXGM	unreviewed	SAG-related sequence SRS57	SRS57 TGME49_308020	Toxoplasma gondii (strain ATCC 50611 / Me49)	385	integral component of membrane
A0A125YY92	A0A125YY92_TOXGM	unreviewed	PIG-P protein	TGME49_207980	Toxoplasma gondii (strain ATCC 50611 / Me49)	407	SUBCELLULAR LOCATION: Membrane {ECO:0000256|ARBA:ARBA00004141}; Multi-pass membrane protein {ECO:0000256|ARBA:ARBA00004141}.
A0A125YYF8	A0A125YYF8_TOXGM	unreviewed	PAP2_C domain-containing protein	TGME49_246490	Toxoplasma gondii (strain ATCC 50611 / Me49)	292	integral component of membrane
A0A125YYK4	A0A125YYK4_TOXGM	unreviewed	MC family transporter, putative	TGME49_208790	Toxoplasma gondii (strain ATCC 50611 / Me49)	310	SUBCELLULAR LOCATION: Membrane {ECO:0000256|ARBA:ARBA00004141}; Multi-pass membrane protein {ECO:0000256|ARBA:ARBA00004141}.
A0A125YYN4	A0A125YYN4_TOXGM	unreviewed	Carrier superfamily protein	TGME49_248320	Toxoplasma gondii (strain ATCC 50611 / Me49)	358	SUBCELLULAR LOCATION: Membrane {ECO:0000256|ARBA:ARBA00004141}; Multi-pass membrane protein {ECO:0000256|ARBA:ARBA00004141}.
A0A125YYS2	A0A125YYS2_TOXGM	unreviewed	Integral membrane protein, putative	TGME49_205490	Toxoplasma gondii (strain ATCC 50611 / Me49)	617	SUBCELLULAR LOCATION: Membrane {ECO:0000256|ARBA:ARBA00004141}; Multi-pass membrane protein {ECO:0000256|ARBA:ARBA00004141}.
A0A125YZ21	A0A125YZ21_TOXGM	unreviewed	Uncharacterized protein	TGME49_201880	Toxoplasma gondii (strain ATCC 50611 / Me49)	128	SUBCELLULAR LOCATION: Membrane {ECO:0000256|ARBA:ARBA00004167}; Single-pass membrane protein {ECO:0000256|ARBA:ARBA00004167}. Mitochondrion inner membrane {ECO:0000256|ARBA:ARBA00004434}; Single-pass membrane protein {ECO:0000256|ARBA:ARBA00004434}.
A0A125YZ44	A0A125YZ44_TOXGM	unreviewed	Uncharacterized protein	TGME49_266090	Toxoplasma gondii (strain ATCC 50611 / Me49)	451	SUBCELLULAR LOCATION: Membrane {ECO:0000256|ARBA:ARBA00004141}; Multi-pass membrane protein {ECO:0000256|ARBA:ARBA00004141}.
A0A125YZ71	A0A125YZ71_TOXGM	unreviewed	GDT1 family protein	TGME49_319550	Toxoplasma gondii (strain ATCC 50611 / Me49)	343	SUBCELLULAR LOCATION: Membrane {ECO:0000256|ARBA:ARBA00004141, ECO:0000256|RuleBase:RU365102}; Multi-pass membrane protein {ECO:0000256|ARBA:ARBA00004141, ECO:0000256|RuleBase:RU365102}.
A0A125YZA5	A0A125YZA5_TOXGM	unreviewed	RER1 protein, putative	TGME49_291300	Toxoplasma gondii (strain ATCC 50611 / Me49)	222	SUBCELLULAR LOCATION: Membrane {ECO:0000256|ARBA:ARBA00004141}; Multi-pass membrane protein {ECO:0000256|ARBA:ARBA00004141}.
A0A125YZH9	A0A125YZH9_TOXGM	unreviewed	Aquaporin 1	TGME49_215450	Toxoplasma gondii (strain ATCC 50611 / Me49)	263	SUBCELLULAR LOCATION: Membrane {ECO:0000256|ARBA:ARBA00004141}; Multi-pass membrane protein {ECO:0000256|ARBA:ARBA00004141}.
A0A125YZI5	A0A125YZI5_TOXGM	unreviewed	Uncharacterized protein	TGME49_280670	Toxoplasma gondii (strain ATCC 50611 / Me49)	369	SUBCELLULAR LOCATION: Membrane {ECO:0000256|ARBA:ARBA00004141}; Multi-pass membrane protein {ECO:0000256|ARBA:ARBA00004141}.
A0A139XWW8	A0A139XWW8_TOXGO	unreviewed	Transmembrane protein 147	TGARI_226270	Toxoplasma gondii ARI	258	SUBCELLULAR LOCATION: Cell membrane {ECO:0000256|ARBA:ARBA00004651}; Multi-pass membrane protein {ECO:0000256|ARBA:ARBA00004651}. Endoplasmic reticulum membrane {ECO:0000256|ARBA:ARBA00004477}; Multi-pass membrane protein {ECO:0000256|ARBA:ARBA00004477}. Membrane {ECO:0000256|ARBA:ARBA00004141}; Multi-pass membrane protein {ECO:0000256|ARBA:ARBA00004141}.
A0A139Y2F8	A0A139Y2F8_TOXGO	unreviewed	Putative ATP-binding surface antigen	TGARI_288960	Toxoplasma gondii ARI	3519	Putative ATP-binding surface antigen
A0A139Y3N1	A0A139Y3N1_TOXGO	unreviewed	SAG-related sequence protein SRS38B (Fragment)	TGARI_369060	Toxoplasma gondii ARI	216	membrane
A0A139Y8A9	A0A139Y8A9_TOXGO	unreviewed	Transmembrane surface antigen TSA1	TGARI_311670	Toxoplasma gondii ARI	440	integral component of membrane
A0A2T6IH29	A0A2T6IH29_TOXGO	unreviewed	Putative transmembrane protein	TGBR9_211640	Toxoplasma gondii TgCATBr9	2862	SUBCELLULAR LOCATION: Cell membrane {ECO:0000256|ARBA:ARBA00004651}; Multi-pass membrane protein {ECO:0000256|ARBA:ARBA00004651}. Membrane {ECO:0000256|ARBA:ARBA00004141}; Multi-pass membrane protein {ECO:0000256|ARBA:ARBA00004141}.
A0A2T6ILN5	A0A2T6ILN5_TOXGO	unreviewed	Surface antigen repeat-containing protein	TGBR9_213392A	Toxoplasma gondii TgCATBr9	1448	Surface antigen repeat-containing protein
A0A2T6ILR4	A0A2T6ILR4_TOXGO	unreviewed	Surface antigen repeat-containing protein	TGBR9_212880B	Toxoplasma gondii TgCATBr9	5473	Surface antigen repeat-containing protein
A0A2T6IRS5	A0A2T6IRS5_TOXGO	unreviewed	Male gamete fusion factor	TGBR9_285940	Toxoplasma gondii TgCATBr9	1189	SUBCELLULAR LOCATION: Cell membrane {ECO:0000256|ARBA:ARBA00004251}; Single-pass type I membrane protein {ECO:0000256|ARBA:ARBA00004251}. Membrane {ECO:0000256|ARBA:ARBA00004479}; Single-pass type I membrane protein {ECO:0000256|ARBA:ARBA00004479}.
A0A2T6J0H4	A0A2T6J0H4_TOXGO	unreviewed	Putative transmembrane protein	TGBR9_226710	Toxoplasma gondii TgCATBr9	297	SUBCELLULAR LOCATION: Cell membrane {ECO:0000256|ARBA:ARBA00004651}; Multi-pass membrane protein {ECO:0000256|ARBA:ARBA00004651}. Membrane {ECO:0000256|ARBA:ARBA00004141}; Multi-pass membrane protein {ECO:0000256|ARBA:ARBA00004141}.
A0A425HMN2	A0A425HMN2_TOXGO	unreviewed	SAG-related sequence protein SRS19D	TGCAST_389730	Toxoplasma gondii CAST	389	membrane
A0A452CSY6	A0A452CSY6_TOXGO	unreviewed	Bradyzoite pseudokinase 1 (EC 2.7.99.1)	BPK1	Toxoplasma gondii RH	319	Bradyzoite pseudokinase
A0A7J6JXP6	A0A7J6JXP6_TOXGO	unreviewed	AP complex subunit sigma	TGRH88_052610	Toxoplasma gondii	143	SUBCELLULAR LOCATION: Cell membrane {ECO:0000256|ARBA:ARBA00004236}. Membrane, coated pit {ECO:0000256|ARBA:ARBA00004277}; Peripheral membrane protein {ECO:0000256|ARBA:ARBA00004277}; Cytoplasmic side {ECO:0000256|ARBA:ARBA00004277}.
A0A7J6JY70	A0A7J6JY70_TOXGO	unreviewed	Transmembrane surface antigen TSA1	TGRH88_051040	Toxoplasma gondii	440	integral component of membrane
A0A7J6K0E1	A0A7J6K0E1_TOXGO	unreviewed	3'(2'),5'-bisphosphate nucleotidase	TGRH88_043450	Toxoplasma gondii	327	plasma membrane
A0A7J6K0E7	A0A7J6K0E7_TOXGO	unreviewed	Transmembrane protein 147	TGRH88_045840	Toxoplasma gondii	258	SUBCELLULAR LOCATION: Cell membrane {ECO:0000256|ARBA:ARBA00004651}; Multi-pass membrane protein {ECO:0000256|ARBA:ARBA00004651}. Endoplasmic reticulum membrane {ECO:0000256|ARBA:ARBA00004477}; Multi-pass membrane protein {ECO:0000256|ARBA:ARBA00004477}. Membrane {ECO:0000256|ARBA:ARBA00004141}; Multi-pass membrane protein {ECO:0000256|ARBA:ARBA00004141}.
A0A7J6K110	A0A7J6K110_TOXGO	unreviewed	Uncharacterized protein	TGRH88_046300	Toxoplasma gondii	297	SUBCELLULAR LOCATION: Cell membrane {ECO:0000256|ARBA:ARBA00004651}; Multi-pass membrane protein {ECO:0000256|ARBA:ARBA00004651}. Membrane {ECO:0000256|ARBA:ARBA00004141}; Multi-pass membrane protein {ECO:0000256|ARBA:ARBA00004141}.
A0A7J6K2M7	A0A7J6K2M7_TOXGO	unreviewed	Adaptor complexes medium subunit family protein	TGRH88_075240	Toxoplasma gondii	619	SUBCELLULAR LOCATION: Cell membrane {ECO:0000256|ARBA:ARBA00004236}. Membrane, coated pit {ECO:0000256|ARBA:ARBA00004277}; Peripheral membrane protein {ECO:0000256|ARBA:ARBA00004277}; Cytoplasmic side {ECO:0000256|ARBA:ARBA00004277}.
A0A7J6K5U7	A0A7J6K5U7_TOXGO	unreviewed	Ion channel protein	TGRH88_078650	Toxoplasma gondii	2971	SUBCELLULAR LOCATION: Cell membrane {ECO:0000256|ARBA:ARBA00004651}; Multi-pass membrane protein {ECO:0000256|ARBA:ARBA00004651}. Membrane {ECO:0000256|ARBA:ARBA00004141}; Multi-pass membrane protein {ECO:0000256|ARBA:ARBA00004141}.
A0A7J6K781	A0A7J6K781_TOXGO	unreviewed	CrcB family protein	TGRH88_081560	Toxoplasma gondii	696	SUBCELLULAR LOCATION: Membrane {ECO:0000256|ARBA:ARBA00004141}; Multi-pass membrane protein {ECO:0000256|ARBA:ARBA00004141}.
A0A7J6K7H4	A0A7J6K7H4_TOXGO	unreviewed	Cyclic nucleotide-binding domain-containing protein	TGRH88_035480	Toxoplasma gondii	2079	membrane
A0A7J6K8R6	A0A7J6K8R6_TOXGO	unreviewed	Uncharacterized protein	TGRH88_026090	Toxoplasma gondii	1189	SUBCELLULAR LOCATION: Cell membrane {ECO:0000256|ARBA:ARBA00004251}; Single-pass type I membrane protein {ECO:0000256|ARBA:ARBA00004251}. Membrane {ECO:0000256|ARBA:ARBA00004479}; Single-pass type I membrane protein {ECO:0000256|ARBA:ARBA00004479}.
A0A7J6K951	A0A7J6K951_TOXGO	unreviewed	Ion channel protein	TGRH88_031800	Toxoplasma gondii	2540	SUBCELLULAR LOCATION: Cell membrane {ECO:0000256|ARBA:ARBA00004651}; Multi-pass membrane protein {ECO:0000256|ARBA:ARBA00004651}. Membrane {ECO:0000256|ARBA:ARBA00004141}; Multi-pass membrane protein {ECO:0000256|ARBA:ARBA00004141}.
A0A7J6K990	A0A7J6K990_TOXGO	unreviewed	Surface antigen repeat-containing protein	TGRH88_024630	Toxoplasma gondii	2317	Surface antigen repeat-containing protein
A0A7J6KAZ5	A0A7J6KAZ5_TOXGO	unreviewed	Surface antigen repeat-containing protein	TGRH88_024260	Toxoplasma gondii	6672	Surface antigen repeat-containing protein
A0A7J6KCA8	A0A7J6KCA8_TOXGO	unreviewed	Variable surface lipoprotein	TGRH88_017820	Toxoplasma gondii	862	Variable surface lipoprotein
A0A7J6KF26	A0A7J6KF26_TOXGO	unreviewed	Uncharacterized protein	TGRH88_008520	Toxoplasma gondii	2883	SUBCELLULAR LOCATION: Cell membrane {ECO:0000256|ARBA:ARBA00004651}; Multi-pass membrane protein {ECO:0000256|ARBA:ARBA00004651}. Membrane {ECO:0000256|ARBA:ARBA00004141}; Multi-pass membrane protein {ECO:0000256|ARBA:ARBA00004141}.
A1E140	A1E140_TOXGO	unreviewed	Rhoptry protein 18	ROP18	Toxoplasma gondii	586	membrane
B3VQI5	B3VQI5_TOXGO	unreviewed	Micronemal protein 16 (Microneme protein MIC16)	MIC16 TGRH88_014380	Toxoplasma gondii	668	integral component of membrane
B6K8M5	B6K8M5_TOXGV	unreviewed	Transmembrane surface antigen TSA1	BN1205_095680 TGVEG_311670	Toxoplasma gondii (strain ATCC 50861 / VEG)	440	integral component of membrane
B6K9M7	AMA1L_TOXGV	reviewed	Apical membrane antigen 1-like protein (SporoAMA1) [Cleaved into: Apical membrane antigen 1-like protein, soluble form]	TGVEG_315730	Toxoplasma gondii (strain ATCC 50861 / VEG)	651	SUBCELLULAR LOCATION: Cell membrane {ECO:0000250}; Single-pass type I membrane protein {ECO:0000305}. Secreted {ECO:0000250}. Note=Initially localizes to micronemes, specialized secretory organelles of apicomplexan parasites important for host cell invasion. Relocalizes to the surface membrane upon host invasion. {ECO:0000250}.
B6KEU8	GRA3_TOXGO	reviewed	Dense granule protein 3 (P30)	GRA3 Tg556	Toxoplasma gondii	222	SUBCELLULAR LOCATION: Cytoplasm {ECO:0000269|PubMed:16149193, ECO:0000269|PubMed:19127325}. Host endoplasmic reticulum {ECO:0000269|PubMed:16149193, ECO:0000269|PubMed:19127325}. Parasitophorous vacuole membrane {ECO:0000255}; Multi-pass membrane protein {ECO:0000255}. Note=Located in dense granules of tachyzoites. Upon infection, secreted to the PVM. {ECO:0000255, ECO:0000269|PubMed:16149193, EC…
B6KJ32	RON4_TOXGO	reviewed	Rhoptry neck protein 4 (Tg65)	RON4	Toxoplasma gondii	984	SUBCELLULAR LOCATION: Secreted {ECO:0000269|PubMed:16002398}. Parasitophorous vacuole membrane {ECO:0000269|PubMed:16002398}. Note=Located prominently at the junction of the body and neck portion of the rhoptry organelle in tachyzoites and bradyzoites. Upon infection, associates with the parasitophorous vacuolar membrane (PVM).
B6KK34	B6KK34_TOXGV	unreviewed	SAG-related sequence SRS29C (SRS29C)	BN1205_022060 TGVEG_233480	Toxoplasma gondii (strain ATCC 50861 / VEG)	372	membrane
B6KLP1	RON22_TOXGM	reviewed	Rhoptry neck protein 2-like protein 2 (Sporozoite-specific paralog of RON2) (SporoRON2)	RON2L2 TGME49_065120	Toxoplasma gondii (strain ATCC 50611 / Me49)	1167	SUBCELLULAR LOCATION: Secreted {ECO:0000250}. Host cell membrane {ECO:0000250}; Single-pass type I membrane protein {ECO:0000305}; Cytoplasmic side {ECO:0000250}. Note=Initially localizes to rhoptries, specialized secretory organelles of apicomplexan parasites important for host cell invasion. Upon host invasion by tachyzoites, the protein is injected into the host cell, where it spans the host c…
B6KV60	RON2_TOXGM	reviewed	Rhoptry neck protein 2 (145 kDa AMA1-associated protein) (AAP145)	RON2 TGME49_100100 TGME49_300100	Toxoplasma gondii (strain ATCC 50611 / Me49)	1479	SUBCELLULAR LOCATION: Secreted {ECO:0000269|PubMed:21347343}. Cytoplasm {ECO:0000269|PubMed:21347343}. Host cell membrane {ECO:0000269|PubMed:16244709, ECO:0000269|PubMed:19247437, ECO:0000269|PubMed:21347343}; Single-pass type I membrane protein {ECO:0000305}; Cytoplasmic side {ECO:0000269|PubMed:21347343}. Note=Initially localizes to rhoptries, specialized secretory organelles of apicomplexan p…
B7UDF2	B7UDF2_TOXGO	unreviewed	Rhoptry neck protein 8 (Rhoptry neck protein RON8)	TGRH88_017600	Toxoplasma gondii	2980	integral component of membrane
B8Y892	B8Y892_TOXGO	unreviewed	Choline kinase (EC 2.7.1.32) (Phosphotransferase enzyme family protein)	TGRH88_006560	Toxoplasma gondii	630	membrane
B9PMS1	B9PMS1_TOXGV	unreviewed	Putative transmembrane protein	BN1205_067760 TGVEG_226710	Toxoplasma gondii (strain ATCC 50861 / VEG)	297	SUBCELLULAR LOCATION: Cell membrane {ECO:0000256|ARBA:ARBA00004651}; Multi-pass membrane protein {ECO:0000256|ARBA:ARBA00004651}. Membrane {ECO:0000256|ARBA:ARBA00004141}; Multi-pass membrane protein {ECO:0000256|ARBA:ARBA00004141}.
B9Q7Z4	B9Q7Z4_TOXGV	unreviewed	Transmembrane protein 147	BN1205_067250 TGVEG_226270	Toxoplasma gondii (strain ATCC 50861 / VEG)	258	SUBCELLULAR LOCATION: Cell membrane {ECO:0000256|ARBA:ARBA00004651}; Multi-pass membrane protein {ECO:0000256|ARBA:ARBA00004651}. Endoplasmic reticulum membrane {ECO:0000256|ARBA:ARBA00004477}; Multi-pass membrane protein {ECO:0000256|ARBA:ARBA00004477}. Membrane {ECO:0000256|ARBA:ARBA00004141}; Multi-pass membrane protein {ECO:0000256|ARBA:ARBA00004141}.
B9QDW6	B9QDW6_TOXGV	unreviewed	ATP-binding surface antigen, putative (Putative ATP-binding surface antigen)	BN1205_082820 TGVEG_288960	Toxoplasma gondii (strain ATCC 50861 / VEG)	3519	membrane
B9QPN9	B9QPN9_TOXGV	unreviewed	SAG-related sequence SRS35B (p18 surface antigen)	BN1205_079850 TGVEG_280580	Toxoplasma gondii (strain ATCC 50861 / VEG)	180	membrane
C7E5T1	C7E5T1_TOXGO	unreviewed	Major surface antigen	SAG1	Toxoplasma gondii	336	membrane
D0V559	D0V559_TOXGO	unreviewed	Rhoptry neck protein 5		Toxoplasma gondii	1699	membrane
E2IPQ4	E2IPQ4_TOXGO	unreviewed	SAG-3		Toxoplasma gondii	385	integral component of membrane
F6N7K6	PSD2_TOXGG	reviewed	Phosphatidylserine decarboxylase 2 proenzyme (EC 4.1.1.65) (Phosphatidylserine decarboxylase 1, parasitophorous vacuolar) [Cleaved into: Phosphatidylserine decarboxylase 2 beta chain; Phosphatidylserine decarboxylase 2 alpha chain]	PSD1pv PSD1 TGGT1_269920	Toxoplasma gondii (strain ATCC 50853 / GT1)	968	SUBCELLULAR LOCATION: Parasitophorous vacuole {ECO:0000269|PubMed:22563079, ECO:0000269|PubMed:24429285}. Cytoplasmic vesicle, secretory vesicle {ECO:0000269|PubMed:22563079}. Note=The protein is stored in dense granules in the parasite and secreted into the parasitophorous vacuole via these granules after host infection. {ECO:0000269|PubMed:22563079}.
G4XMZ5	G4XMZ5_TOXGO	unreviewed	Rhoptry protein 7		Toxoplasma gondii	575	Rhoptry protein 7
O00834	MIC1_TOXGO	reviewed	Micronemal protein 1	MIC1	Toxoplasma gondii	456	SUBCELLULAR LOCATION: Cytoplasmic vesicle, secretory vesicle, microneme {ECO:0000269|PubMed:11157983, ECO:0000269|PubMed:15684324, ECO:0000269|PubMed:18818666}.
O00933	GRA7_TOXGO	reviewed	Dense granule protein 7 (Protein GRA 7) (29 kDa excretory dense granule protein) (p29)	GRA7	Toxoplasma gondii	236	SUBCELLULAR LOCATION: Secreted. Parasitophorous vacuole lumen. Parasitophorous vacuole membrane. Cytoplasmic vesicle, secretory vesicle. Note=Located in dense granules of tachyzoites. Upon infection, secreted into the parasitophorous vacuole (PV).
O00934	MYOA_TOXGO	reviewed	Myosin-A (MyoA) (TgM-A)		Toxoplasma gondii	831	SUBCELLULAR LOCATION: Cell membrane {ECO:0000269|PubMed:10749937}; Peripheral membrane protein {ECO:0000269|PubMed:10749937}; Cytoplasmic side {ECO:0000269|PubMed:10749937}. Note=Tightly associated with the plasma membrane.
O15721	O15721_TOXGO	unreviewed	p18 surface antigen	SAG4.2	Toxoplasma gondii	180	p18 surface antigen
P13404	GRA2_TOXGO	reviewed	Dense granule protein 2 (Protein GRA 2) (28 kDa antigen) (GP28.5)	GRA2	Toxoplasma gondii	185	SUBCELLULAR LOCATION: Parasitophorous vacuole. Note=Located in dense granules of tachyzoites. Upon infection, secreted, in a Ca(2+)-dependent manner, into the parasitophorous vacuole (PV) and targeted to the microvillus membranous network.
Q07828	GRA5_TOXGO	reviewed	Dense granule protein 5 (Protein GRA 5) (p21)	GRA5	Toxoplasma gondii	120	SUBCELLULAR LOCATION: Secreted. Parasitophorous vacuole lumen. Parasitophorous vacuole membrane. Cytoplasmic vesicle, secretory vesicle. Note=Located in dense granules of tachyzoites. Upon infection, secreted into the cyst and the parasitophorous vacuole (PV).
Q1JTJ4	Q1JTJ4_TOXGO	unreviewed	Gpi-anchored surface bsr4-related antigen	TgIa.0200	Toxoplasma gondii	312	integral component of membrane
Q27002	GRA4_TOXGO	reviewed	Dense granule protein 4 (Protein GRA 4) (Antigen H11)	GRA4 H11	Toxoplasma gondii	345	SUBCELLULAR LOCATION: Secreted. Parasitophorous vacuole lumen. Parasitophorous vacuole membrane. Cytoplasmic vesicle, secretory vesicle. Note=Located in dense granules of tachyzoites. Upon infection, secreted into the parasitophorous vacuole (PV) and targeted to the microvillus membranous network.
Q27003	GRA6_TOXGO	reviewed	Dense granule protein 6 (Protein GRA 6) (Antigen p32) (Protein p33)	GRA6 TG24	Toxoplasma gondii	230	SUBCELLULAR LOCATION: Secreted. Parasitophorous vacuole lumen. Parasitophorous vacuole membrane. Cytoplasmic vesicle, secretory vesicle. Note=Located in dense granules of tachyzoites. Upon infection, secreted into the parasitophorous vacuole (PV) and targeted to the microvillus membranous network.
Q27005	Q27005_TOXGO	unreviewed	54-kDa antigen (Fragment)	54-kda antigen	Toxoplasma gondii	537	54-kDa antigen
Q27893	NTP1_TOXGO	reviewed	Nucleoside-triphosphatase 1 (EC 3.6.1.15) (NTPase-I) (Nucleoside triphosphate hydrolase 1) (Nucleoside-triphosphatase I)	NTP3	Toxoplasma gondii	628	SUBCELLULAR LOCATION: Secreted. Parasitophorous vacuole. Note=Found in host cell parasitophorous vacuole.
Q27895	NTP2_TOXGO	reviewed	Nucleoside-triphosphatase 2 (EC 3.6.1.15) (NTPase-II) (Nucleoside triphosphate hydrolase 2) (Nucleoside-triphosphatase II)	NTP1	Toxoplasma gondii	628	SUBCELLULAR LOCATION: Secreted. Parasitophorous vacuole. Note=Found in host cell parasitophorous vacuole.
Q2PAY2	Q2PAY2_TOXGO	unreviewed	Rhoptry kinase family protein (Rhoptry protein 18) (Rhoptry protein ROP18)	rop18 ROP18 TGRH88_034260	Toxoplasma gondii	554	Rhoptry kinase family protein
Q2PAY3	Q2PAY3_TOXGO	unreviewed	Rhoptry protein 17	rop17	Toxoplasma gondii	608	Rhoptry protein 17
Q45W11	Q45W11_TOXGO	unreviewed	Putative ATP-binding cassette protein	ABC.H3	Toxoplasma gondii	307	SUBCELLULAR LOCATION: Membrane {ECO:0000256|ARBA:ARBA00004141}; Multi-pass membrane protein {ECO:0000256|ARBA:ARBA00004141}.
Q45W15	Q45W15_TOXGO	unreviewed	ATP-binding cassette, sub-family G, member 5	ABC.G5	Toxoplasma gondii	999	SUBCELLULAR LOCATION: Membrane {ECO:0000256|ARBA:ARBA00004141}; Multi-pass membrane protein {ECO:0000256|ARBA:ARBA00004141}.
Q45W16	Q45W16_TOXGO	unreviewed	ATP-binding cassette, sub-family G, member 4	ABC.G4	Toxoplasma gondii	992	SUBCELLULAR LOCATION: Membrane {ECO:0000256|ARBA:ARBA00004141}; Multi-pass membrane protein {ECO:0000256|ARBA:ARBA00004141}.
Q45W17	Q45W17_TOXGO	unreviewed	ATP-binding cassette, sub-family G, member 3	ABC.G3	Toxoplasma gondii	812	SUBCELLULAR LOCATION: Membrane {ECO:0000256|ARBA:ARBA00004141}; Multi-pass membrane protein {ECO:0000256|ARBA:ARBA00004141}.
Q45W18	Q45W18_TOXGO	unreviewed	ATP-binding cassette, sub-family G, member 1	ABC.G1	Toxoplasma gondii	794	SUBCELLULAR LOCATION: Membrane {ECO:0000256|ARBA:ARBA00004141}; Multi-pass membrane protein {ECO:0000256|ARBA:ARBA00004141}.
Q45W21	Q45W21_TOXGO	unreviewed	ATP-binding cassette, sub-family G, member 2	ABC.G2	Toxoplasma gondii	766	SUBCELLULAR LOCATION: Membrane {ECO:0000256|ARBA:ARBA00004141}; Multi-pass membrane protein {ECO:0000256|ARBA:ARBA00004141}.
Q5Y808	ROP4_TOXGO	reviewed	Rhoptry protein 4	ROP4 TgIa.0490	Toxoplasma gondii	578	SUBCELLULAR LOCATION: Secreted {ECO:0000269|PubMed:15470260}. Parasitophorous vacuole membrane {ECO:0000269|PubMed:15470260}. Note=Localized to rhoptries which are secretory organelles at the apical end of the parasite and secreted during host cell invasion when it becomes associated with the parasitophorous vacuole membrane.
Q695T8	RHBL4_TOXGO	reviewed	Rhomboid-like protease 4 (EC 3.4.21.105)	ROM4	Toxoplasma gondii	641	SUBCELLULAR LOCATION: Membrane {ECO:0000269|PubMed:15753289}; Multi-pass membrane protein {ECO:0000269|PubMed:15753289}. Note=Uniformly distributed at the surface of intracellular and extracellular tachyzoites.
Q695T9	RHBL2_TOXGO	reviewed	Rhomboid-like protease 2 (EC 3.4.21.105)	ROM2	Toxoplasma gondii	283	SUBCELLULAR LOCATION: Membrane {ECO:0000305}; Multi-pass membrane protein {ECO:0000305}.
Q695U0	RHBL1_TOXGO	reviewed	Rhomboid-like protease 1 (EC 3.4.21.105)	ROM1	Toxoplasma gondii	293	SUBCELLULAR LOCATION: Cytoplasmic vesicle, secretory vesicle, microneme membrane {ECO:0000269|PubMed:15753289}; Multi-pass membrane protein {ECO:0000269|PubMed:15753289}. Note=Detected in micronemes in intracellular and extracellular tachyzoites, together with MIC2.
Q6GV23	RHBL5_TOXGO	reviewed	Rhomboid-like protease 5 (EC 3.4.21.105) (Microneme protein protease 1) (MPP-1)	ROM5 MPP1	Toxoplasma gondii	841	SUBCELLULAR LOCATION: Membrane {ECO:0000269|PubMed:15753289}; Multi-pass membrane protein {ECO:0000269|PubMed:15753289}. Note=Detected primarily at the posterior surface of intracellular tachyzoites. Detected in patches on the cell surface of extracellular tachyzoites. Concentrated at the posterior end of tachyzoites after induction of microneme secretion prior to invasion of host cells.
Q6IUY1	RHBL3_TOXGO	reviewed	Rhomboid-like protease 3 (EC 3.4.21.105)	ROM3	Toxoplasma gondii	263	SUBCELLULAR LOCATION: Membrane {ECO:0000305}; Multi-pass membrane protein {ECO:0000305}.
Q6WAX2	Q6WAX2_TOXGO	unreviewed	SAG5A (Surface antigen 5A)	SAG5A	Toxoplasma gondii	362	membrane
Q7YWC4	Q7YWC4_TOXGO	unreviewed	Putative GPI-anchored surface BSR4-related antigen		Toxoplasma gondii	369	membrane
Q8I8I2	Q8I8I2_TOXGO	unreviewed	Fructose-bisphosphate aldolase (EC 4.1.2.13)	ald-1	Toxoplasma gondii	363	Fructose-bisphosphate aldolase
Q8MMZ7	KGP_TOXGO	reviewed	cGMP-dependent protein kinase (EC 2.7.11.12) (TgPKG)	PKG	Toxoplasma gondii	994	SUBCELLULAR LOCATION: Cytoplasm {ECO:0000269|PubMed:31235476}. Membrane {ECO:0000269|PubMed:31235476}; Peripheral membrane protein {ECO:0000305}; Cytoplasmic side {ECO:0000305}.; SUBCELLULAR LOCATION: [Isoform 1]: Cell membrane {ECO:0000269|PubMed:11834729, ECO:0000269|PubMed:28465425}; Lipid-anchor {ECO:0000269|PubMed:11897122}. Note=Membrane localization is essential to regulate parasite invasi…
Q8N003	Q8N003_TOXGO	unreviewed	Putative bradyzoite-specific surface protein (SAG-related sequence SRS16B)	SRS9 TGRH88_006920	Toxoplasma gondii	398	membrane
Q95NL6	Q95NL6_TOXGO	unreviewed	Bradyzoite surface antigen BSR4 (Fragment)	BSR4	Toxoplasma gondii	385	membrane
Q95UY9	Q95UY9_TOXGO	unreviewed	Trypsin inhibitor	TI	Toxoplasma gondii	325	Trypsin inhibitor
Q963B8	Q963B8_TOXGO	unreviewed	60S acidic ribosomal protein P0	P0	Toxoplasma gondii	314	ribosome
Q9BH78	Q9BH78_TOXGO	unreviewed	Bradyzoite surface antigen (SAG-related sequence SRS35A)	SAG4 TGRH88_032820	Toxoplasma gondii	172	Bradyzoite surface antigen
Q9BJ41	Q9BJ41_TOXGO	unreviewed	Bradyzoite surface antigen	SAG4	Toxoplasma gondii	172	integral component of membrane
Q9GRG4	Q9GRG4_TOXGO	unreviewed	MIC3 microneme protein (Micronemal protein)	MIC3 mic3	Toxoplasma gondii	359	MIC3 microneme protein
Q9GSE3	Q9GSE3_TOXGO	unreviewed	SAG2-related antigen SAG2E		Toxoplasma gondii	340	membrane
Q9GSE9	Q9GSE9_TOXGO	unreviewed	p35 surface antigen		Toxoplasma gondii	378	p35 surface antigen
Q9GV97	Q9GV97_TOXGO	unreviewed	Plasma membrane ATPase (EC 7.1.2.1)	PMA1	Toxoplasma gondii	1039	SUBCELLULAR LOCATION: Cell membrane {ECO:0000256|RuleBase:RU362083}; Multi-pass membrane protein {ECO:0000256|RuleBase:RU362083}.
Q9XYF6	MYOD_TOXGO	reviewed	Myosin-D (MyoD) (TgM-D)		Toxoplasma gondii	822	SUBCELLULAR LOCATION: Cell membrane; Peripheral membrane protein. Cytoplasm.
Q9XYH0	Q9XYH0_TOXGO	unreviewed	SAG-related sequence SRS11 (SAG2 related antigen SAG2B)	TgIb.1210 TGRH88_022160	Toxoplasma gondii	190	membrane
S7UIG0	S7UIG0_TOXGG	unreviewed	Variable surface lipoprotein	TGGT1_306350	Toxoplasma gondii (strain ATCC 50853 / GT1)	884	Variable surface lipoprotein
S7UQ33	S7UQ33_TOXGG	unreviewed	Uncharacterized protein	TGGT1_237230	Toxoplasma gondii (strain ATCC 50853 / GT1)	213	integral component of membrane
S7UQV8	UGO_TOXGG	reviewed	Unique GC organizer UGO	UGO TGGT1_238390	Toxoplasma gondii (strain ATCC 50853 / GT1)	2122	SUBCELLULAR LOCATION: Cell membrane {ECO:0000305|PubMed:30742070}; Multi-pass membrane protein {ECO:0000255}. Note=In intracellular tachyzoites, localizes to the apical cap, to the cytoplasm in disperse foci and to the residual body. {ECO:0000269|PubMed:30742070}.
S7VVK4	GCY_TOXGG	reviewed	Guanylate cyclase (TgGC) (EC 4.6.1.2) (Guanylyl cyclase) (TgATPaseP-GC)	GC TGGT1_254370	Toxoplasma gondii (strain ATCC 50853 / GT1)	4367	SUBCELLULAR LOCATION: Cell membrane {ECO:0000269|PubMed:30449726, ECO:0000269|PubMed:30742070, ECO:0000269|PubMed:30992368, ECO:0000269|PubMed:31235476}; Multi-pass membrane protein {ECO:0000255}. Note=Localizes to the apical cap in extracellular tachyzoites (PubMed:30449726, PubMed:30992368). During tachyzoite intracellular replication in the host cell, localizes to the apical cap, to the cytopl…
S7VVL5	S7VVL5_TOXGG	unreviewed	Uncharacterized protein	TGGT1_254470	Toxoplasma gondii (strain ATCC 50853 / GT1)	732	integral component of membrane
S7WII9	CDC50_TOXGG	reviewed	CDC50-related protein CDC50.1	CDC50.1 TGGT1_230820	Toxoplasma gondii (strain ATCC 50853 / GT1)	524	SUBCELLULAR LOCATION: Membrane {ECO:0000305|PubMed:30742070}; Multi-pass membrane protein {ECO:0000255}. Note=In intracellular tachyzoites, localizes to the apical cap, to the cytoplasm in disperse foci and to the residual body. {ECO:0000269|PubMed:30742070}.
S7WKK8	S7WKK8_TOXGG	unreviewed	Uncharacterized protein	TGGT1_270700	Toxoplasma gondii (strain ATCC 50853 / GT1)	295	integral component of membrane
S8EMX2	S8EMX2_TOXGM	unreviewed	Rhoptry kinase family protein (Incomplete catalytic triad)	TGME49_308093	Toxoplasma gondii (strain ATCC 50611 / Me49)	538	Rhoptry kinase family protein (Incomplete catalytic triad)
S8ENM3	S8ENM3_TOXGM	unreviewed	Uncharacterized protein	TGME49_247370	Toxoplasma gondii (strain ATCC 50611 / Me49)	1261	SUBCELLULAR LOCATION: Membrane {ECO:0000256|ARBA:ARBA00004141}; Multi-pass membrane protein {ECO:0000256|ARBA:ARBA00004141}.
S8EQS5	S8EQS5_TOXGM	unreviewed	Rhoptry kinase family protein (Incomplete catalytic triad)	TGME49_308096	Toxoplasma gondii (strain ATCC 50611 / Me49)	538	Rhoptry kinase family protein
S8EQX7	S8EQX7_TOXGM	unreviewed	Carrier superfamily protein	TGME49_218770	Toxoplasma gondii (strain ATCC 50611 / Me49)	721	SUBCELLULAR LOCATION: Membrane {ECO:0000256|ARBA:ARBA00004141}; Multi-pass membrane protein {ECO:0000256|ARBA:ARBA00004141}.
S8ERH2	S8ERH2_TOXGM	unreviewed	STAS domain-containing protein	TGME49_313020	Toxoplasma gondii (strain ATCC 50611 / Me49)	1120	SUBCELLULAR LOCATION: Membrane {ECO:0000256|ARBA:ARBA00004141}; Multi-pass membrane protein {ECO:0000256|ARBA:ARBA00004141}.
S8ERU4	S8ERU4_TOXGM	unreviewed	Uncharacterized protein	TGME49_311220	Toxoplasma gondii (strain ATCC 50611 / Me49)	1632	SUBCELLULAR LOCATION: Membrane {ECO:0000256|ARBA:ARBA00004141}; Multi-pass membrane protein {ECO:0000256|ARBA:ARBA00004141}.
S8ES23	S8ES23_TOXGM	unreviewed	Uncharacterized protein	TGME49_310250	Toxoplasma gondii (strain ATCC 50611 / Me49)	653	SUBCELLULAR LOCATION: Membrane {ECO:0000256|ARBA:ARBA00004141}; Multi-pass membrane protein {ECO:0000256|ARBA:ARBA00004141}.
S8ESG7	S8ESG7_TOXGM	unreviewed	Transporter, solute:sodium symporter (SSS) family protein	TGME49_308990	Toxoplasma gondii (strain ATCC 50611 / Me49)	617	SUBCELLULAR LOCATION: Membrane {ECO:0000256|ARBA:ARBA00004141}; Multi-pass membrane protein {ECO:0000256|ARBA:ARBA00004141}.
S8ESH7	S8ESH7_TOXGM	unreviewed	SAG-related sequence SRS51	SRS51 TGME49_308840	Toxoplasma gondii (strain ATCC 50611 / Me49)	472	membrane
S8EST3	S8EST3_TOXGM	unreviewed	N-acetylgalactosaminyl transferase (EC 2.4.1.41)	TGME49_278518	Toxoplasma gondii (strain ATCC 50611 / Me49)	865	SUBCELLULAR LOCATION: Membrane {ECO:0000256|ARBA:ARBA00004606}; Single-pass type II membrane protein {ECO:0000256|ARBA:ARBA00004606}.
S8ESW8	S8ESW8_TOXGM	unreviewed	GPI-anchored wall transfer protein GWT1, putative	TGME49_214920	Toxoplasma gondii (strain ATCC 50611 / Me49)	858	SUBCELLULAR LOCATION: Membrane {ECO:0000256|ARBA:ARBA00004141}; Multi-pass membrane protein {ECO:0000256|ARBA:ARBA00004141}.
S8ETQ7	S8ETQ7_TOXGM	unreviewed	Uncharacterized protein	TGME49_315440	Toxoplasma gondii (strain ATCC 50611 / Me49)	981	SUBCELLULAR LOCATION: Membrane {ECO:0000256|ARBA:ARBA00004141}; Multi-pass membrane protein {ECO:0000256|ARBA:ARBA00004141}.
S8ETZ0	S8ETZ0_TOXGM	unreviewed	V-type proton ATPase proteolipid subunit	TGME49_212310	Toxoplasma gondii (strain ATCC 50611 / Me49)	157	SUBCELLULAR LOCATION: Membrane {ECO:0000256|ARBA:ARBA00004141}; Multi-pass membrane protein {ECO:0000256|ARBA:ARBA00004141}. Vacuole membrane {ECO:0000256|RuleBase:RU363060}; Multi-pass membrane protein {ECO:0000256|RuleBase:RU363060}.
S8ETZ9	S8ETZ9_TOXGM	unreviewed	Sodium:neurotransmitter symporter family protein	TGME49_314340	Toxoplasma gondii (strain ATCC 50611 / Me49)	1577	SUBCELLULAR LOCATION: Membrane {ECO:0000256|ARBA:ARBA00004141}; Multi-pass membrane protein {ECO:0000256|ARBA:ARBA00004141}.
S8EU26	S8EU26_TOXGM	unreviewed	Transmembrane protein	TGME49_313930	Toxoplasma gondii (strain ATCC 50611 / Me49)	881	SUBCELLULAR LOCATION: Membrane {ECO:0000256|ARBA:ARBA00004141}; Multi-pass membrane protein {ECO:0000256|ARBA:ARBA00004141}.
S8EU52	S8EU52_TOXGM	unreviewed	Cytochrome c oxidase subunit 3	TGME49_323400	Toxoplasma gondii (strain ATCC 50611 / Me49)	244	SUBCELLULAR LOCATION: Membrane {ECO:0000256|ARBA:ARBA00004141}; Multi-pass membrane protein {ECO:0000256|ARBA:ARBA00004141}.
S8EU72	S8EU72_TOXGM	unreviewed	COX3 domain-containing protein	TGME49_322600	Toxoplasma gondii (strain ATCC 50611 / Me49)	137	SUBCELLULAR LOCATION: Membrane {ECO:0000256|ARBA:ARBA00004141}; Multi-pass membrane protein {ECO:0000256|ARBA:ARBA00004141}.
S8EUE6	S8EUE6_TOXGM	unreviewed	DUF803 domain-containing protein	TGME49_312622	Toxoplasma gondii (strain ATCC 50611 / Me49)	814	SUBCELLULAR LOCATION: Membrane {ECO:0000256|ARBA:ARBA00004141}; Multi-pass membrane protein {ECO:0000256|ARBA:ARBA00004141}.
S8EUF8	S8EUF8_TOXGM	unreviewed	Metal cation transporter, ZIP family protein	TGME49_225530	Toxoplasma gondii (strain ATCC 50611 / Me49)	717	SUBCELLULAR LOCATION: Membrane {ECO:0000256|ARBA:ARBA00004141}; Multi-pass membrane protein {ECO:0000256|ARBA:ARBA00004141}.
S8EUG5	S8EUG5_TOXGM	unreviewed	Uncharacterized protein	TGME49_312430	Toxoplasma gondii (strain ATCC 50611 / Me49)	656	SUBCELLULAR LOCATION: Membrane {ECO:0000256|ARBA:ARBA00004141}; Multi-pass membrane protein {ECO:0000256|ARBA:ARBA00004141}.
S8EV13	S8EV13_TOXGM	unreviewed	Rhomboid protease ROM6 (EC 3.4.21.105)	ROM6 TGME49_245590	Toxoplasma gondii (strain ATCC 50611 / Me49)	588	SUBCELLULAR LOCATION: Membrane {ECO:0000256|ARBA:ARBA00004141}; Multi-pass membrane protein {ECO:0000256|ARBA:ARBA00004141}.
S8EV39	S8EV39_TOXGM	unreviewed	Uncharacterized protein	TGME49_246178	Toxoplasma gondii (strain ATCC 50611 / Me49)	380	SUBCELLULAR LOCATION: Membrane {ECO:0000256|ARBA:ARBA00004141}; Multi-pass membrane protein {ECO:0000256|ARBA:ARBA00004141}.
S8EV89	S8EV89_TOXGM	unreviewed	Uncharacterized protein	TGME49_228730	Toxoplasma gondii (strain ATCC 50611 / Me49)	1250	SUBCELLULAR LOCATION: Membrane {ECO:0000256|ARBA:ARBA00004141}; Multi-pass membrane protein {ECO:0000256|ARBA:ARBA00004141}.
S8EVK3	S8EVK3_TOXGM	unreviewed	Carrier superfamily protein	TGME49_248950	Toxoplasma gondii (strain ATCC 50611 / Me49)	592	SUBCELLULAR LOCATION: Membrane {ECO:0000256|ARBA:ARBA00004141}; Multi-pass membrane protein {ECO:0000256|ARBA:ARBA00004141}.
S8EVV0	S8EVV0_TOXGM	unreviewed	UDP-galactose transporter subfamily protein	TGME49_267380	Toxoplasma gondii (strain ATCC 50611 / Me49)	394	SUBCELLULAR LOCATION: Membrane {ECO:0000256|ARBA:ARBA00004141}; Multi-pass membrane protein {ECO:0000256|ARBA:ARBA00004141}.
S8EVX0	S8EVX0_TOXGM	unreviewed	Aquaporin 2	TGME49_267070	Toxoplasma gondii (strain ATCC 50611 / Me49)	426	SUBCELLULAR LOCATION: Membrane {ECO:0000256|ARBA:ARBA00004141}; Multi-pass membrane protein {ECO:0000256|ARBA:ARBA00004141}.
S8EW32	S8EW32_TOXGM	unreviewed	Slc30a2 protein	TGME49_251630	Toxoplasma gondii (strain ATCC 50611 / Me49)	920	SUBCELLULAR LOCATION: Membrane {ECO:0000256|ARBA:ARBA00004141}; Multi-pass membrane protein {ECO:0000256|ARBA:ARBA00004141}.
S8EW61	S8EW61_TOXGM	unreviewed	Sphingolipid 4-desaturase (EC 1.14.19.17)	TGME49_237200	Toxoplasma gondii (strain ATCC 50611 / Me49)	424	SUBCELLULAR LOCATION: Membrane {ECO:0000256|ARBA:ARBA00004141}; Multi-pass membrane protein {ECO:0000256|ARBA:ARBA00004141}.
S8EWK5	S8EWK5_TOXGM	unreviewed	SAG-related sequence SRS43	SRS43 TGME49_234930	Toxoplasma gondii (strain ATCC 50611 / Me49)	385	membrane
S8EWS9	S8EWS9_TOXGM	unreviewed	ATP-binding cassette G family transporter ABCG96 (EC 3.6.3.28)	ABCG96 TGME49_288920	Toxoplasma gondii (strain ATCC 50611 / Me49)	1045	SUBCELLULAR LOCATION: Membrane {ECO:0000256|ARBA:ARBA00004141}; Multi-pass membrane protein {ECO:0000256|ARBA:ARBA00004141}.
S8EX21	S8EX21_TOXGM	unreviewed	Uncharacterized protein	TGME49_223810	Toxoplasma gondii (strain ATCC 50611 / Me49)	1277	SUBCELLULAR LOCATION: Membrane {ECO:0000256|ARBA:ARBA00004141}; Multi-pass membrane protein {ECO:0000256|ARBA:ARBA00004141}.
S8EX48	S8EX48_TOXGM	unreviewed	Phospholipid-transporting ATPase (EC 7.6.2.1)	TGME49_224190	Toxoplasma gondii (strain ATCC 50611 / Me49)	1256	SUBCELLULAR LOCATION: Membrane {ECO:0000256|ARBA:ARBA00004141, ECO:0000256|RuleBase:RU362033}; Multi-pass membrane protein {ECO:0000256|ARBA:ARBA00004141, ECO:0000256|RuleBase:RU362033}.
S8EXA2	S8EXA2_TOXGM	unreviewed	ATP-binding cassette G family transporter ABCG77 (EC 3.6.3.25)	ABCG77 TGME49_315560	Toxoplasma gondii (strain ATCC 50611 / Me49)	1163	SUBCELLULAR LOCATION: Membrane {ECO:0000256|ARBA:ARBA00004141}; Multi-pass membrane protein {ECO:0000256|ARBA:ARBA00004141}.
S8EXD2	S8EXD2_TOXGM	unreviewed	Formate/nitrite transporter protein	TGME49_292110	Toxoplasma gondii (strain ATCC 50611 / Me49)	463	SUBCELLULAR LOCATION: Membrane {ECO:0000256|ARBA:ARBA00004141}; Multi-pass membrane protein {ECO:0000256|ARBA:ARBA00004141}.
S8EYA7	S8EYA7_TOXGM	unreviewed	Uncharacterized protein	TGME49_270270	Toxoplasma gondii (strain ATCC 50611 / Me49)	377	SUBCELLULAR LOCATION: Membrane {ECO:0000256|ARBA:ARBA00004141}; Multi-pass membrane protein {ECO:0000256|ARBA:ARBA00004141}.
S8EZI3	S8EZI3_TOXGM	unreviewed	GOLD domain-containing protein	TGME49_237250	Toxoplasma gondii (strain ATCC 50611 / Me49)	259	SUBCELLULAR LOCATION: Membrane {ECO:0000256|RuleBase:RU003827}; Single-pass type I membrane protein {ECO:0000256|RuleBase:RU003827}.
S8EZT2	S8EZT2_TOXGM	unreviewed	Carrier superfamily protein	TGME49_235650	Toxoplasma gondii (strain ATCC 50611 / Me49)	555	SUBCELLULAR LOCATION: Membrane {ECO:0000256|ARBA:ARBA00004141}; Multi-pass membrane protein {ECO:0000256|ARBA:ARBA00004141}.
S8F0B0	S8F0B0_TOXGM	unreviewed	Palmitoyltransferase (EC 2.3.1.225)	TGME49_229160	Toxoplasma gondii (strain ATCC 50611 / Me49)	693	SUBCELLULAR LOCATION: Membrane {ECO:0000256|ARBA:ARBA00004141}; Multi-pass membrane protein {ECO:0000256|ARBA:ARBA00004141}.
S8F0M6	S8F0M6_TOXGM	unreviewed	Uncharacterized protein	TGME49_257000	Toxoplasma gondii (strain ATCC 50611 / Me49)	876	SUBCELLULAR LOCATION: Membrane {ECO:0000256|ARBA:ARBA00004141}; Multi-pass membrane protein {ECO:0000256|ARBA:ARBA00004141}.
S8F0Q9	S8F0Q9_TOXGM	unreviewed	Uncharacterized protein	TGME49_225500	Toxoplasma gondii (strain ATCC 50611 / Me49)	430	SUBCELLULAR LOCATION: Membrane {ECO:0000256|ARBA:ARBA00004141}; Multi-pass membrane protein {ECO:0000256|ARBA:ARBA00004141}.
S8F0Z6	S8F0Z6_TOXGM	unreviewed	Uncharacterized protein	TGME49_226710	Toxoplasma gondii (strain ATCC 50611 / Me49)	297	SUBCELLULAR LOCATION: Cell membrane {ECO:0000256|ARBA:ARBA00004651}; Multi-pass membrane protein {ECO:0000256|ARBA:ARBA00004651}. Membrane {ECO:0000256|ARBA:ARBA00004141}; Multi-pass membrane protein {ECO:0000256|ARBA:ARBA00004141}.
S8F1C1	S8F1C1_TOXGM	unreviewed	Folate/biopterin transporter subfamily protein	TGME49_260220	Toxoplasma gondii (strain ATCC 50611 / Me49)	1056	SUBCELLULAR LOCATION: Membrane {ECO:0000256|ARBA:ARBA00004141}; Multi-pass membrane protein {ECO:0000256|ARBA:ARBA00004141}.
S8F2A3	S8F2A3_TOXGM	unreviewed	GpcrRhopsn4 domain-containing protein	TGME49_233760	Toxoplasma gondii (strain ATCC 50611 / Me49)	489	SUBCELLULAR LOCATION: Membrane {ECO:0000256|ARBA:ARBA00004141}; Multi-pass membrane protein {ECO:0000256|ARBA:ARBA00004141}.
S8F2G9	S8F2G9_TOXGM	unreviewed	Chloride channel protein	TGME49_265500	Toxoplasma gondii (strain ATCC 50611 / Me49)	2098	SUBCELLULAR LOCATION: Membrane {ECO:0000256|ARBA:ARBA00004141, ECO:0000256|RuleBase:RU361221}; Multi-pass membrane protein {ECO:0000256|ARBA:ARBA00004141, ECO:0000256|RuleBase:RU361221}.
S8F309	S8F309_TOXGM	unreviewed	Nucleoside transporter protein	TGME49_288540	Toxoplasma gondii (strain ATCC 50611 / Me49)	696	SUBCELLULAR LOCATION: Membrane {ECO:0000256|ARBA:ARBA00004141}; Multi-pass membrane protein {ECO:0000256|ARBA:ARBA00004141}.
S8F3B1	S8F3B1_TOXGM	unreviewed	Pep3/Vps18/deep orange family protein	TGME49_289730	Toxoplasma gondii (strain ATCC 50611 / Me49)	1157	SUBCELLULAR LOCATION: Membrane {ECO:0000256|ARBA:ARBA00004287}; Peripheral membrane protein {ECO:0000256|ARBA:ARBA00004287}; Cytoplasmic side {ECO:0000256|ARBA:ARBA00004287}.
S8F3F6	S8F3F6_TOXGM	unreviewed	Chloride transporter, chloride channel (ClC) family protein	TGME49_290330	Toxoplasma gondii (strain ATCC 50611 / Me49)	1604	SUBCELLULAR LOCATION: Membrane {ECO:0000256|ARBA:ARBA00004141}; Multi-pass membrane protein {ECO:0000256|ARBA:ARBA00004141}.
S8F3U7	S8F3U7_TOXGM	unreviewed	DUF2012 domain-containing protein	TGME49_243390	Toxoplasma gondii (strain ATCC 50611 / Me49)	337	integral component of membrane
S8F4C4	S8F4C4_TOXGM	unreviewed	Autophagy protein apg9 protein	TGME49_260640	Toxoplasma gondii (strain ATCC 50611 / Me49)	1655	SUBCELLULAR LOCATION: Membrane {ECO:0000256|ARBA:ARBA00004141}; Multi-pass membrane protein {ECO:0000256|ARBA:ARBA00004141}. Preautophagosomal structure membrane {ECO:0000256|ARBA:ARBA00004511}; Multi-pass membrane protein {ECO:0000256|ARBA:ARBA00004511}.
S8F4W5	S8F4W5_TOXGM	unreviewed	Fatty acyl-CoA desaturase, putative (EC 1.14.19.1)	TGME49_238950	Toxoplasma gondii (strain ATCC 50611 / Me49)	1042	SUBCELLULAR LOCATION: Membrane {ECO:0000256|ARBA:ARBA00004141}; Multi-pass membrane protein {ECO:0000256|ARBA:ARBA00004141}.
S8F509	S8F509_TOXGM	unreviewed	3-oxo-5-alpha-steroid 4-dehydrogenase (EC 1.3.1.38)	TGME49_285240	Toxoplasma gondii (strain ATCC 50611 / Me49)	347	SUBCELLULAR LOCATION: Membrane {ECO:0000256|ARBA:ARBA00004141}; Multi-pass membrane protein {ECO:0000256|ARBA:ARBA00004141}.
S8F556	S8F556_TOXGM	unreviewed	Uncharacterized protein	TGME49_273200	Toxoplasma gondii (strain ATCC 50611 / Me49)	684	SUBCELLULAR LOCATION: Membrane {ECO:0000256|ARBA:ARBA00004141}; Multi-pass membrane protein {ECO:0000256|ARBA:ARBA00004141}.
S8F5W6	S8F5W6_TOXGM	unreviewed	DHHC zinc finger domain-containing protein	TGME49_213550	Toxoplasma gondii (strain ATCC 50611 / Me49)	1362	SUBCELLULAR LOCATION: Membrane {ECO:0000256|ARBA:ARBA00004141}; Multi-pass membrane protein {ECO:0000256|ARBA:ARBA00004141}.
S8F5Z7	S8F5Z7_TOXGM	unreviewed	Uncharacterized protein	TGME49_213840	Toxoplasma gondii (strain ATCC 50611 / Me49)	404	SUBCELLULAR LOCATION: Membrane {ECO:0000256|ARBA:ARBA00004141}; Multi-pass membrane protein {ECO:0000256|ARBA:ARBA00004141}.
S8F7C1	S8F7C1_TOXGM	unreviewed	Membrane protein FtsH1 (EC 3.6.4.3)	TGME49_259260	Toxoplasma gondii (strain ATCC 50611 / Me49)	1250	integral component of membrane
S8F7W7	S8F7W7_TOXGM	unreviewed	Ion channel protein	TGME49_238995	Toxoplasma gondii (strain ATCC 50611 / Me49)	2540	SUBCELLULAR LOCATION: Cell membrane {ECO:0000256|ARBA:ARBA00004651}; Multi-pass membrane protein {ECO:0000256|ARBA:ARBA00004651}. Membrane {ECO:0000256|ARBA:ARBA00004141}; Multi-pass membrane protein {ECO:0000256|ARBA:ARBA00004141}.
S8F7Y6	S8F7Y6_TOXGM	unreviewed	Copper transporter	TGME49_262710	Toxoplasma gondii (strain ATCC 50611 / Me49)	375	SUBCELLULAR LOCATION: Membrane {ECO:0000256|RuleBase:RU367022}; Multi-pass membrane protein {ECO:0000256|RuleBase:RU367022}.
S8F851	S8F851_TOXGM	unreviewed	DUF1084 domain-containing protein	TGME49_222310	Toxoplasma gondii (strain ATCC 50611 / Me49)	536	SUBCELLULAR LOCATION: Membrane {ECO:0000256|ARBA:ARBA00004141}; Multi-pass membrane protein {ECO:0000256|ARBA:ARBA00004141}.
S8F8J9	S8F8J9_TOXGM	unreviewed	Uncharacterized protein	TGME49_285800	Toxoplasma gondii (strain ATCC 50611 / Me49)	1658	SUBCELLULAR LOCATION: Membrane {ECO:0000256|ARBA:ARBA00004141}; Multi-pass membrane protein {ECO:0000256|ARBA:ARBA00004141}.
S8F8N8	S8F8N8_TOXGM	unreviewed	Syntaxin protein	TGME49_209820	Toxoplasma gondii (strain ATCC 50611 / Me49)	648	SUBCELLULAR LOCATION: Membrane {ECO:0000256|ARBA:ARBA00004211}; Single-pass type IV membrane protein {ECO:0000256|ARBA:ARBA00004211}.
S8F8V0	S8F8V0_TOXGM	unreviewed	Uncharacterized protein	TGME49_209530	Toxoplasma gondii (strain ATCC 50611 / Me49)	437	SUBCELLULAR LOCATION: Membrane {ECO:0000256|ARBA:ARBA00004141}; Multi-pass membrane protein {ECO:0000256|ARBA:ARBA00004141}.
S8F8V6	S8F8V6_TOXGM	unreviewed	Uncharacterized protein	TGME49_212990	Toxoplasma gondii (strain ATCC 50611 / Me49)	1064	SUBCELLULAR LOCATION: Membrane {ECO:0000256|ARBA:ARBA00004141}; Multi-pass membrane protein {ECO:0000256|ARBA:ARBA00004141}.
S8F910	S8F910_TOXGM	unreviewed	Uncharacterized protein	TGME49_213670	Toxoplasma gondii (strain ATCC 50611 / Me49)	790	SUBCELLULAR LOCATION: Mitochondrion inner membrane {ECO:0000256|ARBA:ARBA00004434}; Single-pass membrane protein {ECO:0000256|ARBA:ARBA00004434}.
S8FAQ9	S8FAQ9_TOXGM	unreviewed	Uncharacterized protein	TGME49_239752	Toxoplasma gondii (strain ATCC 50611 / Me49)	905	SUBCELLULAR LOCATION: Membrane {ECO:0000256|ARBA:ARBA00004606}; Single-pass type II membrane protein {ECO:0000256|ARBA:ARBA00004606}.
S8FAW6	S8FAW6_TOXGM	unreviewed	Uncharacterized protein	TGME49_220930	Toxoplasma gondii (strain ATCC 50611 / Me49)	687	SUBCELLULAR LOCATION: Cell membrane {ECO:0000256|RuleBase:RU368066}; Multi-pass membrane protein {ECO:0000256|RuleBase:RU368066}. Membrane {ECO:0000256|ARBA:ARBA00004141}; Multi-pass membrane protein {ECO:0000256|ARBA:ARBA00004141}.
S8FBJ7	S8FBJ7_TOXGM	unreviewed	Membrane protein, putative	TGME49_321340	Toxoplasma gondii (strain ATCC 50611 / Me49)	3811	SUBCELLULAR LOCATION: Membrane {ECO:0000256|ARBA:ARBA00004141}; Multi-pass membrane protein {ECO:0000256|ARBA:ARBA00004141}.
S8FBM4	S8FBM4_TOXGM	unreviewed	Uncharacterized protein	TGME49_285940	Toxoplasma gondii (strain ATCC 50611 / Me49)	1189	SUBCELLULAR LOCATION: Cell membrane {ECO:0000256|ARBA:ARBA00004251}; Single-pass type I membrane protein {ECO:0000256|ARBA:ARBA00004251}. Membrane {ECO:0000256|ARBA:ARBA00004479}; Single-pass type I membrane protein {ECO:0000256|ARBA:ARBA00004479}.
S8FBP8	S8FBP8_TOXGM	unreviewed	Notch (Dsl) domain-containing protein	TGME49_285690	Toxoplasma gondii (strain ATCC 50611 / Me49)	512	SUBCELLULAR LOCATION: Membrane {ECO:0000256|ARBA:ARBA00004479}; Single-pass type I membrane protein {ECO:0000256|ARBA:ARBA00004479}.
S8FC35	S8FC35_TOXGM	unreviewed	Carrier superfamily protein	TGME49_208560	Toxoplasma gondii (strain ATCC 50611 / Me49)	670	SUBCELLULAR LOCATION: Membrane {ECO:0000256|ARBA:ARBA00004141}; Multi-pass membrane protein {ECO:0000256|ARBA:ARBA00004141}.
S8FDI8	S8FDI8_TOXGM	unreviewed	Metal cation transporter, ZIP family protein	TGME49_254080	Toxoplasma gondii (strain ATCC 50611 / Me49)	490	SUBCELLULAR LOCATION: Membrane {ECO:0000256|ARBA:ARBA00004141}; Multi-pass membrane protein {ECO:0000256|ARBA:ARBA00004141}.
S8FDK9	S8FDK9_TOXGM	unreviewed	Elongation of fatty acids protein (EC 2.3.1.199) (Very-long-chain 3-oxoacyl-CoA synthase)	TGME49_253880	Toxoplasma gondii (strain ATCC 50611 / Me49)	727	SUBCELLULAR LOCATION: Membrane {ECO:0000256|ARBA:ARBA00004141}; Multi-pass membrane protein {ECO:0000256|ARBA:ARBA00004141}.
S8FDU5	S8FDU5_TOXGM	unreviewed	Uncharacterized protein	TGME49_252340	Toxoplasma gondii (strain ATCC 50611 / Me49)	1243	SUBCELLULAR LOCATION: Membrane {ECO:0000256|ARBA:ARBA00004141}; Multi-pass membrane protein {ECO:0000256|ARBA:ARBA00004141}.
S8FF24	S8FF24_TOXGM	unreviewed	Uncharacterized protein	TGME49_208410	Toxoplasma gondii (strain ATCC 50611 / Me49)	1004	SUBCELLULAR LOCATION: Membrane {ECO:0000256|ARBA:ARBA00004141}; Multi-pass membrane protein {ECO:0000256|ARBA:ARBA00004141}.
S8G0Z3	S8G0Z3_TOXGM	unreviewed	Uncharacterized protein	TGME49_251400	Toxoplasma gondii (strain ATCC 50611 / Me49)	668	SUBCELLULAR LOCATION: Membrane {ECO:0000256|ARBA:ARBA00004141}; Multi-pass membrane protein {ECO:0000256|ARBA:ARBA00004141}.
S8G1K9	S8G1K9_TOXGM	unreviewed	Syntaxin 6, n-terminal protein	TGME49_300240	Toxoplasma gondii (strain ATCC 50611 / Me49)	237	integral component of Golgi membrane
S8G298	S8G298_TOXGM	unreviewed	Apical membrane antigen 1 protein	TGME49_315730	Toxoplasma gondii (strain ATCC 50611 / Me49)	651	SUBCELLULAR LOCATION: Membrane {ECO:0000256|ARBA:ARBA00004479}; Single-pass type I membrane protein {ECO:0000256|ARBA:ARBA00004479}.
S8G4L8	S8G4L8_TOXGM	unreviewed	TLD protein	TGME49_237280	Toxoplasma gondii (strain ATCC 50611 / Me49)	2190	SUBCELLULAR LOCATION: Membrane {ECO:0000256|ARBA:ARBA00004170}; Peripheral membrane protein {ECO:0000256|ARBA:ARBA00004170}.
S8G4T1	S8G4T1_TOXGM	unreviewed	GAF domain-containing protein	TGME49_236510	Toxoplasma gondii (strain ATCC 50611 / Me49)	1022	SUBCELLULAR LOCATION: Membrane {ECO:0000256|ARBA:ARBA00004141}; Multi-pass membrane protein {ECO:0000256|ARBA:ARBA00004141}.
S8G6S9	S8G6S9_TOXGM	unreviewed	Uncharacterized protein	TGME49_305620	Toxoplasma gondii (strain ATCC 50611 / Me49)	1197	SUBCELLULAR LOCATION: Membrane {ECO:0000256|ARBA:ARBA00004141}; Multi-pass membrane protein {ECO:0000256|ARBA:ARBA00004141}.
S8G829	S8G829_TOXGM	unreviewed	Uncharacterized protein	TGME49_288820	Toxoplasma gondii (strain ATCC 50611 / Me49)	751	SUBCELLULAR LOCATION: Membrane {ECO:0000256|ARBA:ARBA00004141}; Multi-pass membrane protein {ECO:0000256|ARBA:ARBA00004141}.
S8G8M6	S8G8M6_TOXGM	unreviewed	Cation-transporting ATPase (EC 7.2.2.-)	TGME49_219260	Toxoplasma gondii (strain ATCC 50611 / Me49)	3391	SUBCELLULAR LOCATION: Membrane {ECO:0000256|RuleBase:RU362082}; Multi-pass membrane protein {ECO:0000256|RuleBase:RU362082}.
S8G9F3	S8G9F3_TOXGM	unreviewed	CrcB family protein	TGME49_269750	Toxoplasma gondii (strain ATCC 50611 / Me49)	695	SUBCELLULAR LOCATION: Membrane {ECO:0000256|ARBA:ARBA00004141}; Multi-pass membrane protein {ECO:0000256|ARBA:ARBA00004141}.
S8G9W2	S8G9W2_TOXGM	unreviewed	3-oxo-5-alpha-steroid 4-dehydrogenase (EC 1.3.99.5)	TGME49_272180	Toxoplasma gondii (strain ATCC 50611 / Me49)	534	SUBCELLULAR LOCATION: Membrane {ECO:0000256|ARBA:ARBA00004141}; Multi-pass membrane protein {ECO:0000256|ARBA:ARBA00004141}.
S8GAV3	S8GAV3_TOXGM	unreviewed	MtN3/saliva family protein	TGME49_300250	Toxoplasma gondii (strain ATCC 50611 / Me49)	668	SUBCELLULAR LOCATION: Membrane {ECO:0000256|ARBA:ARBA00004141}; Multi-pass membrane protein {ECO:0000256|ARBA:ARBA00004141}.
S8GB98	S8GB98_TOXGM	unreviewed	GpcrRhopsn4 domain-containing protein	TGME49_216890	Toxoplasma gondii (strain ATCC 50611 / Me49)	999	SUBCELLULAR LOCATION: Membrane {ECO:0000256|ARBA:ARBA00004141}; Multi-pass membrane protein {ECO:0000256|ARBA:ARBA00004141}.
S8GBB9	S8GBB9_TOXGM	unreviewed	Formate/nitrite transporter protein	TGME49_229170	Toxoplasma gondii (strain ATCC 50611 / Me49)	500	SUBCELLULAR LOCATION: Membrane {ECO:0000256|ARBA:ARBA00004141}; Multi-pass membrane protein {ECO:0000256|ARBA:ARBA00004141}.
S8GBV4	S8GBV4_TOXGM	unreviewed	Carrier superfamily protein	TGME49_314710	Toxoplasma gondii (strain ATCC 50611 / Me49)	441	SUBCELLULAR LOCATION: Membrane {ECO:0000256|ARBA:ARBA00004141}; Multi-pass membrane protein {ECO:0000256|ARBA:ARBA00004141}.
S8GCQ0	S8GCQ0_TOXGM	unreviewed	PKD_channel domain-containing protein	TGME49_310560	Toxoplasma gondii (strain ATCC 50611 / Me49)	1684	SUBCELLULAR LOCATION: Membrane {ECO:0000256|ARBA:ARBA00004141}; Multi-pass membrane protein {ECO:0000256|ARBA:ARBA00004141}.
S8GD98	S8GD98_TOXGM	unreviewed	Dolichyl-P-Glc:Glc(2)Man(9)GlcNAc(2)-PP-dolichol alpha-1,2-glucosyltransferase (EC 2.4.1.256)	TGME49_263690	Toxoplasma gondii (strain ATCC 50611 / Me49)	919	SUBCELLULAR LOCATION: Membrane {ECO:0000256|ARBA:ARBA00004141}; Multi-pass membrane protein {ECO:0000256|ARBA:ARBA00004141}.
S8GDT7	S8GDT7_TOXGM	unreviewed	Uncharacterized protein	TGME49_205300	Toxoplasma gondii (strain ATCC 50611 / Me49)	697	SUBCELLULAR LOCATION: Membrane {ECO:0000256|ARBA:ARBA00004141}; Multi-pass membrane protein {ECO:0000256|ARBA:ARBA00004141}.
S8GDU1	S8GDU1_TOXGM	unreviewed	Cleft lip and palate transmembrane protein 1 (Clptm1) protein	TGME49_205240	Toxoplasma gondii (strain ATCC 50611 / Me49)	794	SUBCELLULAR LOCATION: Membrane {ECO:0000256|ARBA:ARBA00004141}; Multi-pass membrane protein {ECO:0000256|ARBA:ARBA00004141}.
S8GDV7	S8GDV7_TOXGM	unreviewed	Minor histocompatibility antigen h13, putative	TGME49_237150	Toxoplasma gondii (strain ATCC 50611 / Me49)	417	SUBCELLULAR LOCATION: Membrane {ECO:0000256|ARBA:ARBA00004141}; Multi-pass membrane protein {ECO:0000256|ARBA:ARBA00004141}.
S8GEB6	S8GEB6_TOXGM	unreviewed	Carrier superfamily protein	TGME49_202880	Toxoplasma gondii (strain ATCC 50611 / Me49)	666	SUBCELLULAR LOCATION: Membrane {ECO:0000256|ARBA:ARBA00004141}; Multi-pass membrane protein {ECO:0000256|ARBA:ARBA00004141}.
S8GED0	S8GED0_TOXGM	unreviewed	Uncharacterized protein	TGME49_234540	Toxoplasma gondii (strain ATCC 50611 / Me49)	614	SUBCELLULAR LOCATION: Membrane {ECO:0000256|ARBA:ARBA00004141}; Multi-pass membrane protein {ECO:0000256|ARBA:ARBA00004141}.
S8GER6	S8GER6_TOXGM	unreviewed	Uncharacterized protein	TGME49_224160	Toxoplasma gondii (strain ATCC 50611 / Me49)	2064	SUBCELLULAR LOCATION: Membrane {ECO:0000256|ARBA:ARBA00004287}; Peripheral membrane protein {ECO:0000256|ARBA:ARBA00004287}; Cytoplasmic side {ECO:0000256|ARBA:ARBA00004287}.
S8GGQ1	S8GGQ1_TOXGM	unreviewed	G protein-coupled receptor 89 isoform 5, putative	TGME49_286490	Toxoplasma gondii (strain ATCC 50611 / Me49)	751	SUBCELLULAR LOCATION: Membrane {ECO:0000256|ARBA:ARBA00004141}; Multi-pass membrane protein {ECO:0000256|ARBA:ARBA00004141}.
S8GIX1	S8GIX1_TOXGM	unreviewed	GAF domain-containing protein	TGME49_270800	Toxoplasma gondii (strain ATCC 50611 / Me49)	783	SUBCELLULAR LOCATION: Membrane {ECO:0000256|ARBA:ARBA00004141}; Multi-pass membrane protein {ECO:0000256|ARBA:ARBA00004141}.
S8GK54	S8GK54_TOXGM	unreviewed	Uncharacterized protein	TGME49_232120	Toxoplasma gondii (strain ATCC 50611 / Me49)	2026	SUBCELLULAR LOCATION: Membrane {ECO:0000256|ARBA:ARBA00004141}; Multi-pass membrane protein {ECO:0000256|ARBA:ARBA00004141}.
S8GLQ2	S8GLQ2_TOXGM	unreviewed	Metal cation transporter, ZIP family protein	TGME49_260300	Toxoplasma gondii (strain ATCC 50611 / Me49)	1063	SUBCELLULAR LOCATION: Membrane {ECO:0000256|ARBA:ARBA00004141}; Multi-pass membrane protein {ECO:0000256|ARBA:ARBA00004141}.
S8GNI5	S8GNI5_TOXGM	unreviewed	Uncharacterized protein	TGME49_203350	Toxoplasma gondii (strain ATCC 50611 / Me49)	458	SUBCELLULAR LOCATION: Membrane {ECO:0000256|ARBA:ARBA00004141}; Multi-pass membrane protein {ECO:0000256|ARBA:ARBA00004141}.
S8GNJ1	S8GNJ1_TOXGM	unreviewed	Uncharacterized protein	TGME49_203300	Toxoplasma gondii (strain ATCC 50611 / Me49)	1401	integral component of membrane
S8GNM2	S8GNM2_TOXGM	unreviewed	N-methyl-D-aspartate receptor-associated protein	TGME49_203030	Toxoplasma gondii (strain ATCC 50611 / Me49)	342	SUBCELLULAR LOCATION: Membrane {ECO:0000256|ARBA:ARBA00004141}; Multi-pass membrane protein {ECO:0000256|ARBA:ARBA00004141}.
S8GPK0	S8GPK0_TOXGM	unreviewed	TLC domain-containing protein	TGME49_243760	Toxoplasma gondii (strain ATCC 50611 / Me49)	435	SUBCELLULAR LOCATION: Membrane {ECO:0000256|ARBA:ARBA00004141}; Multi-pass membrane protein {ECO:0000256|ARBA:ARBA00004141}.
S8GQU8	S8GQU8_TOXGM	unreviewed	Uncharacterized protein	TGME49_284530	Toxoplasma gondii (strain ATCC 50611 / Me49)	923	SUBCELLULAR LOCATION: Membrane {ECO:0000256|ARBA:ARBA00004141, ECO:0000256|RuleBase:RU003822}; Multi-pass membrane protein {ECO:0000256|ARBA:ARBA00004141, ECO:0000256|RuleBase:RU003822}.
S8GRC2	S8GRC2_TOXGM	unreviewed	Uncharacterized protein	TGME49_220340	Toxoplasma gondii (strain ATCC 50611 / Me49)	1734	SUBCELLULAR LOCATION: Membrane {ECO:0000256|ARBA:ARBA00004141}; Multi-pass membrane protein {ECO:0000256|ARBA:ARBA00004141}.
S8GRX6	S8GRX6_TOXGM	unreviewed	FG-GAP repeat-containing protein	TGME49_301450	Toxoplasma gondii (strain ATCC 50611 / Me49)	1678	integral component of membrane
S8GS54	S8GS54_TOXGM	unreviewed	Uncharacterized protein	TGME49_211640	Toxoplasma gondii (strain ATCC 50611 / Me49)	2883	SUBCELLULAR LOCATION: Cell membrane {ECO:0000256|ARBA:ARBA00004651}; Multi-pass membrane protein {ECO:0000256|ARBA:ARBA00004651}. Membrane {ECO:0000256|ARBA:ARBA00004141}; Multi-pass membrane protein {ECO:0000256|ARBA:ARBA00004141}.
S8GSS4	S8GSS4_TOXGM	unreviewed	VTC domain-containing protein	TGME49_299080	Toxoplasma gondii (strain ATCC 50611 / Me49)	1231	SUBCELLULAR LOCATION: Membrane {ECO:0000256|ARBA:ARBA00004141}; Multi-pass membrane protein {ECO:0000256|ARBA:ARBA00004141}.
S8GTD3	S8GTD3_TOXGM	unreviewed	PQ loop repeat-containing protein	TGME49_253420	Toxoplasma gondii (strain ATCC 50611 / Me49)	410	SUBCELLULAR LOCATION: Membrane {ECO:0000256|ARBA:ARBA00004141}; Multi-pass membrane protein {ECO:0000256|ARBA:ARBA00004141}.
S8GUI2	S8GUI2_TOXGM	unreviewed	Membrane protein, putative	TGME49_321580	Toxoplasma gondii (strain ATCC 50611 / Me49)	262	Membrane protein, putative
S8GUY2	S8GUY2_TOXGM	unreviewed	Manganese resistance 1 protein, putative	TGME49_207910	Toxoplasma gondii (strain ATCC 50611 / Me49)	501	SUBCELLULAR LOCATION: Membrane {ECO:0000256|ARBA:ARBA00004141}; Multi-pass membrane protein {ECO:0000256|ARBA:ARBA00004141}.
V4Z7H9	V4Z7H9_TOXGV	unreviewed	Calcium-activated potassium channel slowpoke (Ion channel protein)	BN1205_092530 TGVEG_238995	Toxoplasma gondii (strain ATCC 50861 / VEG)	2540	SUBCELLULAR LOCATION: Cell membrane {ECO:0000256|ARBA:ARBA00004651}; Multi-pass membrane protein {ECO:0000256|ARBA:ARBA00004651}. Membrane {ECO:0000256|ARBA:ARBA00004141}; Multi-pass membrane protein {ECO:0000256|ARBA:ARBA00004141}.
V4Z9U4	V4Z9U4_TOXGV	unreviewed	Streptococcal surface antigen repeat-containing protein (Surface antigen repeat-containing protein)	BN1205_035350 TGVEG_212880	Toxoplasma gondii (strain ATCC 50861 / VEG)	6661	Streptococcal surface antigen repeat-containing protein (Surface antigen repeat-containing protein)
V4ZJG5	V4ZJG5_TOXGV	unreviewed	SAG-related sequence protein SRS36C	TGVEG_440320	Toxoplasma gondii (strain ATCC 50861 / VEG)	363	membrane
V4ZJH8	V4ZJH8_TOXGV	unreviewed	SAG-related sequence protein SRS40D (SRS domain-containing protein)	BN1205_065640 TGVEG_440660	Toxoplasma gondii (strain ATCC 50861 / VEG)	391	membrane
