# Supplementary material for: Epitope vaccine design for Toxoplasma gondii based on a genome-wide database of membrane proteins
Source: Parasit Vectors. 2022 Oct 12;15:364. doi: 10.1186/s13071-022-05497-z (PMC9555269; doi:10.1186/s13071-022-05497-z)
Supplement: Supplementary file 8 — Additional file 8. Identified epitopes capable of binding to both HLA-I and mouse MHC-I molecules, and epitopes capable of binding to both HLA-II and mouse MHC-II molecules. [file 13071_2022_5497_MOESM8_ESM.xlsx]

## Sheet: mhc1
MHC1 allele	peptide	score
HLA-B*07:02	SPRPGGLVL	0.999128
HLA-B*35:01	YPYKNITAF	0.998867
HLA-B*07:02	APQTPRPSL	0.998297
HLA-B*35:01	MPIEQVLKF	0.998138
HLA-B*07:02	RPSPQSSSL	0.998081
HLA-B*35:01	FPWSLPHSF	0.998051
HLA-B*35:01	FPSSFPASF	0.997202
HLA-B*07:02	SPRLPSVQF	0.996917
HLA-B*07:02	RPKLTSPTL	0.996886
HLA-B*07:02	SPRDPGLPF	0.996774
HLA-B*07:02	RPASLPSSL	0.996713
HLA-B*35:01	HPFIHAHTF	0.996648
HLA-B*35:01	FPVSSFSSF	0.996553
HLA-B*07:02	RPRRLGEEL	0.996429
HLA-B*07:02	SPVPSPRSL	0.996056
HLA-B*35:01	TPSPSSLSF	0.995576
HLA-A*02:06	FVFEFIPQV	0.995487
HLA-B*35:01	FPSPQTWNF	0.995369
HLA-B*07:02	SPKDPTFTL	0.995307
HLA-B*07:02	SPAPPAPPL	0.995306
HLA-B*07:02	APKPLSATM	0.995041
HLA-B*35:01	LPSPSFSSF	0.994761
HLA-B*53:01	FPWSLPHSF	0.994606
HLA-B*07:02	SPSLPFPSL	0.994582
HLA-B*35:01	FPREQQVTF	0.994431
HLA-B*53:01	FPSPQTWNF	0.994174
HLA-B*07:02	SPSPFSSSL	0.99357
HLA-B*07:02	YPVSPPSSL	0.993165
HLA-B*07:02	SPQTARPEL	0.993137
HLA-B*53:01	MPIEQVLKF	0.992973
HLA-B*35:01	SPATVQPAF	0.992874
HLA-B*35:01	SPYSVTPQF	0.99267
HLA-B*07:02	APMSQNLSL	0.99261
HLA-A*02:01	FVFEFIPQV	0.992276
HLA-B*35:01	TPFAGVHIF	0.992005
HLA-B*35:01	LPITPAQAF	0.991998
HLA-B*07:02	SPSPHSHRL	0.991483
HLA-B*35:01	SPSSHLPAF	0.99061
HLA-B*07:02	SPLPSSSPL	0.990419
HLA-B*07:02	APVPATLTL	0.990353
HLA-B*35:01	SPSGVQTAF	0.990249
HLA-B*07:02	APLPSFPSL	0.990021
HLA-B*07:02	LPLSPPSSL	0.989975
HLA-B*35:01	YPWAFVHVF	0.98977
HLA-B*07:02	APRKLQFVL	0.989691
HLA-A*02:01	YLHENVTFL	0.989516
HLA-B*07:02	SPALPSPSF	0.989491
HLA-B*07:02	SPLPPARAF	0.989479
HLA-B*07:02	MPFGRFSSL	0.989292
HLA-B*35:01	NPNPPVLTM	0.989276
HLA-B*07:02	APSLPTHEM	0.989219
HLA-B*07:02	RPQPSPRTF	0.989081
HLA-B*07:02	SPSSSSLSL	0.989073
HLA-B*07:02	RPLSRPPAF	0.988999
HLA-B*07:02	HPQPSTYTL	0.988667
HLA-B*07:02	KPANVKLVL	0.987853
HLA-A*02:03	AMIGNITEV	0.987689
HLA-B*35:01	HPIAWLPTF	0.987481
HLA-B*35:01	LPFAGMHIF	0.987263
HLA-B*35:01	TPFAGLHIF	0.98702
HLA-B*07:02	SPKPIFLKL	0.987016
HLA-B*35:01	SPALPSPSF	0.986981
HLA-B*07:02	SPSPMSAVL	0.985715
HLA-B*07:02	SPSFSPLSL	0.985592
HLA-B*07:02	VPSPSWQAL	0.985372
HLA-B*07:02	KPSQLRLLL	0.985318
HLA-B*07:02	TPAKVYRSL	0.985191
HLA-B*35:01	VPLPWPLTF	0.984817
HLA-B*35:01	LPILSPASF	0.984053
HLA-B*35:01	SPSAGPVEF	0.984026
HLA-B*07:02	APAAPAPSF	0.983919
HLA-B*35:01	FPLSVPTSL	0.983627
HLA-B*07:02	SPHLRLTAF	0.983308
HLA-A*02:01	AMIGNITEV	0.982638
HLA-B*35:01	MPHSPLERF	0.982126
HLA-B*08:01	SLYRRVQTL	0.982078
HLA-B*07:02	IPQPVRALL	0.982057
HLA-B*35:01	SPASFLSAF	0.982046
HLA-B*35:01	YPVSPPSSL	0.981809
HLA-B*07:02	RPARSLFSL	0.981634
HLA-B*07:02	SPSEAVTTL	0.98128
HLA-A*02:03	YLHENVTFL	0.98126
HLA-B*07:02	FPREQQVTF	0.981236
HLA-B*07:02	LPYPVYSSL	0.981118
HLA-B*35:01	LPLNLTLSF	0.980955
HLA-B*07:02	SPSSHLPAF	0.980747
HLA-B*53:01	YPYKNITAF	0.980636
HLA-B*35:01	VPLEASVTM	0.980375
HLA-B*07:02	SPYTHPPGL	0.980237
HLA-B*07:02	MPSTLRLPL	0.980191
HLA-B*35:01	APAGLSVEF	0.980123
HLA-B*07:02	SPSPVEASL	0.97993
HLA-B*07:02	VPSSSSPSL	0.979831
HLA-B*53:01	HPFIHAHTF	0.979205
HLA-B*53:01	FPSSFPASF	0.979121
HLA-B*07:02	RPSSPVPLL	0.978985
HLA-B*35:01	FPFSSSASL	0.978965
HLA-B*07:02	SPSFPVSSF	0.978081
HLA-B*51:01	LPYPVYSSL	0.977965
HLA-B*07:02	SPAVSHSAF	0.977778
HLA-B*35:01	SPAVSHSAF	0.977612
HLA-B*07:02	VPTEVKVAL	0.977118
HLA-B*07:02	LPIGIKTAL	0.976849
HLA-B*35:01	SPFTSSRAF	0.976795
HLA-B*07:02	VPLSSPAAL	0.976658
HLA-B*53:01	VPLPWPLTF	0.976654
HLA-B*07:02	KPFHSWVSL	0.976482
HLA-B*35:01	HPLFFNPAF	0.976429
HLA-B*35:01	LPLPASLNF	0.976359
HLA-B*07:02	RPLGTSASF	0.976192
HLA-B*35:01	LPFDPQFAL	0.97614
HLA-B*07:02	KPNVLRLIL	0.976132
HLA-B*07:02	VPTDIRYAL	0.975702
HLA-B*35:01	YPHNYFLLF	0.975637
HLA-B*07:02	QPRTLHLRL	0.975393
HLA-B*07:02	APLAPIAVL	0.975253
HLA-B*35:01	HPQPSTYTL	0.974971
HLA-B*35:01	SPLPPARAF	0.974931
HLA-B*07:02	RPYKPLQKF	0.97427
HLA-A*02:06	GQFDYFVSL	0.974187
HLA-B*35:01	FPVRVPLSL	0.974131
HLA-B*35:01	MPYNFIGSF	0.974098
HLA-B*07:02	LPSSLPSSL	0.974068
HLA-B*53:01	LPWPLTFHF	0.973999
HLA-B*07:02	SPSLFLSSL	0.973964
HLA-B*51:01	LPFSYVHLL	0.973704
HLA-B*51:01	FPFSFSPLL	0.973534
HLA-B*07:02	TPSSAVVSL	0.972316
HLA-B*35:01	LPWPLTFHF	0.972294
HLA-B*07:02	SPDAPSLTL	0.972185
HLA-B*53:01	TPSPSSLSF	0.972033
HLA-A*02:06	TVFEKFNKV	0.971695
HLA-B*35:01	SPSFPVSSF	0.971504
HLA-A*02:06	LIFPFLHYV	0.971384
HLA-B*07:02	RPLLSLLAL	0.971263
HLA-A*68:02	TVFEKFNKV	0.970745
HLA-B*07:02	QPYSGVVTL	0.970735
HLA-B*07:02	IPFFPLTAL	0.970601
HLA-B*07:02	LPSSLSSSL	0.970461
HLA-B*35:01	VPISKVMVF	0.970155
HLA-B*51:01	FPYVQLVQL	0.969969
HLA-B*35:01	APAAPAPSF	0.969939
HLA-B*35:01	HPWPFNLVL	0.969833
HLA-B*07:02	MPAAIPSPL	0.969733
HLA-B*08:01	SPHLRLTAF	0.969658
HLA-B*35:01	WPLPVSEHF	0.969574
HLA-B*07:02	RPLLLAQSL	0.969299
HLA-B*35:01	VPMGMSYAM	0.96926
HLA-B*07:02	SPSKLLSIL	0.968856
HLA-B*35:01	YPYLLVTEL	0.968503
HLA-B*07:02	NPNPPVLTM	0.968184
HLA-B*53:01	MPHSPLERF	0.967507
HLA-B*07:02	SPLVSSLSL	0.967334
HLA-B*35:01	LPKQVLEEF	0.966784
HLA-B*07:02	FPQSLRYAL	0.966742
HLA-A*02:03	FVFEFIPQV	0.966668
HLA-B*07:02	APKALVDSL	0.966461
HLA-B*07:02	APAELSLEL	0.966446
HLA-B*35:01	LPWPGAHPL	0.9664
HLA-B*35:01	MPQPEVPPL	0.966295
HLA-B*53:01	LPSPSFSSF	0.966239
HLA-B*07:02	SPSGVQTAF	0.96619
HLA-B*51:01	IPSPLRMTV	0.966075
HLA-B*07:02	SPTPSPLGL	0.966012
HLA-B*07:02	KPVATLLSL	0.965851
HLA-B*07:02	SPYHLYASL	0.964801
HLA-B*53:01	YPWAFVHVF	0.964776
HLA-A*68:02	FVFEFIPQV	0.963932
HLA-B*35:01	LPPPPPAAF	0.963112
HLA-B*35:01	SPSEVPGSF	0.962974
HLA-B*53:01	MPLPLPLLL	0.962858
HLA-B*07:02	APNPKLVIF	0.962607
HLA-B*07:02	SPFIRGIGL	0.962554
HLA-B*07:02	FPLSVPTSL	0.962475
HLA-B*07:02	APRSMPIRF	0.962012
HLA-B*07:02	SPFTSSRAF	0.96184
HLA-B*07:02	IPSPLRMTV	0.961649
HLA-B*07:02	SPLLSIVSL	0.961056
HLA-B*07:02	MPMSFQNSL	0.960974
HLA-B*53:01	LPLPASLNF	0.960681
HLA-B*53:01	SPYSVTPQF	0.960487
HLA-B*07:02	TPYLIRQML	0.960343
HLA-B*07:02	IPSQSPQQL	0.959928
HLA-A*02:06	AMIGNITEV	0.959896
HLA-B*35:01	MPQTEFLLF	0.959289
HLA-A*02:06	YLHENVTFL	0.958859
HLA-B*08:01	MPFGRFSSL	0.958772
HLA-B*35:01	APHSILEAF	0.958468
HLA-B*53:01	TPFAGVHIF	0.95815
HLA-B*51:01	MPLPLPLLL	0.958148
HLA-B*07:02	SPATVQPAF	0.958112
HLA-A*02:01	LIFPFLHYV	0.958046
HLA-B*07:02	APRLLPLHF	0.95783
HLA-B*08:01	LVYQRTVTL	0.957782
HLA-B*35:01	IPANVTFFF	0.957583
HLA-B*07:02	LPVSLPSSL	0.957483
HLA-B*07:02	GPQDLPHSL	0.957361
HLA-B*35:01	YPYVLNPSL	0.957156
HLA-B*53:01	HPIAWLPTF	0.95702
HLA-B*53:01	WPLPVSEHF	0.956702
HLA-B*53:01	FPREQQVTF	0.955972
HLA-B*35:01	MPMSFQNSL	0.955574
HLA-B*35:01	SPLTAFPAF	0.955486
HLA-B*35:01	LPASLPEAL	0.955415
HLA-B*53:01	FPVSSFSSF	0.955272
HLA-B*35:01	FPLSASASL	0.954652
HLA-B*35:01	LPFAIVLVF	0.954495
HLA-B*53:01	IPANVTFFF	0.954172
HLA-B*07:02	KPSQNSFTL	0.95371
HLA-B*35:01	SPATVSSLF	0.953634
HLA-B*07:02	TPSPSSLSF	0.953532
HLA-B*53:01	YPHNYFLLF	0.953451
HLA-B*53:01	MPQTEFLLF	0.953155
HLA-B*07:02	KPYIFHSPL	0.953149
HLA-B*35:01	LPMVLMQQF	0.953083
HLA-B*07:02	APLKLRPVF	0.952687
HLA-B*07:02	SPLQLPYAL	0.952276
HLA-B*35:01	QPTFPPLTF	0.952157
HLA-B*07:02	KPSPYTLFL	0.951465
HLA-B*07:02	YPYKNITAF	0.951399
HLA-B*35:01	APFAGMHIF	0.951174
HLA-B*35:01	APLANTLAF	0.951075
HLA-B*35:01	LPFHPVFPF	0.95069
HLA-B*51:01	LPYSITSYL	0.94948
HLA-B*07:02	RPSAPASLF	0.949356
HLA-B*07:02	SPYSVTPQF	0.949243
HLA-B*53:01	LPFAGMHIF	0.948955
HLA-B*07:02	IPQVKSTSF	0.948919
HLA-B*07:02	APSSVRFFL	0.948051
HLA-B*07:02	FPFSSSASL	0.94753
HLA-B*53:01	HPQPVPFLL	0.947479
HLA-B*35:01	MPFGRFSSL	0.947448
HLA-B*07:02	SPSRAGVPF	0.947437
HLA-B*07:02	SPLHSSTHL	0.947434
HLA-B*35:01	SPRDPGLPF	0.946978
HLA-B*51:01	YPYVLNPSL	0.94689
HLA-B*07:02	SPSQNSFTL	0.94656
HLA-B*07:02	HPRLLFAEF	0.946196
HLA-B*07:02	LPWPGAHPL	0.945607
HLA-B*35:01	SPSQGFVRF	0.945331
HLA-B*07:02	VPLAAATAL	0.945016
HLA-B*07:02	SPGAVRLPF	0.944982
HLA-B*35:01	APSLPTHEM	0.944859
HLA-B*07:02	LPSPSFSSF	0.944594
HLA-B*07:02	RPVDARLLF	0.944272
HLA-B*07:02	NPYTIGHVL	0.943481
HLA-B*35:01	MPLPLPLLL	0.94317
HLA-B*07:02	FPVRVPLSL	0.943142
HLA-B*07:02	SPASFLSAF	0.943098
HLA-B*07:02	LPHVFPAAL	0.942954
HLA-B*07:02	IPHRPYHVF	0.942451
HLA-B*07:02	VPNSHVQLL	0.942071
HLA-B*51:01	YPYLLVTEL	0.941795
HLA-B*35:01	LPIGIKTAL	0.940975
HLA-B*51:01	FPLSVPTSL	0.940836
HLA-B*53:01	FPLSVPTSL	0.939967
HLA-B*07:02	RPGVLRLLL	0.939283
HLA-B*07:02	QPRKMQLQF	0.938806
HLA-B*07:02	YPHWLQTKL	0.938259
HLA-A*02:03	SLYRRVQTL	0.937696
HLA-B*07:02	SPSVLHIRL	0.937614
HLA-B*35:01	LPVSLPSSL	0.937183
HLA-B*07:02	KPLEEIVAL	0.937054
HLA-B*07:02	VPSVMTLAL	0.936439
HLA-B*53:01	LPITPAQAF	0.936402
HLA-B*51:01	LPFKIFPLL	0.936206
HLA-B*35:01	APSSIVTPF	0.935734
HLA-A*02:06	RVVEYTHHL	0.935473
HLA-B*07:02	SPSEVPGSF	0.935257
HLA-B*07:02	HPLLPFFSL	0.934661
HLA-B*35:01	MPAAIPSPL	0.934528
HLA-B*07:02	SPLSLATPL	0.934072
HLA-B*35:01	IPNFKLHSF	0.934007
HLA-B*07:02	IPQKNISTM	0.933577
HLA-B*53:01	TPFAGLHIF	0.933157
HLA-B*35:01	SPSEAVTTL	0.933072
HLA-B*35:01	QPYSGVVTL	0.932377
HLA-B*07:02	SPSAGPVEF	0.932127
HLA-B*53:01	LPLNLTLSF	0.931141
HLA-B*35:01	IPSDAVLQL	0.931064
HLA-B*07:02	LPAIFSSSL	0.930581
HLA-B*35:01	FPQSLRYAL	0.929658
HLA-A*68:02	STATFTHAL	0.92963
HLA-B*35:01	SPAPPAPPL	0.929509
HLA-B*07:02	MPQPEVPPL	0.929351
HLA-B*07:02	RPSPTPLDF	0.929134
HLA-B*07:02	TPARMYSEL	0.928693
HLA-B*35:01	GPHPFQLSF	0.928425
HLA-B*51:01	VPLPWPLTF	0.927985
HLA-B*07:02	NPMSSVVQL	0.927827
HLA-B*51:01	VPFIFSHQL	0.927425
HLA-B*53:01	QPTFPPLTF	0.927299
HLA-A*02:03	TVFEKFNKV	0.92655
HLA-B*35:01	SPQSLTNIF	0.926495
HLA-B*07:02	SPVAVLNEL	0.926175
HLA-B*07:02	APAGLSVEF	0.925991
HLA-B*35:01	VPQEFRQVF	0.925732
HLA-B*35:01	LPSSLPSSL	0.924971
HLA-B*35:01	VPWSVLVSF	0.924829
HLA-B*07:02	TPTLLIHAL	0.924627
HLA-B*07:02	VPNELLQPL	0.924061
HLA-B*35:01	FPFSFSPLL	0.923904
HLA-B*35:01	FPRYLLLSF	0.923599
HLA-B*35:01	YPFWFKSLF	0.923553
HLA-B*35:01	NPYTIGHVL	0.923485
HLA-A*02:03	LIFPFLHYV	0.923368
HLA-B*53:01	APASIVLLF	0.923357
HLA-B*53:01	LPILSPASF	0.923341
HLA-B*53:01	IPTLLSTLF	0.923114
HLA-B*35:01	TPFLYRNTF	0.922909
HLA-B*53:01	NPNPPVLTM	0.922541
HLA-B*07:02	APSSIVTPF	0.922041
HLA-B*07:02	IPNFKLHSF	0.921878
HLA-B*35:01	LPYPVYSSL	0.921869
HLA-B*07:02	SPFALAPTL	0.921567
HLA-B*35:01	IPQKNISTM	0.920937
HLA-B*35:01	SPHLRLTAF	0.920739
HLA-B*35:01	TAYDPHAYF	0.920606
HLA-B*07:02	APLANTLAF	0.920507
HLA-B*07:02	FPLSASASL	0.92049
HLA-B*53:01	HPQPSTYTL	0.920396
HLA-B*35:01	IPTAFLVSM	0.920202
HLA-B*51:01	YPYKNITAF	0.920048
HLA-B*51:01	LPLPYSVRL	0.920008
HLA-B*35:01	IPTLLSTLF	0.919851
HLA-B*35:01	FPYVQLVQL	0.919838
HLA-B*35:01	HPQPVPFLL	0.91981
HLA-B*51:01	MPFGRFSSL	0.919764
HLA-B*07:02	GPHPFQLSF	0.919113
HLA-B*53:01	LPSRFPSLF	0.919109
HLA-B*53:01	LPMVLMQQF	0.918952
HLA-B*35:01	LPLALSSLF	0.91849
HLA-B*07:02	SPYLSLPRL	0.917605
HLA-B*07:02	VPSKMLIQL	0.917561
HLA-B*35:01	TPSSAVVSL	0.917519
HLA-B*53:01	VPISKVMVF	0.917066
HLA-A*02:06	YSFAHVHSL	0.916512
HLA-B*07:02	APHSILEAF	0.916473
HLA-B*51:01	FPVRVPLSL	0.916472
HLA-B*07:02	HPFIHAHTF	0.916164
HLA-B*35:01	IPHRPYHVF	0.91582
HLA-B*08:01	IPNFKLHSF	0.915775
HLA-B*53:01	FPVRVPLSL	0.915676
HLA-B*51:01	FPFSSSASL	0.914854
HLA-A*02:06	SSYEKFQQV	0.914822
HLA-B*35:01	SPSPFSSSL	0.914347
HLA-B*35:01	LPLSPPSSL	0.914256
HLA-B*51:01	LPFSLFVSL	0.91417
HLA-A*02:06	VVFDSTQYL	0.913981
HLA-B*07:02	LPPPPPAAF	0.913524
HLA-B*35:01	LPSSLSSSL	0.913452
HLA-B*51:01	FPWSLPHSF	0.913196
HLA-B*07:02	SPNTHPFDL	0.913064
HLA-B*07:02	VPHAAVQIL	0.912797
HLA-B*51:01	MPIEQVLKF	0.912118
HLA-B*35:01	VPTEVKVAL	0.911898
HLA-B*35:01	APASIVLLF	0.911593
HLA-B*35:01	QPYVPGPLF	0.91125
HLA-B*07:02	RPIILRDRL	0.910731
HLA-B*35:01	TPTENHFTL	0.910376
HLA-B*15:01	SQAPYFNTM	0.910339
HLA-B*35:01	APVPATLTL	0.909637
HLA-A*02:01	SLIQNIYTI	0.90913
HLA-B*07:02	LPHQINHRL	0.909072
HLA-B*35:01	VPWIDSHAL	0.909022
HLA-B*07:02	YPYVLNPSL	0.908806
HLA-A*02:06	LVMDHFQFL	0.907305
HLA-B*35:01	SPSPVEASL	0.907039
HLA-B*07:02	VPSSSGLLL	0.906856
HLA-B*07:02	HPQPVPFLL	0.906802
HLA-B*53:01	IPDKFMYLF	0.906394
HLA-B*57:01	VTFPLVVTL	0.905979
HLA-B*07:02	HPWPFNLVL	0.904944
HLA-B*07:02	SPLPLFDAL	0.904173
HLA-A*02:06	KVPPFFTSL	0.90414
HLA-B*07:02	SPLTVPVIL	0.90384
HLA-B*51:01	LPFLTALQL	0.903252
HLA-B*07:02	KPVPPFNLF	0.903016
HLA-B*35:01	VPTDIRYAL	0.902244
HLA-B*07:02	LPASLPEAL	0.902191
HLA-B*08:01	SALRRLATL	0.902086
HLA-B*53:01	LPLALSSLF	0.900206
HLA-B*07:02	SPIPLHQWL	0.900074
HLA-B*35:01	SPSRAGVPF	0.898551
HLA-B*07:02	VPQEFRQVF	0.896981
HLA-B*35:01	SPRLPSVQF	0.896739
HLA-B*35:01	TPTLLIHAL	0.896684
HLA-A*02:06	RALDNLHAV	0.896287
HLA-A*02:03	VLYPFLSLL	0.896
HLA-B*07:02	LPFDPQFAL	0.895967
HLA-B*07:02	TPLPLNAPL	0.895607
HLA-B*07:02	RPLWLIGTL	0.895406
HLA-B*35:01	SPSPMSAVL	0.895208
HLA-B*07:02	LPYSITSYL	0.894503
HLA-A*02:06	YSIEFLFSL	0.894077
HLA-B*35:01	SPLQLPYAL	0.89399
HLA-B*51:01	MPPSLPVTL	0.893832
HLA-B*35:01	IPQVKSTSF	0.893625
HLA-A*02:01	GQFDYFVSL	0.893377
HLA-A*68:02	SVFAQFNKV	0.892796
HLA-B*07:02	IPSDAVLQL	0.892787
HLA-B*07:02	VPLALSGSL	0.892554
HLA-B*53:01	SPATVQPAF	0.892513
HLA-B*35:01	SPMNGGYYM	0.892042
HLA-A*02:06	AVVSFFSTV	0.89185
HLA-B*07:02	RPSPYAELL	0.891592
HLA-B*07:02	YPYLLVTEL	0.89145
HLA-B*35:01	KPVTATVQF	0.891416
HLA-B*35:01	VPSSSSPSL	0.89135
HLA-B*35:01	LPSRFPSLF	0.891151
HLA-B*53:01	LPKQVLEEF	0.890861
HLA-B*35:01	SPQQALEQF	0.889614
HLA-B*51:01	LPYWLQPLL	0.889255
HLA-B*53:01	QPYVPGPLF	0.888803
HLA-B*35:01	VPSPSWQAL	0.888652
HLA-B*07:02	VPLVGIVSL	0.888535
HLA-A*02:06	IVFEKELQL	0.888505
HLA-B*51:01	VPFMLGNAI	0.887817
HLA-B*07:02	LPSMVTLQL	0.887559
HLA-A*02:01	VMNEFISFL	0.887532
HLA-B*51:01	LPFDPQFAL	0.887398
HLA-B*35:01	NPMSSVVQL	0.88718
HLA-B*07:02	KPVTATVQF	0.887048
HLA-A*02:06	YAYPVVEFL	0.88686
HLA-B*35:01	SPILSHQFF	0.886255
HLA-B*08:01	LPLVKWVAL	0.886254
HLA-A*02:03	VMNEFISFL	0.886068
HLA-A*02:01	VLYPFLSLL	0.885837
HLA-B*07:02	APPPVPPPF	0.88576
HLA-B*51:01	HPWPFNLVL	0.884713
HLA-B*35:01	RPLGTSASF	0.88441
HLA-B*08:01	IPQVKSTSF	0.884289
HLA-B*07:02	MPPSLPVTL	0.883923
HLA-B*53:01	SPATVSSLF	0.883874
HLA-B*53:01	YPFWFKSLF	0.883671
HLA-B*07:02	TPGNHFFSL	0.883482
HLA-B*53:01	SPALPSPSF	0.882505
HLA-B*51:01	LPLSPPSSL	0.882072
HLA-A*02:06	SVFAQFNKV	0.882036
HLA-B*07:02	IPIILQTAL	0.881889
HLA-B*53:01	LPPPPPAAF	0.881334
HLA-B*35:01	MPPSLPVTL	0.8812
HLA-A*23:01	MFFPFIYHL	0.881199
HLA-B*53:01	SPSAGPVEF	0.881093
HLA-B*35:01	APAELSLEL	0.880609
HLA-B*51:01	HPFIHAHTF	0.879905
HLA-B*07:02	RPLSAVSGF	0.879824
HLA-B*51:01	IPSDAVLQL	0.879758
HLA-B*35:01	LPSMVTLQL	0.879492
HLA-B*07:02	LPHTLLAVL	0.879295
HLA-B*08:01	MPYMKFKHF	0.878772
HLA-B*53:01	IPSDAVLQL	0.877666
HLA-B*35:01	SPVVISFPF	0.876622
HLA-B*53:01	VPWSVLVSF	0.876528
HLA-B*07:02	RPLSAVTGF	0.875713
HLA-B*08:01	SPKPIFLKL	0.874772
HLA-B*07:02	KPNLDGLTF	0.874356
HLA-B*07:02	SPLTAFPAF	0.874289
HLA-A*02:01	SLYRRVQTL	0.874252
HLA-A*32:01	VTFPLVVTL	0.873525
HLA-B*35:01	IPIILQTAL	0.873182
HLA-B*35:01	IPFFPLTAL	0.873097
HLA-B*53:01	YPVSPPSSL	0.87271
HLA-B*57:01	KAFKLHHSL	0.872427
HLA-B*07:02	MPLPLPLLL	0.871618
HLA-B*07:02	SPSQGFVRF	0.870725
HLA-B*35:01	LPIALNYLM	0.870649
HLA-B*51:01	QPYSGVVTL	0.870609
HLA-B*35:01	KPVPPFNLF	0.870349
HLA-B*07:02	APAILLPHL	0.870191
HLA-B*51:01	SPFALAPTL	0.869889
HLA-B*35:01	SPFALAPTL	0.868232
HLA-B*51:01	FPFLHYVFL	0.867542
HLA-B*07:02	VPLEASVTM	0.867259
HLA-B*07:02	LPITPAQAF	0.86718
HLA-B*07:02	FPRYLLLSF	0.867053
HLA-B*07:02	TPTENHFTL	0.866968
HLA-B*07:02	APVTLGVGL	0.866767
HLA-B*07:02	APATIVAPF	0.866467
HLA-B*35:01	YPHWLQTKL	0.86591
HLA-B*35:01	LPFSLFVSL	0.86494
HLA-B*07:02	SPMNGGYYM	0.864384
HLA-B*08:01	MSFSKTTSL	0.864151
HLA-B*35:01	APATIVAPF	0.864114
HLA-B*35:01	KPNLDGLTF	0.863645
HLA-B*35:01	APKPLSATM	0.863622
HLA-B*07:02	VPISKVMVF	0.863357
HLA-B*35:01	SPKDPTFTL	0.86285
HLA-B*35:01	YPAWMWLSM	0.862489
HLA-B*57:01	RSYHIFYQM	0.86224
HLA-B*07:02	VPLPWPLTF	0.861977
HLA-B*07:02	QPTFPPLTF	0.861674
HLA-B*35:01	APNPKLVIF	0.861513
HLA-B*51:01	YPVSPPSSL	0.861049
HLA-B*35:01	SPVPSPRSL	0.860518
HLA-B*35:01	HPRLLFAEF	0.860283
HLA-B*35:01	LPYSITSYL	0.860197
HLA-B*57:01	RTISFLPLL	0.859552
HLA-B*07:02	YPSLLSAPL	0.859309
HLA-B*07:02	RPLRLTWQL	0.858553
HLA-B*53:01	KPVPPFNLF	0.85796
HLA-B*07:02	FPWSLPHSF	0.857767
HLA-B*53:01	FPFSFSPLL	0.85775
HLA-B*08:01	SAFPRLQNL	0.857738
HLA-A*02:03	SMVDFSSSL	0.857444
HLA-B*35:01	VPAVSLTLF	0.857223
HLA-B*53:01	LPFAIVLVF	0.857093
HLA-A*02:06	RVPPFFTSL	0.857073
HLA-B*08:01	VAIPRHLYL	0.857072
HLA-B*53:01	VPAVSLTLF	0.855546
HLA-B*53:01	HPWPFNLVL	0.854615
HLA-B*51:01	YAYNFYPTL	0.854508
HLA-B*53:01	SPLPPARAF	0.854346
HLA-B*51:01	LPHQINHRL	0.852255
HLA-B*08:01	RPLSRPPAF	0.852004
HLA-B*35:01	SPSSSSLSL	0.851986
HLA-B*35:01	LPHVFPAAL	0.851449
HLA-B*53:01	YPYLLVTEL	0.851247
HLA-B*35:01	APFATFTLF	0.851212
HLA-B*07:02	FPVSSFSSF	0.850873
HLA-A*32:01	VVFTPFVSF	0.850805
HLA-A*32:01	KVLKKYLSL	0.850445
HLA-A*32:01	ATFPLFITI	0.850196
HLA-B*35:01	SPSQNSFTL	0.850028
HLA-B*07:02	LPLVKWVAL	0.849929
HLA-B*53:01	SPSGVQTAF	0.849226
HLA-B*51:01	SPYSVTPQF	0.84898
HLA-B*51:01	IPFFPLTAL	0.848884
HLA-B*51:01	LPSPSFSSF	0.848577
HLA-B*53:01	SPNVFVLLF	0.848529
HLA-B*07:02	KPPEIAPAF	0.848441
HLA-B*51:01	LPFFLPALL	0.848305
HLA-B*35:01	KPPEIAPAF	0.848302
HLA-B*07:02	VPWIDSHAL	0.848087
HLA-B*51:01	MPMSFQNSL	0.847849
HLA-B*35:01	APPPVPPPF	0.847573
HLA-B*35:01	SPDAPSLTL	0.847437
HLA-B*53:01	LPFSYVHLL	0.846705
HLA-B*53:01	IPNFKLHSF	0.84614
HLA-B*35:01	LPFSYVHLL	0.845271
HLA-B*07:02	FPSSFPASF	0.845188
HLA-A*02:01	IVFEKELQL	0.844936
HLA-B*51:01	HPQPVPFLL	0.844766
HLA-B*07:02	KPVTLQSLL	0.842712
HLA-B*07:02	SPATVSSLF	0.84211
HLA-B*08:01	FPREQQVTF	0.841964
HLA-B*07:02	VPMGMSYAM	0.841723
HLA-B*51:01	VPLTYLQTL	0.841579
HLA-B*51:01	SPYLSLPRL	0.841443
HLA-B*35:01	LPAIFSSSL	0.841347
HLA-B*07:02	TPFLYRNTF	0.841339
HLA-B*51:01	NPYTIGHVL	0.841001
HLA-B*51:01	NPNPPVLTM	0.840531
HLA-B*53:01	SPSEVPGSF	0.840119
HLA-B*08:01	TLFSRFGSL	0.839882
HLA-A*02:03	SSYEKFQQV	0.839744
HLA-B*53:01	SPSSHLPAF	0.83938
HLA-B*51:01	FPTLIFLSL	0.838735
HLA-B*51:01	IPATYITNL	0.838428
HLA-B*35:01	IPSQSPQQL	0.838211
HLA-B*51:01	LPLSLPLIL	0.837617
HLA-A*02:06	VTFPLVVTL	0.837354
HLA-A*68:02	TAFDVYMHL	0.836993
HLA-B*35:01	LPLLYRSEF	0.836579
HLA-B*08:01	KVLKKYLSL	0.835812
HLA-B*51:01	SPKPIFLKL	0.835758
HLA-B*51:01	HPYNIAYLL	0.835544
HLA-B*35:01	IPDKFMYLF	0.835391
HLA-B*35:01	GPHPNVPHF	0.834792
HLA-B*07:02	SPYLSLLLL	0.833849
HLA-B*51:01	YPWAFVHVF	0.833513
HLA-B*07:02	KPAFVLPPF	0.833512
HLA-B*35:01	TPYLMTTRM	0.833049
HLA-B*53:01	SPSQGFVRF	0.832889
HLA-B*35:01	SPVAVLNEL	0.832197
HLA-B*51:01	FPREQQVTF	0.831936
HLA-B*35:01	SPNVFVLLF	0.831736
HLA-B*51:01	TPLFLHATI	0.831486
HLA-B*35:01	LPLFAYVQF	0.831063
HLA-A*02:01	TVFEKFNKV	0.830991
HLA-B*35:01	RPLSRPPAF	0.830953
HLA-B*07:02	LPFSLFVSL	0.830847
HLA-B*51:01	LPWPGAHPL	0.830804
HLA-B*35:01	HPYNIAYLL	0.8308
HLA-A*02:06	ATFPLFITI	0.829769
HLA-B*53:01	QPPPPLFLF	0.829734
HLA-B*35:01	FPTLIFLSL	0.829682
HLA-B*35:01	LPMKWVAFF	0.828583
HLA-B*35:01	LPLTVEIEL	0.828466
HLA-B*07:02	LPLRSHALL	0.828052
HLA-A*02:06	SLIQNIYTI	0.827952
HLA-B*58:01	SSVSNPFSF	0.827603
HLA-B*51:01	VPNSHVQLL	0.827518
HLA-B*53:01	APAGLSVEF	0.82748
HLA-A*68:02	YAYPVVEFL	0.826951
HLA-B*51:01	LPSMVTLQL	0.826929
HLA-B*58:01	VTFPLVVTL	0.826821
HLA-B*07:02	LPILSPASF	0.826391
HLA-B*35:01	SPRPGGLVL	0.82618
HLA-B*07:02	WPQRLLLSL	0.825845
HLA-A*68:02	YSFAHVHSL	0.824823
HLA-B*51:01	VPLFIISQL	0.824241
HLA-B*53:01	SPSFPVSSF	0.82403
HLA-B*07:02	QPYVPGPLF	0.823633
HLA-B*51:01	VPISKVMVF	0.823383
HLA-B*53:01	LPSMVTLQL	0.823147
HLA-B*51:01	YPHWLQTKL	0.823008
HLA-B*07:02	SPQSLTNIF	0.821737
HLA-B*57:01	AALRFFRRF	0.821631
HLA-B*07:02	APLRLLLKL	0.821101
HLA-B*35:01	RPQPSPRTF	0.820618
HLA-B*35:01	IPPATFMSF	0.81903
HLA-B*15:01	VVFTPFVSF	0.818952
HLA-B*51:01	VAYLVYSSI	0.818929
HLA-B*53:01	IPHRPYHVF	0.818874
HLA-B*53:01	LPSSLPSSL	0.818799
HLA-B*51:01	FPSSFPASF	0.818606
HLA-B*53:01	LPFDPQFAL	0.817533
HLA-A*02:01	ILPSRFPSL	0.817502
HLA-B*51:01	YPHNYFLLF	0.816527
HLA-B*53:01	LPMKWVAFF	0.816453
HLA-B*07:02	GPHPNVPHF	0.81634
HLA-B*35:01	LPVFLHANF	0.815823
HLA-B*51:01	LPVSLPSSL	0.815603
HLA-B*35:01	LPFFFSVSL	0.815182
HLA-A*68:02	LIFPFLHYV	0.81445
HLA-B*08:01	VPISKVMVF	0.814199
HLA-B*35:01	VPFSAMSYM	0.813744
HLA-B*35:01	RPSPTPLDF	0.813158
HLA-B*35:01	MPYMKFKHF	0.812945
HLA-B*08:01	HPFIHAHTF	0.812782
HLA-B*35:01	VPLSSPAAL	0.812551
HLA-A*68:02	VVFDSTQYL	0.811958
HLA-B*53:01	LPPKLPTLF	0.811687
HLA-B*53:01	FPYVQLVQL	0.811571
HLA-B*53:01	APAAPAPSF	0.81097
HLA-B*51:01	LPHVFPAAL	0.810932
HLA-B*57:01	KAYKIMQEL	0.810417
HLA-B*35:01	LPHQINHRL	0.810368
HLA-B*07:02	FPYVQLVQL	0.809289
HLA-B*35:01	SPSLPFPSL	0.809252
HLA-B*35:01	YPSLLSAPL	0.808688
HLA-B*35:01	TPQFMTEYF	0.808529
HLA-B*51:01	SPYTHPPGL	0.808181
HLA-B*53:01	IPSQSPQQL	0.807966
HLA-A*02:03	SLIQNIYTI	0.807685
HLA-B*07:02	QPFRVESEL	0.807484
HLA-B*53:01	HPYNIAYLL	0.806889
HLA-B*07:02	VPLTYLQTL	0.806763
HLA-B*07:02	KPFSQLSNF	0.806435
HLA-B*51:01	LPFFFSVSL	0.806085
HLA-B*35:01	VPFIFSHQL	0.805888
HLA-A*68:02	SSYEKFQQV	0.805499
HLA-B*51:01	FPVSSFSSF	0.805425
HLA-B*07:02	IPATYITNL	0.805139
HLA-A*02:01	TLFNFFLSL	0.804999
HLA-B*07:02	VPFIFSHQL	0.8049
HLA-B*35:01	SPSFSPLSL	0.804561
HLA-A*02:06	SQAPYFNTM	0.803789
HLA-B*53:01	GPHPFQLSF	0.803372
HLA-A*32:01	RVVEYTHHL	0.803273
HLA-B*51:01	MPYMKFKHF	0.802796
HLA-A*02:03	ILPSRFPSL	0.802131
HLA-B*51:01	LPPPPPAAF	0.801166
HLA-B*35:01	VPSVMTLAL	0.800876
HLA-B*51:01	VPLILPLGI	0.799458
HLA-B*51:01	HPIAWLPTF	0.799195
HLA-B*07:02	APFAGMHIF	0.798396
HLA-A*02:01	VLYSFIALV	0.797786
HLA-B*07:02	SPYRLAFHL	0.79767
HLA-A*68:02	HSFSFSPRV	0.797477
HLA-B*53:01	TPTENHFTL	0.797312
HLA-A*68:02	STSSFLTSL	0.796818
HLA-B*35:01	SPSPHSHRL	0.796557
HLA-B*35:01	LPLPYSVRL	0.796125
HLA-B*08:01	TIFQRLLNL	0.795999
HLA-A*02:01	VVFDSTQYL	0.79591
HLA-B*35:01	VPNELLQPL	0.795735
HLA-B*53:01	FPFSSSASL	0.795555
HLA-A*02:01	SMVDFSSSL	0.794427
HLA-A*02:03	VLYSFIALV	0.794426
HLA-B*53:01	MPPSLPVTL	0.794017
HLA-B*53:01	LPHQINHRL	0.794006
HLA-B*53:01	LPYSITSYL	0.793488
HLA-B*53:01	HPLFFNPAF	0.793309
HLA-B*07:02	YPKIPFYFL	0.792625
HLA-B*53:01	SPQSLTNIF	0.79257
HLA-B*51:01	MPQPEVPPL	0.792319
HLA-B*51:01	HPQPSTYTL	0.791691
HLA-B*08:01	ILPSRFPSL	0.791538
HLA-B*53:01	MPYNFIGSF	0.791391
HLA-B*51:01	APLPSFPSL	0.791305
HLA-B*35:01	RPVDARLLF	0.790874
HLA-B*08:01	FPYVQLVQL	0.789777
HLA-B*58:01	SSNANEYTF	0.789052
HLA-B*51:01	YAYPVVEFL	0.788858
HLA-B*51:01	IAFNFLPTL	0.78878
HLA-B*53:01	YPYVLNPSL	0.788563
HLA-B*53:01	APFAGMHIF	0.787917
HLA-B*07:02	RPGEMLVIM	0.787602
HLA-B*53:01	TPQFMTEYF	0.787524
HLA-A*32:01	RSYHIFYQM	0.787302
HLA-B*07:02	LPFYLKLPL	0.786653
HLA-A*68:02	VTFPLVVTL	0.786487
HLA-B*53:01	SPSLPLFFF	0.786404
HLA-B*08:01	YSFAHVHSL	0.786318
HLA-B*08:01	SVYLKNQHL	0.78618
HLA-B*35:01	SPLPLFDAL	0.785925
HLA-A*24:02	MFFPFIYHL	0.78591
HLA-B*51:01	QPVPFLLRL	0.785042
HLA-A*02:03	GQFDYFVSL	0.784874
HLA-B*35:01	LPFLTALQL	0.784834
HLA-B*35:01	VPLAAATAL	0.784573
HLA-B*57:01	ATFPLFITI	0.784142
HLA-A*02:06	RTISFLPLL	0.784033
HLA-B*35:01	MPLILVAGF	0.783946
HLA-B*35:01	SPLPSSSPL	0.783178
HLA-B*35:01	LPPKLPTLF	0.783046
HLA-B*07:02	YPEWIWKSL	0.783015
HLA-B*51:01	VPLEASVTM	0.782723
HLA-B*35:01	APLPSFPSL	0.782719
HLA-B*08:01	FPQSLRYAL	0.782595
HLA-B*51:01	VPHAAVQIL	0.782441
HLA-B*53:01	SPQQALEQF	0.782142
HLA-B*53:01	LPLSPPSSL	0.781913
HLA-B*07:02	KPHREFYTF	0.781329
HLA-B*08:01	YPYKNITAF	0.781232
HLA-A*02:06	KQIRNILVV	0.781115
HLA-B*51:01	IPSQSPQQL	0.780025
HLA-B*53:01	SPILSHQFF	0.779988
HLA-A*02:06	AAFPSVVSL	0.779205
HLA-B*51:01	IPQPVRALL	0.778957
HLA-B*53:01	YPHWLQTKL	0.778859
HLA-B*51:01	FPLSASASL	0.778649
HLA-B*53:01	VPLEASVTM	0.77861
HLA-B*53:01	LPVSLPSSL	0.778421
HLA-B*07:02	LPLLYRSEF	0.778384
HLA-B*07:02	QPMNALVLL	0.778313
HLA-B*35:01	VPLLIASPF	0.776931
HLA-A*02:06	YSIDVFMAL	0.776817
HLA-B*53:01	VPNSHVQLL	0.776614
HLA-B*08:01	YPKIPFYFL	0.776296
HLA-B*53:01	LPFHPVFPF	0.774922
HLA-B*51:01	VPLILQSFI	0.774225
HLA-B*51:01	VPLVGIVSL	0.774201
HLA-B*08:01	SMPIRFLEL	0.773525
HLA-B*53:01	LPASLPEAL	0.773436
HLA-B*51:01	IAFNLLPTL	0.773272
HLA-B*35:01	KPHREFYTF	0.772174
HLA-A*02:06	ILPSRFPSL	0.771875
HLA-B*53:01	APHSILEAF	0.771784
HLA-B*53:01	LPYPVYSSL	0.770419
HLA-A*02:06	LVYDFAHAI	0.769448
HLA-B*53:01	LPLPYSVRL	0.768871
HLA-B*08:01	SPFIRGIGL	0.768438
HLA-B*51:01	FPSPQTWNF	0.768111
HLA-B*07:02	NPAPLSAFL	0.767108
HLA-B*53:01	MPMSFQNSL	0.767035
HLA-B*35:01	HPLLPFFSL	0.766804
HLA-B*53:01	GPHPNVPHF	0.766455
HLA-B*08:01	AALMHIVSL	0.766242
HLA-B*35:01	KPLEEIVAL	0.766053
HLA-B*53:01	LPWPGAHPL	0.765604
HLA-B*51:01	LPWPLTFHF	0.765581
HLA-B*51:01	LPLPASLNF	0.764776
HLA-B*07:02	VPPALALSL	0.764698
HLA-B*51:01	TAFDVYMHL	0.764494
HLA-B*53:01	VPQEFRQVF	0.764481
HLA-B*57:01	SSVSNPFSF	0.763784
HLA-B*35:01	LPLSLPLIL	0.763486
HLA-A*02:03	VVFDSTQYL	0.76316
HLA-B*07:02	LPLPYSVRL	0.762655
HLA-B*53:01	APNPKLVIF	0.762529
HLA-B*08:01	YPYLLVTEL	0.761363
HLA-B*53:01	MPQPEVPPL	0.761186
HLA-B*07:02	TPYLMTTRM	0.760822
HLA-B*53:01	FPTLIFLSL	0.760505
HLA-B*51:01	VPTVVYPFL	0.760502
HLA-B*51:01	LPAIFSSSL	0.760385
HLA-B*08:01	SPSPHSHRL	0.760356
HLA-B*53:01	LPLSLPLIL	0.760013
HLA-B*51:01	LPFAGMHIF	0.75977
HLA-A*32:01	RTISFLPLL	0.758723
HLA-B*51:01	SPYLSLLLL	0.758052
HLA-B*51:01	SPSLPFPSL	0.757698
HLA-B*51:01	LPSSLPSSL	0.756328
HLA-A*32:01	KTYPWYDYL	0.756225
HLA-A*02:01	RVVEYTHHL	0.754423
HLA-B*07:02	SPHYFVLLL	0.753033
HLA-B*07:02	MPHSPLERF	0.752958
HLA-B*58:01	KAFKLHHSL	0.752834
HLA-B*08:01	SPLQLPYAL	0.752677
HLA-B*08:01	FPLSVPTSL	0.752577
HLA-A*02:01	SLIYFAHTL	0.752544
HLA-A*02:03	SVFAQFNKV	0.752152
HLA-A*02:03	AVVSFFSTV	0.751976
HLA-B*53:01	RPYKPLQKF	0.75077
HLA-B*07:02	HPIAWLPTF	0.750732
HLA-A*02:06	SQARFLTRL	0.75029
HLA-B*51:01	IPVSLQVNL	0.74981
HLA-B*08:01	SPKDPTFTL	0.749751
HLA-B*53:01	TAYDPHAYF	0.749705
HLA-B*53:01	APFATFTLF	0.749655
HLA-B*51:01	VAYHTLQTL	0.74946
HLA-B*35:01	RPYKPLQKF	0.749428
HLA-B*51:01	LPHTLLAVL	0.748902
HLA-B*35:01	NPAPLSAFL	0.746502
HLA-B*07:02	VPLFIISQL	0.746368
HLA-B*53:01	MPYMKFKHF	0.743644
HLA-B*07:02	QPVPFLLRL	0.743413
HLA-B*51:01	MPIRFLELL	0.742749
HLA-B*51:01	IPIILQTAL	0.741609
HLA-B*51:01	TPFAGVHIF	0.740226
HLA-B*51:01	IPHRPYHVF	0.739504
HLA-B*51:01	VPSKMLIQL	0.738939
HLA-A*02:06	FAPPLLPAL	0.738567
HLA-B*35:01	VPNSHVQLL	0.73844
HLA-B*07:02	SPVILVTGL	0.73813
HLA-A*02:06	VLYPFLSLL	0.737291
HLA-B*07:02	LPLSLPLIL	0.73631
HLA-B*07:02	APWWLPWSL	0.736043
HLA-B*35:01	SPLLSIVSL	0.735467
HLA-B*51:01	IPTAFLVSM	0.735465
HLA-A*02:06	ATFTLFQRV	0.735249
HLA-B*51:01	QPYVPGPLF	0.73499
HLA-B*51:01	NPMSSVVQL	0.734745
HLA-B*53:01	RPQPSPRTF	0.734495
HLA-B*35:01	VPLVGIVSL	0.73444
HLA-B*08:01	VFYQRQAEL	0.734399
HLA-A*32:01	SLYRRVQTL	0.734391
HLA-B*51:01	LPFTLISGL	0.73366
HLA-B*07:02	QPLESFSLL	0.733377
HLA-B*35:01	MPSTLRLPL	0.73329
HLA-B*08:01	SPLLSIVSL	0.732815
HLA-B*53:01	KPVTATVQF	0.732545
HLA-B*57:01	VSWRDFLHL	0.732352
HLA-B*08:01	RPKLTSPTL	0.731657
HLA-B*53:01	SPSEAVTTL	0.731205
HLA-B*53:01	QPYSGVVTL	0.731117
HLA-B*35:01	YPRVAWLLF	0.730433
HLA-B*53:01	TPFLYRNTF	0.730318
HLA-B*53:01	RPSPTPLDF	0.729298
HLA-B*51:01	LPILSPASF	0.728729
HLA-B*53:01	SPASFLSAF	0.728637
HLA-A*68:02	ATFPLFITI	0.728175
HLA-B*51:01	SPYSIVDLL	0.726849
HLA-B*51:01	SPVPSPRSL	0.726208
HLA-B*51:01	MPYNFIGSF	0.725941
HLA-B*58:01	KAYKIMQEL	0.72547
HLA-A*26:01	TAYDPHAYF	0.725358
HLA-B*35:01	QPPPPLFLF	0.725027
HLA-B*51:01	LPTRLFQHL	0.724537
HLA-B*08:01	APNPKLVIF	0.723935
HLA-B*51:01	IPPATFMSF	0.722637
HLA-B*08:01	FALLHPLHL	0.722629
HLA-B*51:01	LPLTVEIEL	0.722208
HLA-B*53:01	KPNLDGLTF	0.720768
HLA-B*35:01	SPLVTFSLF	0.720376
HLA-B*53:01	SPDAPSLTL	0.72012
HLA-B*35:01	LPILLAASL	0.719567
HLA-A*02:03	YSFAHVHSL	0.71932
HLA-B*07:02	YPAWMWLSM	0.719244
HLA-B*08:01	TPGNHFFSL	0.719229
HLA-B*51:01	SPSEAVTTL	0.718689
HLA-B*35:01	IPVSLQVNL	0.717438
HLA-A*68:02	ATFTLFQRV	0.717218
HLA-B*35:01	KPFSQLSNF	0.716973
HLA-B*07:02	VPSAAWLLL	0.716718
HLA-B*35:01	APLKLRPVF	0.716097
HLA-A*02:06	SQFVYIEAL	0.715781
HLA-B*07:02	LPILLAASL	0.714194
HLA-B*51:01	VPSSSSPSL	0.714135
HLA-B*51:01	VPTEVKVAL	0.713303
HLA-B*08:01	FPFLHYVFL	0.712115
HLA-A*02:01	YSFAHVHSL	0.711619
HLA-B*53:01	SPLTAFPAF	0.711587
HLA-B*08:01	MPMSFQNSL	0.710903
HLA-B*57:01	KTYPWYDYL	0.710476
HLA-B*07:02	QPLALRSFF	0.710123
HLA-A*32:01	KAFKLHHSL	0.709098
HLA-B*53:01	VPFIFSHQL	0.70865
HLA-A*68:02	LVYDFAHAI	0.708367
HLA-B*53:01	IPQKNISTM	0.708226
HLA-B*08:01	MPKSVFWNL	0.707931
HLA-B*08:01	FPVRVPLSL	0.707502
HLA-B*07:02	YPRVAWLLF	0.706417
HLA-A*02:03	SLIPNSQVL	0.706227
HLA-B*51:01	IPQKNISTM	0.705895
HLA-B*51:01	QPLESFSLL	0.705742
HLA-A*02:06	TSLPFFFSV	0.705626
HLA-A*02:03	RVVEYTHHL	0.70549
HLA-B*57:01	SSFPLLSRL	0.70538
HLA-B*07:02	SPFHFWKHL	0.705305
HLA-B*08:01	HPQPSTYTL	0.70512
HLA-B*08:01	LPYPVYSSL	0.704537
HLA-B*53:01	APVPATLTL	0.704415
HLA-B*07:02	TPFAGVHIF	0.704196
HLA-B*53:01	SPLVTFSLF	0.703692
HLA-B*51:01	SPKDPTFTL	0.703287
HLA-B*53:01	RPVDARLLF	0.703084
HLA-B*35:01	LPHTLLAVL	0.703027
HLA-B*35:01	RPSAPASLF	0.702913
HLA-B*15:01	GQFDYFVSL	0.702281
HLA-B*51:01	LPVALQSLL	0.7021
HLA-A*02:06	ATYLHSVHV	0.701402
HLA-A*02:01	SLIPNSQVL	0.700623
HLA-B*07:02	LPKQVLEEF	0.700476
HLA-B*51:01	APVPATLTL	0.700306
HLA-B*51:01	SPAPPAPPL	0.700275

## Sheet: mhc2
MHC2 alleles	Epitope	Rank
HLA-DRB1*11:01	RPTRFRFLQRRARCA	0.01
HLA-DRB1*11:01	TRFRFLQRRARCASV	0.01
HLA-DRB3*02:02	FYISFFYVNRTRLAA	0.01
HLA-DRB3*02:02	ISFFYVNRTRLAAGS	0.01
HLA-DRB3*02:02	SFFYVNRTRLAAGSA	0.01
HLA-DRB3*02:02	YISFFYVNRTRLAAG	0.01
HLA-DRB1*09:01	LFRTAVVAAMAAALI	0.01
HLA-DQA1*05:01/DQB1*03:01	EAFAAVAAAAAPAAG	0.01
HLA-DQA1*05:01/DQB1*03:01	PEAFAAVAAAAAPAA	0.01
HLA-DRB1*09:01	LTPRTLAMASAARIA	0.01
HLA-DRB1*11:01	AARVFRIIKRKDSEQ	0.01
HLA-DRB1*11:01	ASEGIFRRLVRRLRR	0.01
HLA-DRB1*11:01	AVVSLLRLLKRRRRR	0.01
HLA-DRB1*11:01	EGIFRRLVRRLRRGR	0.01
HLA-DRB1*11:01	FRRLVRRLRRGRGTA	0.01
HLA-DRB1*11:01	GIFRRLVRRLRRGRG	0.01
HLA-DRB1*11:01	HAARVFRIIKRKDSE	0.01
HLA-DRB1*11:01	IFRRLVRRLRRGRGT	0.01
HLA-DRB1*11:01	PSAFRRLLRRLRFWR	0.01
HLA-DRB1*11:01	PSAFRRLTRRLRFWR	0.01
HLA-DRB1*11:01	PTGFRRLLRRLRFWR	0.01
HLA-DRB1*11:01	QSPSAFRRLTRRLRF	0.01
HLA-DRB1*11:01	SAFRRLLRRLRFWRR	0.01
HLA-DRB1*11:01	SEGIFRRLVRRLRRG	0.01
HLA-DRB1*11:01	SLLRLLKRRRRRAIQ	0.01
HLA-DRB1*11:01	SPSAFRRLTRRLRFW	0.01
HLA-DRB1*11:01	TGFRRLLRRLRFWRR	0.01
HLA-DRB1*11:01	VSLLRLLKRRRRRAI	0.01
HLA-DRB1*11:01	VVSLLRLLKRRRRRA	0.01
HLA-DPA1*02:01/DPB1*14:01	DRLRLSAAALAAARR	0.01
HLA-DPA1*02:01/DPB1*14:01	EDRLRLSAAALAAAR	0.01
HLA-DPA1*02:01/DPB1*14:01	LRLSAAALAAARRPR	0.01
HLA-DPA1*02:01/DPB1*14:01	REDRLRLSAAALAAA	0.01
HLA-DPA1*02:01/DPB1*14:01	RLLRLAKAAALPVAV	0.01
HLA-DPA1*02:01/DPB1*14:01	RLRLSAAALAAARRP	0.01
HLA-DPA1*02:01/DPB1*14:01	SRLLRLAKAAALPVA	0.01
HLA-DQA1*05:01/DQB1*03:01	GLMGARAAGAAAASA	0.01
HLA-DQA1*05:01/DQB1*03:01	RGLMGARAAGAAAAS	0.01
HLA-DRB1*01:01	FSRLSLSALKAAPAR	0.01
HLA-DPA1*02:01/DPB1*14:01	FQHLRRAAAAIPAAA	0.01
HLA-DPA1*02:01/DPB1*14:01	FRTAVVAAMAAALIT	0.01
HLA-DPA1*02:01/DPB1*14:01	GWRRRRAVRAAALFR	0.01
HLA-DPA1*02:01/DPB1*14:01	KLLFRTAVVAAMAAA	0.01
HLA-DPA1*02:01/DPB1*14:01	LFRTAVVAAMAAALI	0.01
HLA-DPA1*02:01/DPB1*14:01	QHLRRAAAAIPAAAS	0.01
HLA-DPA1*02:01/DPB1*14:01	RKLLFRTAVVAAMAA	0.01
HLA-DPA1*02:01/DPB1*14:01	RRRRAVRAAALFRRQ	0.01
HLA-DPA1*02:01/DPB1*14:01	WRRRRAVRAAALFRR	0.01
HLA-DRB5*01:01	SQLFHFRRARRRHRR	0.01
HLA-DRB1*01:01	DAARLYLTVRAVRLV	0.01
HLA-DRB1*11:01	RRPTRFRFLQRRARC	0.02
HLA-DQA1*05:01/DQB1*03:01	DQAMAAAAAGAAESD	0.02
HLA-DQA1*05:01/DQB1*03:01	HLRRAAAAIPAAASR	0.02
HLA-DQA1*05:01/DQB1*03:01	LRRAAAAIPAAASRF	0.02
HLA-DQA1*05:01/DQB1*03:01	NPEAFAAVAAAAAPA	0.02
HLA-DQA1*05:01/DQB1*03:01	NQDQAMAAAAAGAAE	0.02
HLA-DQA1*05:01/DQB1*03:01	QDQAMAAAAAGAAES	0.02
HLA-DQA1*05:01/DQB1*03:01	QHLRRAAAAIPAAAS	0.02
HLA-DQA1*05:01/DQB1*03:01	RRAAAAIPAAASRFF	0.02
HLA-DRB1*09:01	RLLRLAKAAALPVAV	0.02
HLA-DRB1*09:01	SRLLRLAKAAALPVA	0.02
HLA-DRB1*09:01	TPRTLAMASAARIAP	0.02
HLA-DRB1*11:01	GFRRLLRRLRFWRRG	0.02
HLA-DRB1*11:01	SPSAFRRLLRRLRFW	0.02
HLA-DPA1*01:03/DPB1*02:01	LAFYLWRYFFRWPIF	0.02
HLA-DQA1*05:01/DQB1*03:01	RRGLMGARAAGAAAA	0.02
HLA-DPA1*02:01/DPB1*14:01	GGWRRRRAVRAAALF	0.02
HLA-DPA1*02:01/DPB1*14:01	HLRRAAAAIPAAASR	0.02
HLA-DPA1*02:01/DPB1*14:01	LFQHLRRAAAAIPAA	0.02
HLA-DRB5*01:01	EEIAFYTVRSLKRTV	0.02
HLA-DRB5*01:01	EIAFYTVRSLKRTVP	0.02
HLA-DRB5*01:01	FSQLFHFRRARRRHR	0.02
HLA-DRB5*01:01	HEEIAFYTVRSLKRT	0.02
HLA-DRB5*01:01	IAFYTVRSLKRTVPP	0.02
HLA-DRB5*01:01	LAQLWRRAKSLFKRG	0.02
HLA-DRB5*01:01	QLFHFRRARRRHRRG	0.02
HLA-DRB1*09:01	FRTAVVAAMAAALIT	0.03
HLA-DQA1*05:01/DQB1*03:01	FQHLRRAAAAIPAAA	0.03
HLA-DQA1*05:01/DQB1*03:01	KNQDQAMAAAAAGAA	0.03
HLA-DRB1*09:01	PRTLAMASAARIAPN	0.03
HLA-DQA1*01:02/DQB1*06:02	AEQYHALAVMAAAIY	0.03
HLA-DQA1*01:02/DQB1*06:02	IAEQYHALAVMAAAI	0.03
HLA-DPA1*02:01/DPB1*14:01	FFSRLSLSALKAAPA	0.03
HLA-DPA1*01:03/DPB1*02:01	AFYLWRYFFRWPIFR	0.03
HLA-DPA1*01:03/DPB1*02:01	FYLWRYFFRWPIFRW	0.03
HLA-DPA1*02:01/DPB1*14:01	QEIRRAAPLAASPSP	0.03
HLA-DPA1*02:01/DPB1*14:01	SQEIRRAAPLAASPS	0.03
HLA-DRB5*01:01	LFHFRRARRRHRRGA	0.03
HLA-DRB5*01:01	RLAQLWRRAKSLFKR	0.03
HLA-DRB1*09:01	VQIAVYIASLAAGLA	0.04
HLA-DRB1*03:01	NRLVTDFKMRRKLKF	0.04
HLA-DRB1*11:01	MLYELFRKARRLKRS	0.04
HLA-DRB1*11:01	SPTGFRRLLRRLRFW	0.04
HLA-DQA1*01:02/DQB1*06:02	AVEGMMTAAALAQSD	0.04
HLA-DQA1*01:02/DQB1*06:02	EQYHALAVMAAAIYV	0.04
HLA-DQA1*01:02/DQB1*06:02	VEGMMTAAALAQSDS	0.04
HLA-DPA1*02:01/DPB1*14:01	FSRLSLSALKAAPAR	0.04
HLA-DPA1*02:01/DPB1*14:01	GTFQRAAIALTSVSS	0.04
HLA-DPA1*02:01/DPB1*14:01	LREIKASAASAASAA	0.04
HLA-DPA1*02:01/DPB1*14:01	MFFSRLSLSALKAAP	0.04
HLA-DPA1*02:01/DPB1*14:01	VRMRRLSSLASTAKA	0.04
HLA-DPA1*02:01/DPB1*14:01	LRRAAAAIPAAASRF	0.04
HLA-DPA1*02:01/DPB1*14:01	LVSYRFAAVSVVAMF	0.04
HLA-DPA1*02:01/DPB1*14:01	RAFMKRGVLAALAAV	0.04
HLA-DPA1*02:01/DPB1*14:01	SSQEIRRAAPLAASP	0.04
HLA-DPA1*02:01/DPB1*14:01	VSYRFAAVSVVAMFG	0.04
HLA-DRB1*03:01	RLVTDFKMRRKLKFR	0.05
HLA-DRB1*09:01	REDRLRLSAAALAAA	0.05
HLA-DRB1*11:01	LHAARVFRIIKRKDS	0.05
HLA-DRB1*11:01	QSPSAFRRLLRRLRF	0.05
HLA-DRB5*01:01	FFSQLFHFRRARRRH	0.05
HLA-DRB5*01:01	WFFSQLFHFRRARRR	0.05
HLA-DRB1*09:01	QIAVYIASLAAGLAP	0.06
HLA-DRB1*11:01	AFRRLLRRLRFWRRG	0.06
HLA-DRB1*11:01	LLRLLKRRRRRAIQE	0.06
HLA-DPA1*02:01/DPB1*14:01	AGTFQRAAIALTSVS	0.06
HLA-DPA1*02:01/DPB1*14:01	RMRRLSSLASTAKAT	0.06
HLA-DQA1*01:02/DQB1*06:02	FFPERQAAAVVAAQC	0.07
HLA-DQA1*01:02/DQB1*06:02	FPERQAAAVVAAQCL	0.07
HLA-DQA1*01:02/DQB1*06:02	PERQAAAVVAAQCLY	0.07
HLA-DPA1*01:03/DPB1*04:01	AHAFYFLSYERMKQF	0.07
HLA-DPA1*01:03/DPB1*04:01	YLWRYFFRWPIFRWI	0.07
HLA-DPA1*02:01/DPB1*14:01	PVRMRRLSSLASTAK	0.07
HLA-DPA1*02:01/DPB1*14:01	QAKRSATRALQILAA	0.07
HLA-DPA1*02:01/DPB1*14:01	TFQRAAIALTSVSSV	0.07
HLA-DRB1*01:01	PPLYQRMMAASAPWS	0.07
HLA-DPA1*02:01/DPB1*14:01	PSSQEIRRAAPLAAS	0.07
HLA-DPA1*02:01/DPB1*14:01	TLVSYRFAAVSVVAM	0.07
HLA-DRB3*02:02	VFYISFFYVNRTRLA	0.08
HLA-DQA1*01:02/DQB1*06:02	SFFPERQAAAVVAAQ	0.08
HLA-DPA1*01:03/DPB1*04:01	PAHAFYFLSYERMKQ	0.08
HLA-DQA1*01:02/DQB1*06:02	AIAEQYHALAVMAAA	0.08
HLA-DPA1*02:01/DPB1*14:01	AKRSATRALQILAAV	0.08
HLA-DPA1*02:01/DPB1*14:01	AFMKRGVLAALAAVC	0.08
HLA-DPA1*02:01/DPB1*14:01	ARAFMKRGVLAALAA	0.08
HLA-DRB5*01:01	SSMYAKLRGKKKKHR	0.08
HLA-DQA1*05:01/DQB1*03:01	ALGVAVLAALAAVAG	0.09
HLA-DRB1*11:01	TQSPSAFRRLTRRLR	0.09
HLA-DRB1*01:01	PLYQRMMAASAPWSA	0.09
HLA-DPA1*02:01/DPB1*14:01	DAARLYLTVRAVRLV	0.09
HLA-DPA1*01:03/DPB1*04:01	HAFYFLSYERMKQFF	0.1
HLA-DPA1*01:03/DPB1*04:01	WRYFFRWPIFRWIIG	0.1
HLA-DPA1*02:01/DPB1*14:01	RSRSRKLAIVSVLSL	0.1
HLA-DPA1*02:01/DPB1*14:01	WRRLFRRTKVARLER	0.1
HLA-DRB1*01:01	ATRYAAARAAMTDRH	0.1
HLA-DRB1*01:01	YSQLAAYLVAAALSA	0.1
HLA-DPA1*02:01/DPB1*14:01	ATARRMAAVAEALEW	0.1
HLA-DPA1*02:01/DPB1*14:01	FMKRGVLAALAAVCI	0.1
HLA-DPA1*02:01/DPB1*14:01	PLPRWRAVAVAAFLI	0.1
HLA-DRB5*01:01	AGFRLRFPRKRVSPP	0.1
HLA-DRB5*01:01	FHFRRARRRHRRGAG	0.1
HLA-DRB5*01:01	HPAGFRLRFPRKRVS	0.1
HLA-DRB5*01:01	HPPGFRLRFPRKRVS	0.1
HLA-DRB5*01:01	PAGFRLRFPRKRVSP	0.1
HLA-DRB5*01:01	PGFRLRFPRKRVSPP	0.1
HLA-DRB5*01:01	PPGFRLRFPRKRVSP	0.1
HLA-DRB5*01:01	QRLAQLWRRAKSLFK	0.1
HLA-DRB5*01:01	SMYAKLRGKKKKHRP	0.1
HLA-DRB5*01:01	THPAGFRLRFPRKRV	0.1
HLA-DRB5*01:01	THPPGFRLRFPRKRV	0.1
HLA-DRB1*01:01	EAFAAVAAAAAPAAG	0.1
HLA-DRB1*01:01	PEAFAAVAAAAAPAA	0.1
HLA-DQA1*01:02/DQB1*06:02	LLVPLAAATALASQG	0.11
HLA-DQA1*01:02/DQB1*06:02	LVPLAAATALASQGA	0.11
HLA-DRB1*09:01	RTLAMASAARIAPNA	0.11
HLA-DRB1*07:01	PWRRLFRRTKVARLE	0.11
HLA-DRB1*07:01	TPWRRLFRRTKVARL	0.11
HLA-DRB1*11:01	VMLYELFRKARRLKR	0.11
HLA-DQA1*01:02/DQB1*06:02	EDRLRLSAAALAAAR	0.11
HLA-DQA1*01:02/DQB1*06:02	QYHALAVMAAAIYVL	0.11
HLA-DQA1*01:02/DQB1*06:02	WAVEGMMTAAALAQS	0.11
HLA-DPA1*02:01/DPB1*14:01	PAGTFQRAAIALTSV	0.11
HLA-DPA1*02:01/DPB1*14:01	PLREIKASAASAASA	0.11
HLA-DPA1*02:01/DPB1*14:01	PPFSRAAALSLAQSC	0.11
HLA-DPA1*02:01/DPB1*14:01	REIKASAASAASAAS	0.11
HLA-DRB1*01:01	FATRYAAARAAMTDR	0.11
HLA-DRB1*01:01	LPPLYQRMMAASAPW	0.11
HLA-DPA1*02:01/DPB1*14:01	RLFQHLRRAAAAIPA	0.11
HLA-DRB1*09:01	LSLSALKAAPAREAL	0.12
HLA-DRB1*09:01	RLSLSALKAAPAREA	0.12
HLA-DRB1*11:01	GQSFASLFRRRKPAA	0.12
HLA-DPA1*02:01/DPB1*14:01	AVYASIAASSIRLAL	0.12
HLA-DPA1*02:01/DPB1*14:01	DLFATRYAAARAAMT	0.12
HLA-DPA1*02:01/DPB1*14:01	EVLRRLAALVQAFCA	0.12
HLA-DPA1*02:01/DPB1*14:01	PPPFSRAAALSLAQS	0.12
HLA-DPA1*02:01/DPB1*14:01	VLRRLAALVQAFCAA	0.12
HLA-DPA1*02:01/DPB1*14:01	EAFAAVAAAAAPAAG	0.12
HLA-DPA1*02:01/DPB1*14:01	ETRRAAEAIAAVARL	0.12
HLA-DPA1*02:01/DPB1*14:01	KLRSALAKAAVASEE	0.12
HLA-DPA1*02:01/DPB1*14:01	PEAFAAVAAAAAPAA	0.12
HLA-DPA1*02:01/DPB1*14:01	TRRAAEAIAAVARLQ	0.12
HLA-DRB1*11:01	AGVFAKARRRTLDRS	0.13
HLA-DRB1*11:01	LYELFRKARRLKRSD	0.13
HLA-DRB1*11:01	QSFASLFRRRKPAAP	0.13
HLA-DRB1*11:01	RLFQHLRRAAAAIPA	0.13
HLA-DQA1*01:02/DQB1*06:02	DRLRLSAAALAAARR	0.13
HLA-DPA1*02:01/DPB1*14:01	AAVYASIAASSIRLA	0.13
HLA-DPA1*02:01/DPB1*14:01	FLMRRMAKILKTSSM	0.13
HLA-DPA1*02:01/DPB1*14:01	LFATRYAAARAAMTD	0.13
HLA-DRB1*08:02	SFFYVNRTRLAAGSA	0.13
HLA-DRB1*01:01	FFSRLSLSALKAAPA	0.13
HLA-DRB1*09:01	PWRRLFRRTKVARLE	0.14
HLA-DRB1*09:01	WRRLFRRTKVARLER	0.14
HLA-DRB1*09:01	EDRLRLSAAALAAAR	0.14
HLA-DPA1*01:03/DPB1*04:01	AFYFLSYERMKQFFL	0.14
HLA-DPA1*01:03/DPB1*02:01	KFAFRYFCRSFLKLR	0.14
HLA-DPA1*02:01/DPB1*14:01	GPVRMRRLSSLASTA	0.14
HLA-DPA1*01:03/DPB1*02:01	IVFYISFFYVNRTRL	0.14
HLA-DRB1*01:01	LYQRMMAASAPWSAD	0.14
HLA-DRB5*01:01	AVVSLLRLLKRRRRR	0.14
HLA-DRB5*01:01	GFLFLRYATPRSKRP	0.14
HLA-DRB5*01:01	VSLLRLLKRRRRRAI	0.14
HLA-DRB5*01:01	VVSLLRLLKRRRRRA	0.14
HLA-DRB1*11:01	GVFAKARRRTLDRSK	0.15
HLA-DRB1*11:01	NAGVFAKARRRTLDR	0.15
HLA-DRB1*11:01	SGLRYLRRKTFHAGP	0.15
HLA-DQA1*05:01/DQB1*03:01	QALGVAVLAALAAVA	0.15
HLA-DPA1*02:01/DPB1*14:01	KRSATRALQILAAVL	0.15
HLA-DPA1*01:03/DPB1*04:01	KFAFRYFCRSFLKLR	0.15
HLA-DPA1*02:01/DPB1*14:01	DKLRSALAKAAVASE	0.15
HLA-DRB1*11:01	AGQSFASLFRRRKPA	0.16
HLA-DRB1*01:01	PLPPLYQRMMAASAP	0.16
HLA-DRB1*01:01	RLLRLAKAAALPVAV	0.16
HLA-DRB1*01:01	SRLLRLAKAAALPVA	0.16
HLA-DRB1*01:01	VFIWLALRAAQLRRA	0.16
HLA-DRB5*01:01	ASEGIFRRLVRRLRR	0.16
HLA-DRB5*01:01	EGIFRRLVRRLRRGR	0.16
HLA-DRB5*01:01	GIFRRLVRRLRRGRG	0.16
HLA-DRB5*01:01	PSAFRRLLRRLRFWR	0.16
HLA-DRB5*01:01	PTGFRRLLRRLRFWR	0.16
HLA-DRB5*01:01	QSPSAFRRLLRRLRF	0.16
HLA-DRB5*01:01	SAFRRLLRRLRFWRR	0.16
HLA-DRB5*01:01	SEGIFRRLVRRLRRG	0.16
HLA-DRB5*01:01	SPSAFRRLLRRLRFW	0.16
HLA-DRB5*01:01	SPTGFRRLLRRLRFW	0.16
HLA-DRB5*01:01	TGFRRLLRRLRFWRR	0.16
HLA-DRB1*01:01	FLLLVPLAAATALAS	0.16
HLA-DRB1*01:01	FRTAVVAAMAAALIT	0.16
HLA-DRB1*01:01	LFRTAVVAAMAAALI	0.16
HLA-DRB1*01:01	NPEAFAAVAAAAAPA	0.16
HLA-DRB1*01:01	RTAVVAAMAAALITL	0.16
HLA-DPA1*01:03/DPB1*04:01	FFSFLQWPFFRRKGA	0.17
HLA-DQA1*05:01/DQB1*03:01	AAVYASIAASSIRLA	0.17
HLA-DRB5*01:01	PSAFRRLTRRLRFWR	0.17
HLA-DRB5*01:01	PTRFRFLQRRARCAS	0.17
HLA-DRB1*11:01	DSGLRYLRRKTFHAG	0.18
HLA-DRB1*07:01	WRRLFRRTKVARLER	0.18
HLA-DRB1*08:02	ISFFYVNRTRLAAGS	0.18
HLA-DQA1*04:01/DQB1*04:02	GGSLRAASAAVSSES	0.19
HLA-DQA1*04:01/DQB1*04:02	GSLRAASAAVSSESV	0.19
HLA-DRB1*09:01	RTAVVAAMAAALITL	0.19
HLA-DQA1*05:01/DQB1*03:01	IPGGSLRAASAAVSS	0.19
HLA-DPA1*02:01/DPB1*14:01	FATRYAAARAAMTDR	0.19
HLA-DPA1*02:01/DPB1*14:01	SRLSLSALKAAPARE	0.19
HLA-DPA1*02:01/DPB1*14:01	STLLGIRAIKAANIT	0.19
HLA-DQA1*05:01/DQB1*03:01	AVYASIAASSIRLAL	0.19
HLA-DPA1*02:01/DPB1*14:01	AATARRMAAVAEALE	0.19
HLA-DPA1*02:01/DPB1*14:01	DGGWRRRRAVRAAAL	0.2
HLA-DRB3*02:02	EDRLRLSAAALAAAR	0.2
HLA-DRB1*04:01	PLYQRFRRTRSTASD	0.2
HLA-DRB1*04:01	RPLYQRFRRTRSTAS	0.2
HLA-DPA1*02:01/DPB1*14:01	EPFERIMATAVYAGA	0.2
HLA-DPA1*02:01/DPB1*14:01	KAILSTMMARATALA	0.2
HLA-DPA1*02:01/DPB1*14:01	KRSRSRKLAIVSVLS	0.2
HLA-DPA1*02:01/DPB1*14:01	LTPRTLAMASAARIA	0.2
HLA-DPA1*02:01/DPB1*14:01	PFERIMATAVYAGAT	0.2
HLA-DPA1*02:01/DPB1*14:01	PWRRLFRRTKVARLE	0.2
HLA-DPA1*02:01/DPB1*14:01	AETRRAAEAIAAVAR	0.2
HLA-DPA1*02:01/DPB1*14:01	HRSRRLRASLVSSKE	0.2
HLA-DPA1*02:01/DPB1*14:01	PPLPRWRAVAVAAFL	0.2
HLA-DPA1*02:01/DPB1*14:01	RARLTSQVALAAAPI	0.2
HLA-DRB5*01:01	GFRLRFPRKRVSPPY	0.2
HLA-DRB5*01:01	LWWRFYWAMYATRRI	0.2
HLA-DRB5*01:01	WWRFYWAMYATRRID	0.2
HLA-DQA1*01:02/DQB1*06:02	VPLAAATALASQGAL	0.21
HLA-DQA1*01:02/DQB1*06:02	RLRLSAAALAAARRP	0.21
HLA-DRB1*08:02	SPTVQILAAASSAAA	0.21
HLA-DPA1*02:01/DPB1*14:01	VLEVLRRLAALVQAF	0.21
HLA-DQA1*05:01/DQB1*03:01	ATRYAAARAAMTDRH	0.21
HLA-DQA1*05:01/DQB1*03:01	FATRYAAARAAMTDR	0.21
HLA-DQA1*05:01/DQB1*03:01	LFATRYAAARAAMTD	0.21
HLA-DRB5*01:01	SLLRLLKRRRRRAIQ	0.21
HLA-DRB5*01:01	FVSHFLRKVWSFRKL	0.21
HLA-DRB5*01:01	FWGYLFFRSLCRHRK	0.21
HLA-DRB5*01:01	SHFLRKVWSFRKLSC	0.21
HLA-DRB5*01:01	VSHFLRKVWSFRKLS	0.21
HLA-DRB5*01:01	WGYLFFRSLCRHRKR	0.21
HLA-DRB1*11:01	GDSGLRYLRRKTFHA	0.22
HLA-DPA1*01:03/DPB1*02:01	VFYISFFYVNRTRLA	0.22
HLA-DRB1*09:01	PPFSRAAALSLAQSC	0.23
HLA-DRB1*09:01	PPPFSRAAALSLAQS	0.23
HLA-DRB1*11:01	FRRLLRRLRFWRRGR	0.23
HLA-DRB1*11:01	FRRLLRRLRFWRRGS	0.23
HLA-DQA1*01:02/DQB1*06:02	FERIMATAVYAGATV	0.23
HLA-DPA1*02:01/DPB1*14:01	EARRLAAESLLANPL	0.23
HLA-DPA1*02:01/DPB1*14:01	LEVLRRLAALVQAFC	0.23
HLA-DPA1*02:01/DPB1*14:01	TPRTLAMASAARIAP	0.23
HLA-DRB1*15:01	AAALRFFRRFRRVRQ	0.23
HLA-DPA1*02:01/DPB1*14:01	NPEAFAAVAAAAAPA	0.23
HLA-DPA1*02:01/DPB1*14:01	YDRARLTSQVALAAA	0.23
HLA-DRB1*09:01	EAFAAVAAAAAPAAG	0.24
HLA-DRB1*09:01	PEAFAAVAAAAAPAA	0.24
HLA-DRB1*09:01	DRLRLSAAALAAARR	0.24
HLA-DRB1*09:01	SLSALKAAPAREALP	0.24
HLA-DPA1*01:03/DPB1*04:01	FYLWRYFFRWPIFRW	0.24
HLA-DPA1*02:01/DPB1*14:01	ARRLAAESLLANPLR	0.24
HLA-DPA1*02:01/DPB1*14:01	FERIMATAVYAGATV	0.24
HLA-DPA1*02:01/DPB1*14:01	QAAKRMWTAARSHVA	0.24
HLA-DPA1*01:03/DPB1*02:01	IPIFLYFHLFRIRYS	0.24
HLA-DRB1*01:01	EDRLRLSAAALAAAR	0.24
HLA-DRB1*01:01	EPFERIMATAVYAGA	0.24
HLA-DRB1*01:01	FIWLALRAAQLRRAH	0.24
HLA-DRB1*01:01	REDRLRLSAAALAAA	0.24
HLA-DPA1*01:03/DPB1*04:01	YEYSVEFFFSRCRRV	0.24
HLA-DRB1*11:01	GIFAYVLHRKLNRRL	0.25
HLA-DQA1*01:02/DQB1*06:02	LLLVPLAAATALASQ	0.25
HLA-DRB1*09:01	NPEAFAAVAAAAAPA	0.25
HLA-DQA1*01:02/DQB1*06:02	KRSATRALQILAAVL	0.25
HLA-DQA1*01:02/DQB1*06:02	PFERIMATAVYAGAT	0.25
HLA-DPA1*02:01/DPB1*14:01	MRRLSSLASTAKATD	0.25
HLA-DPA1*02:01/DPB1*14:01	AAATARRMAAVAEAL	0.25
HLA-DRB5*01:01	QSPSAFRRLTRRLRF	0.25
HLA-DRB5*01:01	SPSAFRRLTRRLRFW	0.25
HLA-DRB5*01:01	TQSPSAFRRLTRRLR	0.25
HLA-DRB5*01:01	RPTRFRFLQRRARCA	0.25
HLA-DRB5*01:01	TRFRFLQRRARCASV	0.25
HLA-DRB1*11:01	TPWRRLFRRTKVARL	0.26
HLA-DRB1*11:01	RHLASWRLLKRTVVV	0.26
HLA-DRB1*11:01	YELFRKARRLKRSDE	0.26
HLA-DPA1*02:01/DPB1*14:01	PRTLAMASAARIAPN	0.26
HLA-DPA1*02:01/DPB1*14:01	RTLAMASAARIAPNA	0.26
HLA-DPA1*02:01/DPB1*14:01	YDLFATRYAAARAAM	0.26
HLA-DPA1*01:03/DPB1*02:01	LLFALWFRRWTFRWT	0.26
HLA-DRB5*01:01	WRFYWAMYATRRIDF	0.26
HLA-DRB1*11:01	GRKHFQTMAKLSAAV	0.27
HLA-DRB1*11:01	RKHFQTMAKLSAAVP	0.27
HLA-DRB1*11:01	RRTSFSWVRRRYVWR	0.27
HLA-DQA1*01:02/DQB1*06:02	ILLAASLAVAAVSSL	0.27
HLA-DQA1*04:01/DQB1*04:02	PGGSLRAASAAVSSE	0.27
HLA-DQA1*05:01/DQB1*03:01	FRTAVVAAMAAALIT	0.27
HLA-DQA1*05:01/DQB1*03:01	ILLAASLAVAAVSSL	0.27
HLA-DQA1*05:01/DQB1*03:01	RTAVVAAMAAALITL	0.27
HLA-DRB1*07:01	RLLRLAKAAALPVAV	0.27
HLA-DRB1*07:01	SRLLRLAKAAALPVA	0.27
HLA-DRB1*11:01	FSQLFHFRRARRRHR	0.27
HLA-DRB1*11:01	SQLFHFRRARRRHRR	0.27
HLA-DQA1*01:02/DQB1*06:02	PPFSRAAALSLAQSC	0.27
HLA-DRB1*08:02	YISFFYVNRTRLAAG	0.27
HLA-DRB1*15:01	AALRFFRRFRRVRQP	0.27
HLA-DRB1*04:01	VRMRRLSSLASTAKA	0.28
HLA-DRB1*07:01	AAVYASIAASSIRLA	0.28
HLA-DRB1*07:01	AVYASIAASSIRLAL	0.28
HLA-DPA1*02:01/DPB1*14:01	AAKRMWTAARSHVAE	0.28
HLA-DRB1*11:01	ALGLFYLATRKLPAL	0.29
HLA-DRB1*04:01	PVRMRRLSSLASTAK	0.29
HLA-DRB1*11:01	AAALRFFRRFRRVRQ	0.29
HLA-DRB1*11:01	AALRFFRRFRRVRQP	0.29
HLA-DRB1*11:01	ALRFFRRFRRVRQPV	0.29
HLA-DRB1*11:01	WARYRAVRRNHSVFK	0.29
HLA-DPA1*02:01/DPB1*01:01	IVFYISFFYVNRTRL	0.29
HLA-DQA1*05:01/DQB1*03:01	TRYAAARAAMTDRHS	0.29
HLA-DRB1*09:01	AGLTVGLSAMAAGLA	0.3
HLA-DRB1*09:01	IAEQYHALAVMAAAI	0.3
HLA-DRB1*09:01	LWWRFYWAMYATRRI	0.3
HLA-DPA1*02:01/DPB1*14:01	LMRRMAKILKTSSMR	0.3
HLA-DPA1*02:01/DPB1*14:01	MEARRLAAESLLANP	0.3
HLA-DPA1*02:01/DPB1*14:01	PRWFYVAAVKASLDL	0.3
HLA-DPA1*02:01/DPB1*14:01	WARAFMKRGVLAALA	0.3
HLA-DRB1*11:01	KHFQTMAKLSAAVPT	0.31
HLA-DQA1*05:01/DQB1*03:01	LFRTAVVAAMAAALI	0.31
HLA-DPA1*02:01/DPB1*05:01	IPIFLYFHLFRIRYS	0.31
HLA-DQA1*01:02/DQB1*06:02	AKRSATRALQILAAV	0.31
HLA-DQA1*01:02/DQB1*06:02	KAILSTMMARATALA	0.31
HLA-DRB1*08:02	AYYIRKVLTYRRRVM	0.31
HLA-DPA1*02:01/DPB1*14:01	FPRWFYVAAVKASLD	0.31
HLA-DRB1*01:01	LFATRYAAARAAMTD	0.31
HLA-DRB1*11:01	RTSFSWVRRRYVWRS	0.32
HLA-DRB3*02:02	DRLRLSAAALAAARR	0.32
HLA-DRB3*02:02	REDRLRLSAAALAAA	0.32
HLA-DPA1*01:03/DPB1*04:01	LWWRFYWAMYATRRI	0.32
HLA-DRB1*11:01	ADAYPALRRRKGSRV	0.32
HLA-DRB1*11:01	QLFHFRRARRRHRRG	0.32
HLA-DPA1*01:03/DPB1*02:01	YEYSVEFFFSRCRRV	0.32
HLA-DRB1*15:01	IVFYISFFYVNRTRL	0.32
HLA-DPA1*02:01/DPB1*14:01	STMMARATALAKNKK	0.32
HLA-DPA1*01:03/DPB1*02:01	PIFLYFHLFRIRYST	0.32
HLA-DPA1*01:03/DPB1*04:01	RWFFSQLFHFRRARR	0.32
HLA-DRB5*01:01	AFRRLLRRLRFWRRG	0.32
HLA-DRB5*01:01	GFRRLLRRLRFWRRG	0.32
HLA-DRB1*09:01	WWRFYWAMYATRRID	0.33
HLA-DQA1*01:02/DQB1*06:02	RSATRALQILAAVLF	0.33
HLA-DPA1*02:01/DPB1*14:01	IEKVTRIAALEAAST	0.33
HLA-DPA1*02:01/DPB1*14:01	TLREVLSAVSASVAA	0.33
HLA-DPA1*02:01/DPB1*14:01	WAGIKARAAAVVVTA	0.33
HLA-DRB1*15:01	PAAALRFFRRFRRVR	0.33
HLA-DPA1*02:01/DPB1*14:01	DRARLTSQVALAAAP	0.33
HLA-DQA1*01:02/DQB1*06:02	KLLFRTAVVAAMAAA	0.34
HLA-DPA1*02:01/DPB1*14:01	EMEARRLAAESLLAN	0.34
HLA-DPA1*02:01/DPB1*14:01	LREVLSAVSASVAAL	0.34
HLA-DPA1*02:01/DPB1*14:01	LSTMMARATALAKNK	0.34
HLA-DQA1*05:01/DQB1*03:01	AWAASRAKAAAAASM	0.35
HLA-DQA1*05:01/DQB1*03:01	GSLRAASAAVSSESV	0.35
HLA-DQA1*05:01/DQB1*03:01	PGGSLRAASAAVSSE	0.35
HLA-DRB1*09:01	ELSPYQSAAAATLAS	0.35
HLA-DRB1*04:05	LLLFWRFRSARDGRH	0.35
HLA-DRB1*04:05	TLLLFWRFRSARDGR	0.35
HLA-DQA1*01:02/DQB1*06:02	RKLLFRTAVVAAMAA	0.36
HLA-DRB1*04:01	GPVRMRRLSSLASTA	0.36
HLA-DRB1*11:01	DAYPALRRRKGSRVY	0.36
HLA-DRB1*11:01	LRFFRRFRRVRQPVF	0.36
HLA-DRB1*08:02	SRLLRLAKAAALPVA	0.36
HLA-DPA1*01:03/DPB1*02:01	YFWGYLFFRSLCRHR	0.36
HLA-DRB1*04:05	LLFWRFRSARDGRHS	0.36
HLA-DPA1*02:01/DPB1*14:01	RRAAEAIAAVARLQA	0.36
HLA-DRB5*01:01	RRPTRFRFLQRRARC	0.36
HLA-DQA1*01:02/DQB1*06:02	LFRTAVVAAMAAALI	0.37
HLA-DQA1*05:01/DQB1*03:01	GGSLRAASAAVSSES	0.37
HLA-DQA1*01:02/DQB1*06:02	PPPFSRAAALSLAQS	0.37
HLA-DPA1*01:03/DPB1*02:01	YLWRYFFRWPIFRWI	0.37
HLA-DQA1*05:01/DQB1*03:01	DLFATRYAAARAAMT	0.37
HLA-DRB5*01:01	FRRLLRRLRFWRRGR	0.37
HLA-DRB5*01:01	MLYELFRKARRLKRS	0.37
HLA-DRB5*01:01	HFLRKVWSFRKLSCF	0.37
HLA-DRB1*11:01	VVLLSVLRRQRGRKH	0.38
HLA-DRB1*09:01	GLTVGLSAMAAGLAI	0.38
HLA-DRB1*09:01	TVGLSAMAAGLAIGI	0.38
HLA-DQA1*01:02/DQB1*06:02	SWAVEGMMTAAALAQ	0.38
HLA-DPA1*02:01/DPB1*14:01	RLSLSALKAAPAREA	0.38
HLA-DRB1*01:01	LFMLTMMSTRVSLQK	0.38
HLA-DRB1*01:01	LLWLMKVLAVLSAVV	0.38
HLA-DRB1*01:01	LWLMKVLAVLSAVVM	0.38
HLA-DRB1*01:01	LLLVPLAAATALASQ	0.38
HLA-DRB1*11:01	DQTYHTFLRRRHETT	0.39
HLA-DRB1*11:01	KKSWRQLKRHRGERR	0.39
HLA-DRB1*11:01	QTYHTFLRRRHETTD	0.39
HLA-DRB1*11:01	YLFFRSLCRHRKRSG	0.39
HLA-DRB1*09:01	LTVGLSAMAAGLAIG	0.39
HLA-DQA1*05:01/DQB1*03:01	IQLVLHAAVSASVAL	0.39
HLA-DRB1*09:01	AEQYHALAVMAAAIY	0.39
HLA-DRB1*11:01	EFIRYLVRAKKDRIG	0.39
HLA-DRB1*11:01	LRLLKRRRRRAIQEE	0.39
HLA-DPA1*02:01/DPB1*14:01	AEQYHALAVMAAAIY	0.39
HLA-DPA1*02:01/DPB1*14:01	IQSRILASLEAQKAA	0.39
HLA-DPA1*02:01/DPB1*14:01	SLQRAMSINAALLAN	0.39
HLA-DPA1*02:01/DPB1*14:01	VSTLLGIRAIKAANI	0.39
HLA-DPA1*02:01/DPB1*14:01	RTAVVAAMAAALITL	0.39
HLA-DRB5*01:01	RFYWAMYATRRIDFG	0.39
HLA-DRB1*09:01	IQLVLHAAVSASVAL	0.4
HLA-DPA1*02:01/DPB1*14:01	LQRAMSINAALLANV	0.4
HLA-DPA1*02:01/DPB1*14:01	RWFYVAAVKASLDLA	0.4
HLA-DPA1*01:03/DPB1*02:01	IFLYFHLFRIRYSTC	0.4
HLA-DQA1*01:02/DQB1*06:02	DELEAVRAMHASEKA	0.41
HLA-DQA1*01:02/DQB1*06:02	HLRRAAAAIPAAASR	0.41
HLA-DQA1*01:02/DQB1*06:02	QHLRRAAAAIPAAAS	0.41
HLA-DRB1*04:01	LGPVRMRRLSSLAST	0.41
HLA-DRB1*09:01	FFSRLSLSALKAAPA	0.41
HLA-DRB1*09:01	FSRLSLSALKAAPAR	0.41
HLA-DRB1*09:01	SRLSLSALKAAPARE	0.41
HLA-DRB1*11:01	DEFIRYLVRAKKDRI	0.41
HLA-DPA1*02:01/DPB1*14:01	MSFSKTTSLASLALT	0.41
HLA-DPA1*02:01/DPB1*14:01	RSEVQRLTALAAAQT	0.41
HLA-DRB1*01:01	SEVQRLTALAAAQTE	0.41
HLA-DRB1*11:01	GYLFFRSLCRHRKRS	0.42
HLA-DRB1*11:01	IFAYVLHRKLNRRLL	0.42
HLA-DRB1*11:01	LFFRSLCRHRKRSGK	0.42
HLA-DRB1*11:01	STPWRRLFRRTKVAR	0.42
HLA-DRB1*11:01	WGYLFFRSLCRHRKR	0.42
HLA-DQA1*01:02/DQB1*06:02	LRRAAAAIPAAASRF	0.42
HLA-DRB1*11:01	GDEFIRYLVRAKKDR	0.42
HLA-DRB1*11:01	GWARYRAVRRNHSVF	0.42
HLA-DRB1*11:01	LFHFRRARRRHRRGA	0.42
HLA-DRB1*11:01	SADAYPALRRRKGSR	0.42
HLA-DRB1*11:01	SSMYAKLRGKKKKHR	0.42
HLA-DRB1*08:02	LGIIILAMSSSKAAS	0.42
HLA-DPA1*02:01/DPB1*14:01	ESLQRAMSINAALLA	0.42
HLA-DRB5*01:01	VMLYELFRKARRLKR	0.42
HLA-DRB5*01:01	GYLFFRSLCRHRKRS	0.42
HLA-DRB5*01:01	YLFFRSLCRHRKRSG	0.42
HLA-DRB1*09:01	TPWRRLFRRTKVARL	0.43
HLA-DPA1*01:03/DPB1*04:01	TVQEYVTFFSRLKMR	0.43
HLA-DPA1*01:03/DPB1*04:01	WWRFYWAMYATRRID	0.43
HLA-DPA1*02:01/DPB1*14:01	ATRYAAARAAMTDRH	0.43
HLA-DPA1*02:01/DPB1*14:01	EKVTRIAALEAASTH	0.43
HLA-DPA1*02:01/DPB1*14:01	EQYHALAVMAAAIYV	0.43
HLA-DPA1*02:01/DPB1*14:01	QSRILASLEAQKAAT	0.43
HLA-DPA1*02:01/DPB1*14:01	TESEARAIASFLSSS	0.43
HLA-DPA1*02:01/DPB1*14:01	TVPRTWKAVVAATNR	0.43
HLA-DRB5*01:01	FRRLLRRLRFWRRGS	0.43
HLA-DRB1*11:01	AASFVKPARRKARKE	0.44
HLA-DRB1*11:01	ASFVKPARRKARKEH	0.44
HLA-DRB1*11:01	DAASFVKPARRKARK	0.44
HLA-DRB1*12:01	ALSASALLAMTALAY	0.44
HLA-DPA1*02:01/DPB1*14:01	AILSTMMARATALAK	0.44
HLA-DPA1*02:01/DPB1*14:01	ILSTMMARATALAKN	0.44
HLA-DPA1*02:01/DPB1*14:01	LSLSALKAAPAREAL	0.44
HLA-DRB1*11:01	FLMRRMAKILKTSSM	0.45
HLA-DRB1*11:01	LMRRMAKILKTSSMR	0.45
HLA-DQA1*01:02/DQB1*06:02	KAFQQAAKAAAAAEG	0.45
HLA-DQA1*05:01/DQB1*03:01	WIQLVLHAAVSASVA	0.45
HLA-DRB1*04:01	ELGPVRMRRLSSLAS	0.45
HLA-DQA1*01:02/DQB1*06:02	EPFERIMATAVYAGA	0.45
HLA-DRB1*08:02	EAFAAVAAAAAPAAG	0.45
HLA-DPA1*02:01/DPB1*14:01	TPWRRLFRRTKVARL	0.45
HLA-DQA1*05:01/DQB1*03:01	SLFPAMTAAASASSS	0.45
HLA-DPA1*02:01/DPB1*14:01	GSLRAASAAVSSESV	0.45
HLA-DRB5*01:01	LYELFRKARRLKRSD	0.45
HLA-DRB1*11:01	PGRKHFQTMAKLSAA	0.46
HLA-DRB1*03:01	TKYWLRSDRVVHAQC	0.46
HLA-DPA1*02:01/DPB1*14:01	HIEKVTRIAALEAAS	0.46
HLA-DQA1*05:01/DQB1*03:01	REIKASAASAASAAS	0.47
HLA-DRB1*01:01	GLFMLTMMSTRVSLQ	0.47
HLA-DRB1*09:01	EQYHALAVMAAAIYV	0.48
HLA-DRB1*08:02	PEAFAAVAAAAAPAA	0.48
HLA-DRB4*01:01	AQILVAQAASQAYSS	0.48
HLA-DPA1*02:01/DPB1*14:01	AKAFQQAAKAAAAAE	0.48
HLA-DRB5*01:01	YFWGYLFFRSLCRHR	0.48
HLA-DRB1*09:01	GIIILAMSSSKAASK	0.49
HLA-DPA1*02:01/DPB1*05:01	YFWGYLFFRSLCRHR	0.49
HLA-DPA1*02:01/DPB1*14:01	PPLREIKASAASAAS	0.49
HLA-DPA1*02:01/DPB1*14:01	TMMARATALAKNKKP	0.49
HLA-DRB1*11:01	LRRTSFSWVRRRYVW	0.5
HLA-DRB1*11:01	TSFSWVRRRYVWRST	0.5
HLA-DQA1*01:02/DQB1*06:02	AKAFQQAAKAAAAAE	0.5
HLA-DQA1*01:02/DQB1*06:02	AILSTMMARATALAK	0.5
HLA-DQA1*01:02/DQB1*06:02	LRLSAAALAAARRPR	0.5
HLA-DRB1*08:02	GFLFLRYATPRSKRP	0.5
